# Supplementary material for: Catalytic enantioselective Michael addition of 2-substituted benzofuran-3-ones to 2-enoyl pyridines
Source: Royal Society of Chemistry journal article supplement (doi:10.1039/c9ob01069f), 2019-01-01
Supplement: c9ob01069f1.pdf [file c9ob01069f1.pdf]

## CATALYTIC ENANTIOSELECTIVE MICHAEL ADDITION OF 2-SUBSTITUTED BENZOFURAN-3-ONES WITH 2-ENOYL PYRIDINES

Koilpitchai Sivamuthuraman, and Venkitasamy Kesavan <sup>\*[a]</sup>

<sup>[a]</sup>Chemical Biology Laboratory, Department of Biotechnology, Bhupat and Jyothi Metha School of Biosciences, Indian Institute of Technology Madras, Chennai-600036, India. Fax: +91(44)22574102, E-mail: [vkesavan@iitm.ac.in](mailto:vkesavan@iitm.ac.in)

### Supporting Information

#### LIST OF CONTENTS:

|           |                                                                                              |           |
|-----------|----------------------------------------------------------------------------------------------|-----------|
| <b>1</b>  | <b>General remarks</b>                                                                       | <b>1</b>  |
| <b>2</b>  | <b>Representative experimental procedure for the synthesis of Michael addition products.</b> | <b>2</b>  |
| <b>3</b>  | <b>Analytical data for Michael Addition product 4</b>                                        | <b>3</b>  |
| <b>4</b>  | <b>Reference</b>                                                                             | <b>18</b> |
| <b>5</b>  | <b>Crystal data and structure refinement of compound 4i (Major Diastereomer)</b>             | <b>19</b> |
| <b>6</b>  | <b>ORTEP Diagram of Compound 4i (Major Diastereomer)</b>                                     | <b>20</b> |
| <b>7</b>  | <b><sup>1</sup>H NMR And <sup>13</sup>C NMR Data</b>                                         | <b>21</b> |
| <b>8</b>  | <b>HPLC Chromatograms for Compound 4</b>                                                     | <b>41</b> |
| <b>9</b>  | <b>HPLC Chromatograms for Compound ent-4</b>                                                 | <b>64</b> |
| <b>10</b> | <b>Control Experiments</b>                                                                   | <b>70</b> |
| <b>11</b> | <b>HPLC Chromatograms for Catalyst Screening</b>                                             | <b>76</b> |
| <b>12</b> | <b>HPLC Chromatograms for Solvent Screening</b>                                              | <b>87</b> |

## 1. General remarks

All reactions were carried out in a flame dried flask. Solvents used for reactions and column chromatography were commercial grade and distilled prior to use. THF, toluene and dioxane were dried over sodium/benzophenone, whereas dichloromethane (DCM) and dichloroethane (DCE) were dried over  $\text{CaH}_2$ . Solvents (hexane, ethyl acetate) TLC was performed on pre-coated Merck silica gel aluminium plates with 60F254 indicator, visualised by irradiation with UV light. Column chromatography was performed using silica gel Merck 100-200 and 230-400 mesh.  $^1\text{H}$ -NMR and  $^{13}\text{C}$  NMR were recorded on 400 MHz, 500 MHz and 100 and 125 MHz using  $\text{CDCl}_3$  as solvent and multiplicity indicated as follows: s (singlet), d (doublet), t (triplet), q (quartet), m (multiplet), dd (doublet of doublet), dt (doublet of triplet), td (triplet of doublet), ddd (doublet of doublet of doublet) qd (quartet of doublet). Coupling constants  $J$  are reported in Hz. Chemical shift are represent in  $\delta$ . High resolution mass spectra were obtained by ESI using orbitrap elite mass spectrometer; IR spectra were recorded on a FT/IR-420 spectrometer and are reported in terms of frequency of absorption ( $\text{cm}^{-1}$ ). Melting points were measured in open capillaries and are uncorrected. Optical rotations are reported as follows:  $[\alpha]_{\text{D}}^{25}$  (c in g per 100 mL, solvent). The 2-substituted benzofuran3 (2h)-ones <sup>1</sup> and Catalysts<sup>2</sup>, 2-enoylpyridine<sup>3</sup> were synthesized from the literature procedure.

## 2. Representative experimental procedure for the synthesis of Michael addition products (4).

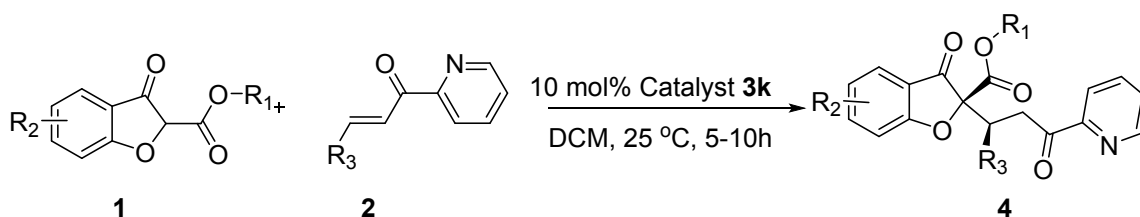

To a stirred solution of 2-enoyl pyridine **2** (1.2equ) and catalyst **3k** (0.10equ) in dry DCM (0.5ml) was added methyl 3-oxo-2,3-dihydrobenzofuran-2-carboxylate **1** (1equ) at room temperature. The reaction mixture was stirred at rt till the consumption of methyl 3-oxo-2, 3-dihydrobenzofuran-2-carboxylate, which was monitored by TLC. The crude mixture was purified by flash column chromatography over silica gel (80:20 hexane/EtOAc) to furnish **4a-4t**. To synthesize enantiomer of product **4**, the same reaction procedure was followed using catalyst **3l** and acetonitrile as solvent.

### 3. Analytical data for Michael addition product.

#### Methyl (S)-3-oxo-2-((S)-3-oxo-1-phenyl-3-(pyridin-2-yl)propyl)-2,3-dihydrobenzofuran-2-carboxylate(4a)

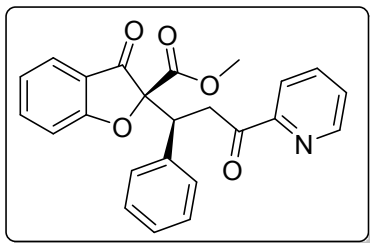

General experimental procedure **II** was followed to prepare the Michael addition product **4a**. The desired product was obtained as semi solid (102 mg, 98% yield). <sup>1</sup>H NMR (500MHz, CDCl<sub>3</sub>) δ = 8.70 - 8.69 (m, 1 H), 7.89 (d, *J* = 7.9 Hz, 1 H), 7.76 (dt, *J* = 1.7, 7.6 Hz, 1 H), 7.53 (ddd, *J* = 1.4, 7.2, 8.4 Hz, 1 H), 7.44 (ddd, *J* = 1.3, 4.7, 7.6 Hz, 1 H), 7.37 - 7.31 (m, 1 H), 7.30 - 7.26 (m, 2 H), 7.19 (d, *J* = 8.5 Hz, 1 H), 7.04 - 6.93 (m, 3 H), 6.91 (t, *J* = 7.3 Hz, 1 H), 4.68 (dd, *J* = 3.6, 10.6 Hz, 1 H), 4.40 (dd, *J* = 10.6, 17.8 Hz, 1 H), 3.80 (s, 3 H), 3.59 (dd, *J* = 3.8, 18.0 Hz, 1 H). <sup>13</sup>C NMR (126MHz, CDCl<sub>3</sub>) δ = 198.4, 194.5, 172.4, 166.0, 153.1, 148.9, 138.3, 136.8, 136.2, 129.5, 127.9, 127.3, 127.2, 124.6, 122.4, 121.9, 119.9, 113.1, 93.9, 53.5, 44.9, 38.9. IR (ν, cm<sup>-1</sup>): 3056, 2955, 2924, 2851, 1749, 1722, 1700, 1609, 1586, 1491, 1460, 1435, 1403, 1361, 1324, 1297, 1233, 1196, 1146, 1100, 1073, 1023, 956, 881, 830, 796, 755, 643, 618; HRMS (ESI): Exact mass calcd for C<sub>24</sub>H<sub>19</sub>NO<sub>5</sub> [M+Na]<sup>+</sup>: 424.1155, Found 424.1145. [α]<sub>D</sub><sup>26</sup> = -137.76 (*c* 2.50, CHCl<sub>3</sub>). The compound **4a** 97% ee was determined by chiral HPLC column (Phenomenex Amylose-2, hexane/*i*-PrOH = 80:20, flow rate = 1.0 mL/min, λ = 254 nm), *t*R (major) = 21.90 min, *t*R (minor) = 42.02 min.

#### Methyl (R)-3-oxo-2-((R)-3-oxo-1-phenyl-3-(pyridin-2-yl)propyl)-2,3-dihydrobenzofuran-2-carboxylate(ent-4a)

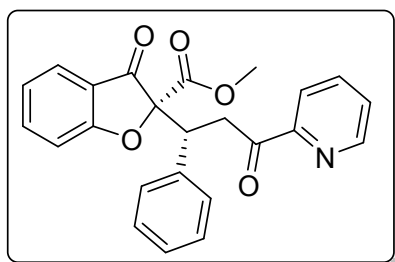

General experimental procedure **II** was followed to prepare the Michael addition product **ent-4a**. The desired product was obtained as semi solid (51mg, 96% yield, *dr* 85:15). <sup>1</sup>H NMR (500MHz, CDCl<sub>3</sub>) corresponding to **4a**. <sup>13</sup>C NMR (126MHz, CDCl<sub>3</sub>) corresponding to **4a**. [α]<sub>D</sub><sup>26</sup> = +174.93 (*c* 2.25, CHCl<sub>3</sub>). The major diastereomer of compound **ent-4a** 98% ee was determined by chiral HPLC column (Phenomenex Amylose-2, hexane/*i*-PrOH = 80:20, flow rate = 1.0 mL/min, λ = 254 nm), *t*R (major) = 54.212 min, *t*R (minor) = 29.56 min.

#### Methyl (S)-2-((S)-1-(2-fluorophenyl)-3-oxo-3-(pyridin-2-yl)propyl)-3-oxo-2,3-dihydrobenzofuran-2-carboxylate(4b)

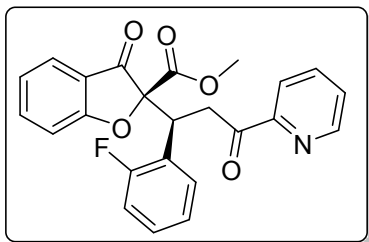

General experimental procedure **II** was followed to prepare the Michael addition product **4b**. The desired product was obtained

as semi solid (97 mg, 89% yield).  $^1\text{H}$  NMR (500MHz,  $\text{CDCl}_3$ )

$\delta$  = 8.69 (qd,  $J$  = 0.8, 4.7 Hz, 1 H), 7.93 - 7.88 (m, 1 H), 7.77

(dt,  $J$  = 1.6, 7.7 Hz, 1 H), 7.57 (ddd,  $J$  = 1.4, 7.1, 8.5 Hz, 1 H),

7.46 (ddd,  $J$  = 1.3, 4.7, 7.6 Hz, 1 H), 7.39 (dd,  $J$  = 0.8, 7.7 Hz, 1 H), 7.29 - 7.24 (m, 1 H), 7.23

(d,  $J$  = 8.5 Hz, 1 H), 6.97 - 6.94 (m, 2 H), 6.87 (ddd,  $J$  = 0.9, 8.4, 9.9 Hz, 1 H), 6.78 - 6.71 (m,

1 H), 5.06 (dd,  $J$  = 3.8, 10.7 Hz, 1 H), 4.35 (dd,  $J$  = 10.7, 18.3 Hz, 1 H), 3.82 (s, 3 H), 3.71 (dd,

$J$  = 3.6, 18.1 Hz, 1 H).  $^{13}\text{C}$  NMR (126MHz,  $\text{CDCl}_3$ )  $\delta$  = 198.2, 194.0, 172.4, 165.7, 161.7 (d,  $J$

= 249.5 Hz), 152.9, 149.0, 138.4, 136.8, 129.7, 129.1 (d,  $J$  = 8.49 Hz), 127.3, 124.8, 123.9 (d,

$J$  = 14.11 Hz), 123.6 (d,  $J$  = 3.47 Hz), 122.5, 121.8, 119.7, 115.7 (d,  $J$  = 23.24 Hz), 113.1,

93.4, 53.6, 38.8, 36.8. IR (v,  $\text{cm}^{-1}$ ): 3059, 2955, 2924, 2852, 1750, 1724, 1703, 1610, 1461,

1437, 1361, 1324, 1297, 1237, 1147, 1073, 1025, 992, 957, 882, 831, 759, 704, 644, 619;

HRMS (ESI): Exact mass calcd for  $\text{C}_{24}\text{H}_{18}\text{O}_5\text{NF}$   $[\text{M}+\text{Na}]^+$ : 442.1061, Found 442.1054.  $[\alpha]_{\text{D}}^{27.4}$

= -35.778 ( $c$  2.25,  $\text{CHCl}_3$ ). The compound **4b** 92% ee was determined by chiral HPLC column

(Chiralpak IG, hexane/*i*-PrOH = 80:10, flow rate = 1.0 mL/min,  $\lambda$  = 254 nm),  $t_{\text{R}}$  (major) =

24.08 min,  $t_{\text{R}}$  (minor) = 35.78 min.

**Methyl (R)-2-((R)-1-(2-fluorophenyl)-3-oxo-3-(pyridin-2-yl)propyl)-3-oxo-2,3-dihydrobenzofuran-2-carboxylate(ent-4b)**

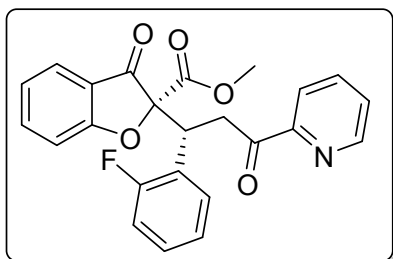

General experimental procedure **II** was followed to prepare the

Michael addition product **ent-4b**. The desired product was

obtained as semi solid (51mg, 92% yield, *dr* 72:26).  $^1\text{H}$  NMR

(500MHz,  $\text{CDCl}_3$ ) corresponding to **4b**.  $^{13}\text{C}$  NMR (126MHz,

$\text{CDCl}_3$ ) corresponding to **4b**.  $[\alpha]_{\text{D}}^{26}$  = +105.88 ( $c$  2.5,  $\text{CHCl}_3$ ).

The major diastereomer of compound **ent-4b** 97% ee was determined by chiral HPLC column

(Chiralpak AD-H, hexane/*i*-PrOH = 90:10, flow rate = 1.0 mL/min,  $\lambda$  = 254 nm),  $t_{\text{R}}$  (major) =

38.49 min,  $t_{\text{R}}$  (minor) = 26.03 min. The minor diastereomer of compound **ent-4b** 98% ee was

determined by chiral HPLC column (Chiralpak AD-H, hexane/*i*-PrOH = 90:10, flow rate = 1.0

mL/min,  $\lambda$  = 254 nm),  $t_{\text{R}}$  (major) = 29.88 min,  $t_{\text{R}}$  (minor) = 42.05 min.

**Methyl (S)-2-((S)-1-(2-bromophenyl)-3-oxo-3-(pyridin-2-yl)propyl)-3-oxo-2,3-dihydrobenzofuran-2-carboxylate (4c)**

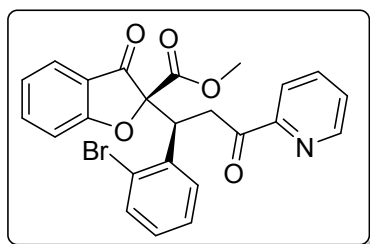

General experimental procedure **II** was followed to prepare the Michael addition product **4c**. The desired product was obtained

as foamy solid (116 mg, 93% yield). <sup>1</sup>H NMR (500MHz, CDCl<sub>3</sub>) δ = 8.70 - 8.69 (m, 1 H), 7.92 (td, *J* = 0.9, 7.9 Hz, 1 H),

7.77 (dt, *J* = 1.9, 7.7 Hz, 1 H), 7.59 (ddd, *J* = 1.4, 7.2, 8.4 Hz,

1 H), 7.46 (dtd, *J* = 1.3, 4.6, 7.6 Hz, 2 H), 7.41 (dd, *J* = 0.8, 7.7 Hz, 1 H), 7.36 - 7.34 (m, 1 H),

7.25 (s, 1 H), 7.00 - 6.96 (m, 1 H), 6.89 - 6.86 (m, 2 H), 5.31 (dd, *J* = 3.8, 10.4 Hz, 1 H), 4.27

(dd, *J* = 10.2, 17.8 Hz, 1 H), 3.86 - 3.82 (m, 3 H), 3.80 (d, *J* = 3.8 Hz, 1 H). <sup>13</sup>C NMR (126MHz,

CDCl<sub>3</sub>) δ = 198.3, 193.3, 172.2, 165.7, 152.9, 148.9, 138.3, 136.8, 136.6, 133.4, 129.0, 128.7,

127.3, 127.0, 124.9, 122.6, 121.9, 119.8, 113.1, 93.3, 53.7, 42.1, 40.0. IR (ν, cm<sup>-1</sup>): 3060, 2954,

2925, 2851, 1751, 1725, 1702, 1610, 1467, 1435, 1404, 1359, 1297, 1242, 1195, 1146, 1077,

1024, 992, 882, 760, 705, 649, 619; HRMS (ESI): Exact mass calcd for C<sub>24</sub>H<sub>18</sub>O<sub>5</sub>NBr [M+Na]<sup>+</sup>:

502.0261, Found 502.0260. The compound **4c** 92% ee was determined by chiral HPLC column

(Chiralpak AD-H, hexane/i-PrOH = 90:10, flow rate = 1.0 mL/min, λ = 254 nm), *t*R (major) =

30.41 min, *t*R (minor) = 40.91 min.

**Methyl (S)-2-((S)-1-(2-nitrophenyl)-3-oxo-3-(pyridin-2-yl)propyl)-3-oxo-2,3-dihydrobenzofuran-2-carboxylate (4d)**

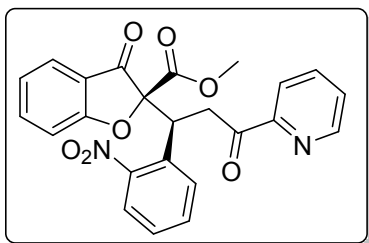

General experimental procedure **II** was followed to prepare the Michael addition product **4d**. The desired product was obtained

as foamy solid (100 mg, 86% yield). <sup>1</sup>H NMR (500MHz, CDCl<sub>3</sub>)

δ = 8.71 - 8.70 (m, 1 H), 7.93 (td, *J* = 0.9, 7.9 Hz, 1 H), 7.79 (dt,

*J* = 1.9, 7.7 Hz, 1 H), 7.77 - 7.72 (m, 1 H), 7.64 - 7.56 (m, 2 H),

7.50 - 7.43 (m, 2 H), 7.26 - 7.21 (m, 3 H), 7.04 - 7.01 (m, 1 H), 5.49 (dd, *J* = 4.6, 9.6 Hz, 1 H),

4.23 (dd, *J* = 9.5, 17.7 Hz, 1 H), 4.11 (dd, *J* = 4.6, 17.8 Hz, 1 H), 3.80 (s, 3 H). <sup>13</sup>C NMR

(126MHz, CDCl<sub>3</sub>) δ = 198.2, 193.6, 171.8, 165.3, 152.8, 150.9, 149.0, 138.7, 136.9, 132.1,

131.7, 129.3, 128.2, 127.4, 125.1, 124.9, 122.9, 121.9, 119.6, 113.3, 92.5, 53.7, 38.7, 37.5. IR

(ν, cm<sup>-1</sup>): 3058, 2954, 2873, 1751, 1723, 1609, 1530, 1468, 1438, 1354, 1298, 1242, 1194,

1144, 1096, 1059, 992, 955, 888, 857, 760; HRMS (ESI): Exact mass calcd for C<sub>24</sub>H<sub>18</sub>N<sub>2</sub>O<sub>7</sub>

[M+Na]<sup>+</sup>: 469.1006., Found 469.1003. [ $\alpha$ ]<sub>D</sub><sup>26.6</sup> = -12,480 (*c* 2.50, CHCl<sub>3</sub>). The compound **4d**

88% ee was determined by chiral HPLC column (Chiralpak AD-H, hexane/i-PrOH = 90:10,

flow rate = 1.0 mL/min, λ = 254 nm), *t*R (major) = 46.93 min, *t*R (minor) = 64.91 min.

**Methyl (S)-2-((S)-1-(4-fluorophenyl)-3-oxo-3-(pyridin-2-yl)propyl)-3-oxo-2,3-dihydrobenzofuran-2-carboxylate (4e)**

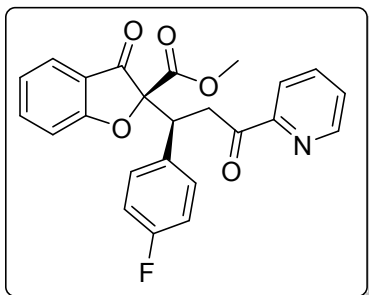

General experimental procedure **II** was followed to prepare the Michael addition product **4e**. The desired product was obtained as yellow foamy solid (104 mg, 95% yield).  $^1\text{H}$  NMR (500MHz,  $\text{CDCl}_3$ )  $\delta$  = 8.72 - 8.67 (m, 1 H), 7.89 (td,  $J$  = 1.2, 7.7 Hz, 1 H), 7.77 (dt,  $J$  = 1.7, 7.6 Hz, 1 H), 7.56 (ddd,  $J$  = 1.4, 7.1, 8.5 Hz, 1 H), 7.46 (ddd,  $J$  = 1.3, 4.9, 7.4 Hz, 1 H), 7.38 - 7.34 (m, 1 H), 7.28 - 7.23 (m, 3 H), 7.20 (d,  $J$  = 8.5 Hz, 1 H), 6.98 - 6.91 (m, 1 H), 6.73 - 6.66 (m, 2 H), 4.68 (dd,  $J$  = 3.6, 10.9 Hz, 1 H), 4.38 (dd,  $J$  = 10.9, 17.8 Hz, 1 H), 3.81 (s, 3 H), 3.59 - 3.51 (m, 1 H).  $^{13}\text{C}$  NMR (126MHz,  $\text{CDCl}_3$ )  $\delta$  = 198.4, 194.5, 172.4, 165.8, 162.9 (d,  $J$  = 246.4 Hz), 152.9, 149.0, 138.5, 136.9, 131.9 (d,  $J$  = 3.24 Hz), 131.1 (d,  $J$  = 7.60 Hz), 127.3, 124.7, 122.6, 121.9, 119.8, 115.0 (d,  $J$  = 21.27 Hz), 113.0, 93.8, 53.6, 44.1, 39.0. IR ( $\nu$ ,  $\text{cm}^{-1}$ ): 3055, 2954, 2925, 2851, 1750, 1723, 1609, 1509, 1467, 1358, 1324, 1297, 1231, 1153, 1100, 1074, 1024, 993, 957, 886, 838, 753, 652, 621; HRMS (ESI): Exact mass calcd for  $\text{C}_{24}\text{H}_{18}\text{O}_5\text{NF}$   $[\text{M}+\text{Na}]^+$ : 442.1061, Found 442.1055.  $[\alpha]_{\text{D}}^{26}$  = -12.48 ( $c$  2.50,  $\text{CHCl}_3$ ). The compound **4e** 90% ee was determined by chiral HPLC column (Phenomenex Amylose-2, hexane/*i*-PrOH = 80:20, flow rate = 1.0 mL/min,  $\lambda$  = 254 nm),  $t_{\text{R}}$  (major) = 23.41 min,  $t_{\text{R}}$  (minor) = 40.51 min.

**Methyl (R)-2-((R)-1-(4-fluorophenyl)-3-oxo-3-(pyridin-2-yl)propyl)-3-oxo-2,3-dihydrobenzofuran-2-carboxylate(ent-4e)**

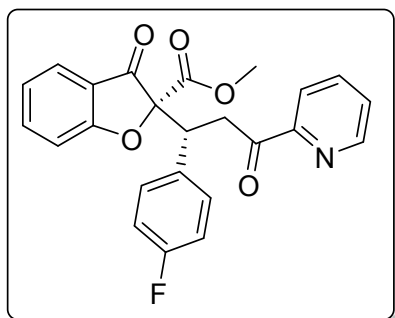

General experimental procedure **II** was followed to prepare the Michael addition product **ent-4e**. The desired product was obtained as semi solid (52 mg, 94% yield, *dr* 83:17).  $^1\text{H}$  NMR (500MHz,  $\text{CDCl}_3$ ) corresponding to **4e**.  $^{13}\text{C}$  NMR (126MHz,  $\text{CDCl}_3$ ) corresponding to **4e**.  $[\alpha]_{\text{D}}^{26}$  = +134.68 ( $c$  2.5,  $\text{CHCl}_3$ ). The major diastereomer of compound **ent-4e** 96% ee was determined by chiral HPLC column (Phenomenex Amylose-2, hexane/*i*-PrOH = 80:20, flow rate = 1.0 mL/min,  $\lambda$  = 254 nm),  $t_{\text{R}}$  (major) = 44.51 min,  $t_{\text{R}}$  (minor) = 24.58 min. The minor diastereomer of compound **ent-4e** 97% ee was determined by chiral HPLC column (Phenomenex Amylose-2, hexane/*i*-PrOH = 80:20, flow rate = 1.0 mL/min,  $\lambda$  = 254 nm),  $t_{\text{R}}$  (major) = 36.63 min,  $t_{\text{R}}$  (minor) = 62.48 min.

**Methyl (S)-2-((S)-1-(4-chlorophenyl)-3-oxo-3-(pyridin-2-yl)propyl)-3-oxo-2,3-dihydrobenzofuran-2-carboxylate (4f)**

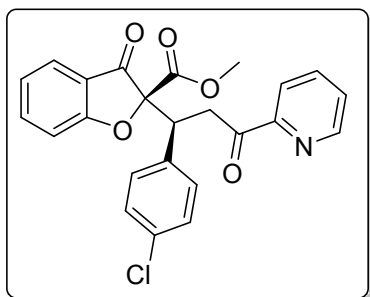

General experimental procedure **II** was followed to prepare the Michael addition product **4f**. The desired product was obtained as foamy solid (102 mg, 90% yield). <sup>1</sup>H NMR (500MHz, CDCl<sub>3</sub>) δ = 8.70 - 8.69 (m, 1 H), 7.89 (td, *J* = 1.2, 7.7 Hz, 1 H), 7.77 (dt, *J* = 1.6, 7.7 Hz, 1 H), 7.57 (ddd, *J* = 1.4, 7.2, 8.4 Hz, 1 H), 7.46 (ddd, *J* = 1.3, 4.9, 7.4 Hz, 1 H), 7.24 - 7.20 (m, 4 H), 7.00 - 6.96 (m, 3 H), 4.67 (dd, *J* = 3.3, 10.9 Hz, 1 H), 4.39 (dd, *J* = 10.7, 18.0 Hz, 1 H), 3.80 (s, 3 H), 3.55 (dd, *J* = 3.5, 18.0 Hz, 1 H). <sup>13</sup>C NMR (126MHz, CDCl<sub>3</sub>) δ = 198.3, 194.4, 172.4, 165.8, 152.8, 149.0, 138.6, 136.9, 134.8, 133.2, 130.8, 128.2, 127.4, 124.8, 122.7, 121.9, 119.8, 113.1, 93.7, 53.7, 44.1, 38.9. IR (ν, cm<sup>-1</sup>): 3034, 2958, 2923, 1749, 1722, 1609, 1467, 1436, 1358, 1324, 1296, 1241, 1195, 1146, 1096, 1021, 992, 884, 833, 762, 704, 677, 648; HRMS (ESI): Exact mass calcd for C<sub>24</sub>H<sub>18</sub>O<sub>5</sub>NCl [M+Na]<sup>+</sup>: 458.0766, Found 458.0762. [α]<sub>D</sub><sup>27.4</sup> = +0.5320 (*c* 2.50, CHCl<sub>3</sub>). The compound **4f** 84% ee was determined by chiral HPLC column (Chiralpak AS-H, hexane/*i*-PrOH = 90:10, flow rate = 0.5 mL/min, λ = 254 nm), *t*R (major) = 43.21 min, *t*R (minor) = 35.11 min.

**Methyl (R)-2-((R)-1-(4-chlorophenyl)-3-oxo-3-(pyridin-2-yl)propyl)-3-oxo-2,3-dihydrobenzofuran-2-carboxylate (ent-4f)**

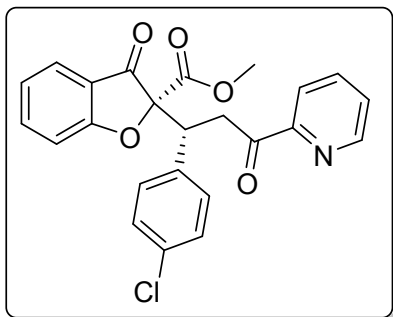

General experimental procedure **II** was followed to prepare the Michael addition product **ent-4f**. The desired product was obtained as semi solid (52 mg, 91% yield, *dr* 79:21). <sup>1</sup>H NMR (500MHz, CDCl<sub>3</sub>) corresponding to **4f**. <sup>13</sup>C NMR (126MHz, CDCl<sub>3</sub>) corresponding to **4f**. [α]<sub>D</sub><sup>26</sup> = +126.68 (*c* 2.5, CHCl<sub>3</sub>). The major diastereomer of compound **ent-4f** 98% ee was determined by chiral HPLC column (Chiralpak AS-H, hexane/*i*-PrOH = 90:10, flow rate = 0.5 mL/min, λ = 254 nm), *t*R (major) = 35.26 min, *t*R (minor) = 43.44 min. The minor diastereomer of compound **ent-4f** 96% ee was determined by chiral HPLC column (Chiralpak AS-H, hexane/*i*-PrOH = 90:10, flow rate = 0.5 mL/min, λ = 254 nm), *t*R (major) = 39.05 min, *t*R (minor) = 66.98 min.

**Methyl (S)-2-((S)-1-(4-bromophenyl)-3-oxo-3-(pyridin-2-yl)propyl)-3-oxo-2,3-dihydrobenzofuran-2-carboxylate (4g)**

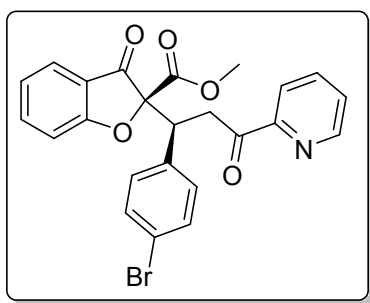

General experimental procedure **II** was followed to prepare the Michael Addition product **4g**. The desired product was obtained as white foamy solid (122 mg, 98% yield).  $^1\text{H}$  NMR (500MHz,  $\text{CDCl}_3$ )  $\delta$  = 8.72 (d,  $J$  = 4.4 Hz, 1 H), 7.92 (d,  $J$  = 7.9 Hz, 1 H), 7.78 (dt,  $J$  = 1.7, 7.6 Hz, 1 H), 7.61 - 7.58 (m, 1 H), 7.46 (ddd,  $J$  = 1.3, 4.7, 7.6 Hz, 1 H), 7.41 - 7.39 (m, 1 H), 7.23 - 7.15 (m, 5 H), 6.97 (t,  $J$  = 7.4 Hz, 1 H), 4.65 (dd,  $J$  = 3.5, 10.7 Hz, 1 H), 4.38 (dd,  $J$  = 10.9, 18.1 Hz, 1 H), 3.80 (s, 3 H), 3.54 (dd,  $J$  = 3.5, 18.0 Hz, 1 H).  $^{13}\text{C}$  NMR (126MHz,  $\text{CDCl}_3$ )  $\delta$  = 198.2, 194.3, 172.4, 165.7, 152.9, 149.0, 138.6, 136.9, 135.4, 131.1, 127.4, 124.9, 122.7, 121.9, 121.5, 119.8, 113.1, 93.7, 53.7, 44.1, 38.9. IR ( $\nu$ ,  $\text{cm}^{-1}$ ): 3058, 2954, 2925, 2852, 1750, 1723, 1701, 1611, 1476, 1462, 1357, 1325, 1298, 1246, 1196, 1146, 1076, 1025, 993, 881, 832, 796, 759, 667, 617; HRMS (ESI): Exact mass calcd for  $\text{C}_{24}\text{H}_{18}\text{O}_5\text{NBr}$   $[\text{M}+\text{Na}]^+$ : 502.0261, Found 502.0259.  $[\alpha]_{\text{D}}^{26}$  = -114.80 ( $c$  3.0,  $\text{CHCl}_3$ ). The compound **4g** 92% ee was determined by chiral HPLC column (Chiralpak AS-H, hexane/*i*-PrOH = 95:5, flow rate = 0.5 mL/min,  $\lambda$  = 254 nm),  $t_{\text{R}}$  (major) = 69.86 min,  $t_{\text{R}}$  (minor) = 57.30 min.

**Methyl (R)-2-((R)-1-(4-bromophenyl)-3-oxo-3-(pyridin-2-yl)propyl)-3-oxo-2,3-dihydrobenzofuran-2-carboxylate(ent-4g)**

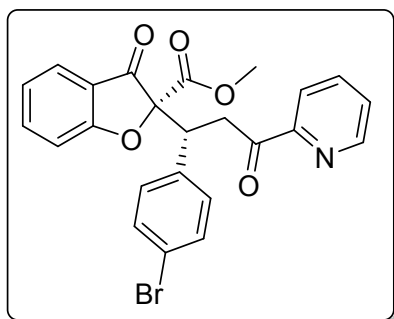

General experimental procedure **II** was followed to prepare the Michael addition product **ent-4g**. The desired product was obtained as semi solid (59 mg, 95% yield, *dr* 72:28).  $^1\text{H}$  NMR (500MHz,  $\text{CDCl}_3$ ) corresponding to **4g**.  $^{13}\text{C}$  NMR (126MHz,  $\text{CDCl}_3$ ) corresponding to **4g**. The major diastereomer of compound **ent-4g** 84% ee was determined by chiral HPLC column (Chiralpak AS-H, hexane/*i*-PrOH = 90:10, flow rate = 0.5 mL/min,  $\lambda$  = 254 nm),  $t_{\text{R}}$  (major) = 37.17 min,  $t_{\text{R}}$  (minor) = 45.04 min. The minor diastereomer of compound **ent-4g** 90% ee was determined by chiral HPLC column (Chiralpak AS-H, hexane/*i*-PrOH = 95:05, flow rate = 0.5 mL/min,  $\lambda$  = 254 nm),  $t_{\text{R}}$  (major) = 61.99 min,  $t_{\text{R}}$  (minor) = 76.25 min.

**Methyl (S)-2-((S)-1-(furan-2-yl)-3-oxo-3-(pyridin-2-yl)propyl)-3-oxo-2,3-dihydrobenzofuran-2-carboxylate (4h)**

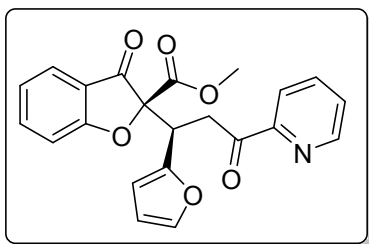

General experimental procedure **II** was followed to prepare the Michael Addition product **4h**. The desired product was obtained as semi solid (92 mg, 91% yield).  $^1\text{H}$  NMR (500MHz,  $\text{CDCl}_3$ )  $\delta$  = 8.72 - 8.70 (m, 1 H), 8.00 - 7.96 (m, 1 H), 7.81 (dt,  $J$  = 1.6, 7.7 Hz, 1 H), 7.58 (ddd,  $J$  = 1.4, 7.1, 8.5 Hz, 1 H), 7.51 - 7.49 (m, 2 H), 7.20 (d,  $J$  = 8.5 Hz, 1 H), 7.02 - 6.99 (m, 2 H), 6.08 (d,  $J$  = 3.2 Hz, 1 H), 5.99 (dd,  $J$  = 1.9, 3.2 Hz, 1 H), 4.81 (dd,  $J$  = 3.5, 10.7 Hz, 1 H), 3.80 (s, 3 H), 3.55 (dd,  $J$  = 3.3, 18.1 Hz, 1 H).  $^{13}\text{C}$  NMR (126 MHz,  $\text{CDCl}_3$ )  $\delta$  = 198.1, 194.4, 172.5, 165.5, 152.9, 150.2, 149.0, 141.8, 138.3, 136.9, 127.3, 124.7, 122.5, 121.9, 119.4, 113.3, 110.0, 108.7, 92.8, 53.6, 38.9, 37.2. IR (v,  $\text{cm}^{-1}$ ): 3034, 2958, 2923, 1751, 1725, 1703, 1610, 1500, 1462, 1357, 1325, 1298, 1280, 1196, 1147, 1079, 1019, 993, 913, 878, 756, 618; HRMS (ESI): Exact mass calcd for  $\text{C}_{22}\text{H}_{17}\text{NO}_6$   $[\text{M}+\text{Na}]^+$ : 414.0948, Found 414.0939.  $[\alpha]_{\text{D}}^{27.4}$  = -50.844 ( $c$  2.25,  $\text{CHCl}_3$ ). The compound **4h** 86% ee was determined by chiral HPLC column (Chiralpak AS-H, hexane/ $i$ -PrOH = 95:05, flow rate = 1.0 mL/min,  $\lambda$  = 254 nm),  $t_{\text{R}}$  (major) = 46.24 min,  $t_{\text{R}}$  (minor) = 43.48 min.

**Methyl (S)-5-chloro-3-oxo-2-((S)-3-oxo-1-phenyl-3-(pyridin-2-yl)propyl)-2,3-dihydrobenzofuran-2-carboxylate (4i)**

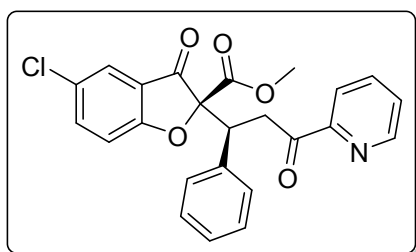

General experimental procedure **II** was followed to prepare the Michael Addition product **4i**. The desired product was obtained as yellow foamy solid (100mg, 88% yield).  $^1\text{H}$  NMR (500MHz,  $\text{CDCl}_3$ )  $\delta$  = 8.70 - 8.69 (m, 1 H), 7.89 (td,  $J$  = 0.9, 7.9 Hz, 1 H), 7.77 (dt,  $J$  = 1.9, 7.7 Hz, 1 H), 7.49 - 7.43 (m, 2 H), 7.29 (d,  $J$  = 1.9 Hz, 1 H), 7.29 - 7.25 (m, 2 H), 7.15 (d,  $J$  = 8.5 Hz, 1 H), 7.03 - 7.01 (m, 3 H), 4.68 (dd,  $J$  = 3.8, 10.7 Hz, 1 H), 4.39 (dd,  $J$  = 10.4, 18.0 Hz, 1 H), 3.81 (s, 3 H), 3.58 - 3.54 (m, 1 H).  $^{13}\text{C}$  NMR (126MHz,  $\text{CDCl}_3$ )  $\delta$  = 198.3, 193.4, 170.7, 165.5, 152.9, 148.9, 138.2, 136.9, 135.9, 129.4, 128.1, 127.9, 127.6, 127.3, 124.0, 121.9, 121.0, 114.4, 94.9, 53.7, 44.8, 38.8. IR (v,  $\text{cm}^{-1}$ ): 3060, 2954, 1752, 1727, 1701, 1606, 1493, 1462, 1362, 1304, 1268, 1239, 1182, 1145, 1123, 1087, 1060, 994, 876, 824, 771, 735, 673; HRMS (ESI): Exact mass calcd for  $\text{C}_{24}\text{H}_{18}\text{O}_5\text{NCl}$   $[\text{M}+\text{Na}]^+$ : 458.0766, Found 458.0763.  $[\alpha]_{\text{D}}^{26}$  = -27.70 ( $c$  2.0,  $\text{CHCl}_3$ ). The compound **4i** 83% ee was determined by chiral HPLC column (Chiralpak AD-H, hexane/ $i$ -PrOH = 90:10, flow rate = 0.5 mL/min,  $\lambda$  = 254 nm),  $t_{\text{R}}$  (major) = 51.32 min,  $t_{\text{R}}$  (minor) = 65.11 min. After single recrystallization(3:7 mixture of DCM:Hexane) 99.36% ee was observed.

**Methyl (S)-5-bromo-3-oxo-2-((S)-3-oxo-1-phenyl-3-(pyridin-2-yl)propyl)-2,3-dihydrobenzofuran-2-carboxylate(4j)**

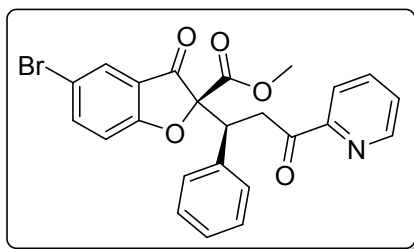

General experimental procedure **II** was followed to prepare the Michael Addition product **4j**. The desired product was obtained as foamy solid (106 mg, 85% yield). <sup>1</sup>H NMR (400MHz, CDCl<sub>3</sub>) δ = 8.70 - 8.69 (m, 1 H), 7.89 (td, *J* = 1.0, 7.8 Hz, 1 H), 7.79 - 7.76 (m, 1 H), 7.62 (dd, *J* = 2.2, 8.8 Hz, 1 H), 7.47 - 7.44 (m, 2 H), 7.27 - 7.25 (m, 3 H), 7.12 (d, *J* = 8.8 Hz, 1 H), 7.04 - 7.02 (m, 2 H), 4.68 (dd, *J* = 3.7, 10.5 Hz, 1 H), 4.39 (dd, *J* = 10.6, 17.9 Hz, 1 H), 3.81 (s, 3 H), 3.58 (d, *J* = 3.7 Hz, 1 H). <sup>13</sup>C NMR (101MHz, CDCl<sub>3</sub>) δ = 198.2, 193.2, 171.1, 165.4, 152.9, 148.9, 140.9, 136.9, 135.8, 129.4, 128.1, 127.6, 127.3, 127.1, 121.9, 121.5, 114.9, 114.8, 94.7, 53.7, 44.8, 38.8. IR (ν, cm<sup>-1</sup>): 3034, 2958, 2923, 1744, 1727, 1607, 1549, 1496, 1377, 1324, 1296, 1280, 1191, 1145, 1084, 1052, 982, 866, 818, 782, 701, 674, 562; HRMS (ESI): Exact mass calcd for C<sub>24</sub>H<sub>18</sub>O<sub>5</sub>NBr[M+Na]<sup>+</sup>: 502.0261, Found 502.0259. [α]<sub>D</sub><sup>28.3</sup> = -129.90 (*c* 2.0, CHCl<sub>3</sub>). The compound **4j** 74% ee was determined by chiral HPLC column (Chiralpak AS-H, hexane/i-PrOH = 90:10, flow rate = 0.50 mL/min, λ = 254 nm), *t*R (major) = 29.59 min, *t*R (minor) = 23.81 min.

**Methyl (S)-5-iodo-3-oxo-2-((S)-3-oxo-1-phenyl-3-(pyridin-2-yl)propyl)-2,3-dihydrobenzofuran-2-carboxylate (4k)**

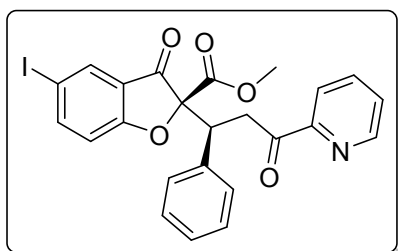

General experimental procedure **II** was followed to prepare the Michael Addition product **4k**. The desired product was obtained as foamy solid (114mg, 83% yield). <sup>1</sup>H NMR (500MHz, CDCl<sub>3</sub>) δ = 8.72 - 8.70 (m, 1 H), 7.91 - 7.89 (m, 1 H), 7.79 - 7.77 (m, 2 H), 7.65 (d, *J* = 1.9 Hz, 1 H), 7.47 (ddd, *J* = 1.3, 4.7, 7.6 Hz, 2 H), 7.29 - 7.26 (m, 2 H), 7.05 - 7.02 (m, 4 H), 4.69 (dd, *J* = 3.8, 10.4 Hz, 2 H), 4.40 (dd, *J* = 10.6, 17.8 Hz, 1 H), 3.81 (s, 3 H), 3.60 - 3.55 (m, 1 H). <sup>13</sup>C NMR (126MHz, CDCl<sub>3</sub>) δ = 198.2, 192.8, 171.8, 165.4, 152.9, 148.9, 146.9, 136.9, 135.9, 133.3, 129.4, 128.1, 127.6, 127.3, 122.2, 121.9, 115.3, 94.5, 84.6, 53.7, 44.7, 38.8. IR (ν, cm<sup>-1</sup>): 3060, 2955, 1750, 1725, 1701, 1599, 1494, 1435, 1362, 1271, 1239, 1177, 1146, 1087, 1026, 993, 895, 873, 767, 735, 705, 652; HRMS (ESI): Exact mass calcd for C<sub>24</sub>H<sub>18</sub>O<sub>5</sub>NI [M+Na]<sup>+</sup>: 550.0122, Found 550.0118. [α]<sub>D</sub><sup>26</sup> = +147.355 (*c* 1.55, CHCl<sub>3</sub>). The compound **4k** 70% ee was determined by

chiral HPLC column (AS-H, hexane/i-PrOH = 90:10, flow rate = 1.0 mL/min,  $\lambda$  = 254 nm),  $t_R$  (major) = 21.96 min,  $t_R$  (minor) = 17.50 min.

**Methyl (S)-5-methoxy-3-oxo-2-((S)-3-oxo-1-phenyl-3-(pyridin-2-yl)propyl)-2,3-dihydrobenzofuran-2-carboxylate(4l)**

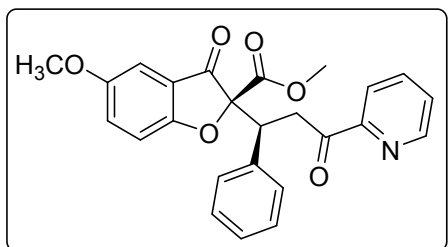

General experimental procedure **II** was followed to prepare the Michael Addition product **4l**. The desired product was obtained as colourless solid (88 mg, 78% yield).  $^1\text{H}$  NMR (400MHz,  $\text{CDCl}_3$ )  $\delta$  = 8.70 - 8.69 (m, 1 H), 7.89 (td,  $J$  = 1.0, 7.9 Hz, 1 H), 7.76 (dt,  $J$  = 1.7, 7.7 Hz, 1 H), 7.45 (ddd,  $J$  = 1.3, 4.8, 7.5 Hz, 1 H), 7.30 - 7.27 (m, 2 H), 7.15 - 7.10 (m, 2 H), 7.04 - 6.98 (m, 3 H), 6.72 (d,  $J$  = 2.4 Hz, 1 H), 4.67 (dd,  $J$  = 3.7, 10.5 Hz, 1 H), 4.39 (dd,  $J$  = 10.6, 17.9 Hz, 1 H), 3.83 - 3.77 (m, 3 H), 3.66 (s, 3 H), 3.59 - 3.54 (m, 1 H).  $^{13}\text{C}$  NMR (101MHz,  $\text{CDCl}_3$ )  $\delta$  = 198.4, 194.7, 167.9, 166.1, 155.0, 153.0, 148.9, 136.8, 136.2, 129.4, 128.4, 128.0, 127.3, 127.2, 121.8, 119.8, 113.9, 104.2, 94.7, 55.7, 53.6, 44.8, 39.0. IR (v,  $\text{cm}^{-1}$ ): 3034, 2958, 2923, 1754, 1737, 1610, 1549, 1496, 1377, 1324, 1296, 1280, 1191, 1145, 1084, 1052, 982, 866, 818, 782, 701, 674; HRMS (ESI): Exact mass calcd for  $\text{C}_{25}\text{H}_{21}\text{NO}_6$   $[\text{M}+\text{Na}]^+$ : 454.1261, Found 454.1259.  $[\alpha]_{\text{D}}^{28.3}$  = -43.866 ( $c$  1.75,  $\text{CHCl}_3$ ). The compound **4l** 90% ee was determined by chiral HPLC column (Chiralpak IG, hexane/i-PrOH = 90:10, flow rate = 1.0 mL/min,  $\lambda$  = 254 nm),  $t_R$  (major) = 92.18 min,  $t_R$  (minor) = 104.52 min.

**Ethyl (S)-3-oxo-2-((S)-3-oxo-1-phenyl-3-(pyridin-2-yl)propyl)-2,3-dihydrobenzofuran-2-carboxylate (4m)**

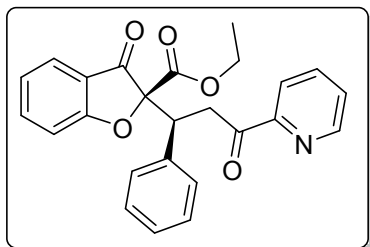

General experimental procedure **II** was followed to prepare the Michael Addition product **4m**. The desired product was obtained as foamy solid (98 mg, 91% yield).  $^1\text{H}$  NMR (500MHz,  $\text{CDCl}_3$ )  $\delta$  = 8.73 - 8.67 (m, 1 H), 7.88 (td,  $J$  = 0.9, 7.9 Hz, 1 H), 7.75 (dt,  $J$  = 1.7, 7.6 Hz, 1 H), 7.53 (ddd,  $J$  = 1.4, 7.2, 8.4 Hz, 1 H), 7.44 (ddd,  $J$  = 1.3, 4.8, 7.5 Hz, 1 H), 7.35 - 7.31 (m, 1 H), 7.31 - 7.26 (m, 2 H), 7.20 (d,  $J$  = 8.5 Hz, 1 H), 7.03 - 6.92 (m, 3 H), 6.92 - 6.88 (m, 1 H), 4.70 (dd,  $J$  = 3.5, 10.7 Hz, 1 H), 4.42 (dd,  $J$  = 10.7, 17.7 Hz, 1 H), 4.27 (q,  $J$  = 7.3 Hz, 2 H), 3.58 (dd,  $J$  = 3.5, 18.0 Hz, 1 H), 1.27 (t,  $J$  = 7.1 Hz, 3 H).  $^{13}\text{C}$  NMR (126MHz,  $\text{CDCl}_3$ )  $\delta$  = 198.5, 194.7, 172.5, 165.4, 153.0, 148.9, 138.2, 136.8, 136.2, 129.5, 127.9, 127.3, 127.2, 124.6, 122.3, 121.8, 119.9, 113.1, 94.0,

62.9, 44.8, 38.9, 14.0. IR ( $\nu$ ,  $\text{cm}^{-1}$ ): 3059, 2983, 2934, 1746, 1722, 1609, 1465, 1397, 1324, 1296, 1234, 1145, 1088, 1025, 992, 878, 859, 761, 702, 644; HRMS (ESI): Exact mass calcd for  $\text{C}_{25}\text{H}_{21}\text{NO}_5$   $[\text{M}+\text{Na}]^+$ : 438.1312, Found 438.1306.  $[\alpha]_{\text{D}}^{26} = -22.756$  ( $c$  2.25,  $\text{CHCl}_3$ ). The compound **4m** 90% ee was determined by chiral HPLC column (Phenomenex Amylose-2, hexane/*i*-PrOH = 80:20, flow rate = 1.0 mL/min,  $\lambda$  = 254 nm),  $t_{\text{R}}$  (major) = 27.09 min,  $t_{\text{R}}$  (minor) = 48.89 min.

**Ethyl (S)-6-methyl-3-oxo-2-((S)-3-oxo-1-phenyl-3-(pyridin-2-yl)propyl)-2,3-dihydrobenzofuran-2-carboxylate(4n)**

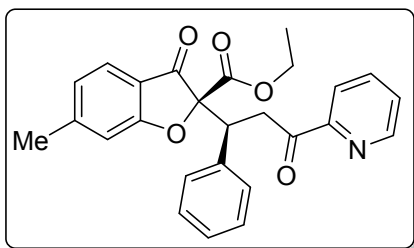

General experimental procedure **II** was followed to prepare the Michael Addition product **4n**. The desired product was obtained as foamy solid (96 mg, 98% yield).  $^1\text{H}$  NMR (500MHz,  $\text{CDCl}_3$ )  $\delta$  = 8.70 - 8.69 (m, 1 H), 7.87 (td,  $J$  = 1.1, 7.9 Hz, 1 H), 7.75 (dt,  $J$  = 1.7, 7.6 Hz, 1 H), 7.44 (ddd,  $J$  = 1.3, 4.7, 7.6 Hz, 1 H), 7.29 - 7.27 (m, 2 H), 7.22 (d,  $J$  = 7.9 Hz, 1 H), 7.02 - 6.96 (m, 4 H), 6.72 - 6.70 (m, 1 H), 4.69 (dd,  $J$  = 3.3, 10.9 Hz, 1 H), 4.40 (dd,  $J$  = 10.9, 17.8 Hz, 1 H), 4.26 (q,  $J$  = 7.1 Hz, 2 H), 3.56 (dd,  $J$  = 3.5, 17.7 Hz, 1 H), 2.38 (s, 3 H), 1.27 (t,  $J$  = 7.1 Hz, 3 H).  $^{13}\text{C}$  NMR (126MHz,  $\text{CDCl}_3$ )  $\delta$  = 198.5, 193.9, 173.0, 165.6, 153.1, 150.4, 148.9, 136.8, 136.4, 129.5, 127.9, 127.2, 127.2, 124.2, 123.9, 121.8, 117.6, 113.1, 94.3, 62.8, 44.6, 38.9, 22.6, 14.0. IR ( $\nu$ ,  $\text{cm}^{-1}$ ): 3059, 2982, 1745, 1718, 1616, 1495, 1454, 1363, 1328, 1282, 1233, 1140, 1089, 1029, 992, 860, 819, 773, 702, 667, 617; HRMS (ESI): Exact mass calcd for  $\text{C}_{26}\text{H}_{23}\text{NO}_5$   $[\text{M}+\text{Na}]^+$ : 452.1468, Found 452.1461.  $[\alpha]_{\text{D}}^{26} = +120.04$  ( $c$  2.25,  $\text{CHCl}_3$ ). The compound **4n** 98% ee was determined by chiral HPLC column (Phenomenex Amylose-2, hexane/*i*-PrOH = 80:20, flow rate = 1.0 mL/min,  $\lambda$  = 254 nm),  $t_{\text{R}}$  (major) = 30.94 min,  $t_{\text{R}}$  (minor) = 81.15 min.

**Ethyl (R)-6-methyl-3-oxo-2-((R)-3-oxo-1-phenyl-3-(pyridin-2-yl)propyl)-2,3-dihydrobenzofuran-2-carboxylate(ent-4n)**

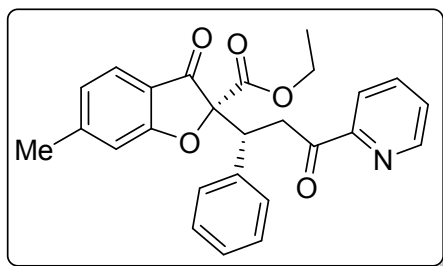

General experimental procedure **II** was followed to prepare the Michael addition product **ent-4n**. The desired product was obtained as semi solid (45 mg, 93% yield, *dr* 82:18).  $^1\text{H}$  NMR (500MHz,  $\text{CDCl}_3$ ) corresponding to **4n**.  $^{13}\text{C}$  NMR (126MHz,  $\text{CDCl}_3$ ) corresponding to **4n**.  $[\alpha]_{\text{D}}^{26} = +90.90$  ( $c$  2.0,  $\text{CHCl}_3$ ). The major diastereomer of compound **ent-4n** 95% ee was determined by chiral HPLC column (Phenomenex Amylose-2, hexane/*i*-PrOH = 80:20, flow

rate = 1.0 mL/min,  $\lambda$  = 254 nm),  $t_R$  (major) = 70.80 min,  $t_R$  (minor) = 28.82 min. The minor diastereomer of compound **ent-4n** 98% ee was determined by chiral HPLC column (Phenomenex Amylose-2, hexane/i-PrOH = 80:20, flow rate = 1.0 mL/min,  $\lambda$  = 254 nm),  $t_R$  (major) = 33.14 min,  $t_R$  (minor) = 63.79 min.

**Ethyl (S)-2-((S)-1-(2-fluorophenyl)-3-oxo-3-(pyridin-2-yl)propyl)-6-methyl-3-oxo-2,3-dihydrobenzofuran-2-carboxylate (4o)**

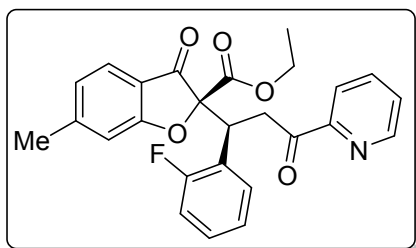

General experimental procedure **II** was followed to prepare the Michael Addition product **4o**. The desired product was obtained as foamy colourless solid (98 mg, 97% yield).  $^1\text{H}$  NMR (500MHz,  $\text{CDCl}_3$ )  $\delta$  = 8.69 - 8.66 (m, 1 H), 7.89 (td,  $J$  = 0.9, 7.9 Hz, 1 H), 7.76 (dt,  $J$  = 1.7, 7.6 Hz, 1 H), 7.45 (ddd,  $J$  = 1.3, 4.7, 7.6 Hz, 1 H), 7.30 - 7.27 (m, 2 H), 7.25 (s, 1 H), 7.03 (s, 1 H), 7.01 - 6.95 (m, 1 H), 6.86 (ddd,  $J$  = 1.3, 8.4, 9.9 Hz, 1 H), 6.77 - 6.75 (m, 2 H), 5.06 (dd,  $J$  = 3.5, 10.7 Hz, 1 H), 4.33 - 4.25 (m, 3 H), 2.40 (s, 3 H), 1.27 (t,  $J$  = 7.1 Hz, 3 H).  $^{13}\text{C}$  NMR (126MHz,  $\text{CDCl}_3$ )  $\delta$  = 198.3, 193.4, 172.9, 165.4, 161.7 (d,  $J$  = 249.53 Hz), 152.9, 150.5, 148.9, 136.8, 129.8 (d,  $J$  = 3.24 Hz), 128.9 (d,  $J$  = 8.58 Hz), 127.2, 124.3 (d,  $J$  = 33.89 Hz), 124.0, 123.6 (d,  $J$  = 3.48 Hz), 121.8, 117.4, 115.6 (d,  $J$  = 23.51 Hz), 113.1, 93.8, 62.9, 38.8, 36.7, 22.6, 14.0. IR (v,  $\text{cm}^{-1}$ ): 3058, 2983, 2926, 1744, 1718, 1614, 1590, 1491, 1362, 1328, 1282, 1231, 1140, 1100, 1072, 1027, 991, 941, 898, 860, 757, 703, 665, 620; HRMS (ESI): Exact mass calcd for  $\text{C}_{26}\text{H}_{22}\text{O}_5\text{NF}$   $[\text{M}+\text{Na}]^+$ : 470.1374, Found 470.1368.  $[\alpha]_D^{26}$  = -18.267 ( $c$  2.25,  $\text{CHCl}_3$ ). The compound **4o** 98% ee was determined by chiral HPLC column (Chiralpak AD-H, hexane/i-PrOH = 90:10, flow rate = 0.5 mL/min,  $\lambda$  = 254 nm),  $t_R$  (major) = 57.67 min,  $t_R$  (minor) = 88.64 min.

**Ethyl (S)-2-((S)-1-(2-bromophenyl)-3-oxo-3-(pyridin-2-yl)propyl)-6-methyl-3-oxo-2,3-dihydrobenzofuran-2-carboxylate (4p)**

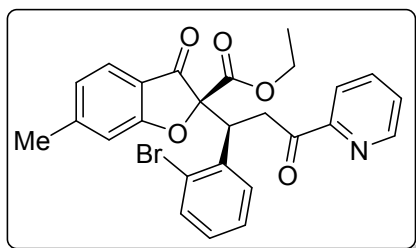

General experimental procedure **II** was followed to prepare the Michael Addition product **4p**. The desired product was obtained as foamy solid (106 mg, 92% yield).  $^1\text{H}$  NMR (500MHz,  $\text{CDCl}_3$ )  $\delta$  = 8.68 (qd,  $J$  = 0.8, 4.7 Hz, 1 H), 7.90 (d,  $J$  = 7.9 Hz, 1 H), 7.76 (dt,  $J$  = 1.7, 7.6 Hz, 1 H), 7.46 - 7.42 (m, 2 H), 7.36 (dd,  $J$  = 1.7, 7.7 Hz, 1 H), 7.27 (d,  $J$  = 1.6 Hz, 1 H), 7.05 (s, 1 H), 6.91 - 6.85 (m, 2 H), 6.78 (d,  $J$  = 7.9 Hz, 1 H), 5.34 - 5.28 (m, 1 H), 4.30 - 4.27 (m, 3 H), 3.81 (dd,  $J$  = 3.6, 17.8 Hz, 1 H), 2.45 (s, 1 H), 2.42 (s, 3 H), 1.31 - 1.26 (m, 3 H).  $^{13}\text{C}$  NMR (126MHz,  $\text{CDCl}_3$ )  $\delta$

= 193.4, 192.7, 172.9, 165.4, 153.0, 150.5, 148.9, 136.8, 136.8, 133.3, 129.1, 128.6, 127.2, 127.0, 126.8, 124.5, 124.1, 121.9, 117.7, 117.5, 113.1, 93.7, 62.9, 42.0, 40.0, 22.6, 14.0. IR ( $\nu$ ,  $\text{cm}^{-1}$ ): 3057, 2981, 2926, 1744, 1720, 1615, 1466, 1361, 1328, 1280, 1232, 1140, 1076, 1024, 992, 860, 820, 758, 736, 672, 653; HRMS (ESI): Exact mass calcd for  $\text{C}_{26}\text{H}_{22}\text{O}_5\text{NBr}$   $[\text{M}+\text{Na}]^+$ : 530.0574, Found 530.0571.  $[\alpha]_{\text{D}}^{28.3} = +39.891$  ( $c$  2.75,  $\text{CHCl}_3$ ). The compound **4p** 92% ee was determined by chiral HPLC column (Phenomenex Amylose-2, hexane/*i*-PrOH = 80:20, flow rate = 1.0 mL/min,  $\lambda$  = 254 nm),  $t_{\text{R}}$  (major) = 24.85 min,  $t_{\text{R}}$  (minor) = 29.39 min.

**Ethyl (S)-2-((S)-1-(3-fluorophenyl)-3-oxo-3-(pyridin-2-yl)propyl)-6-methyl-3-oxo-2,3-dihydrobenzofuran-2-carboxylate(4q)**

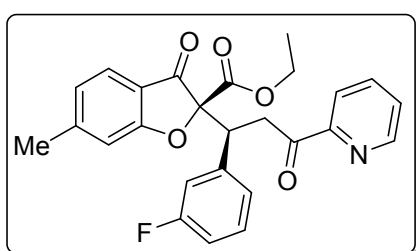

General experimental procedure **II** was followed to prepare the Michael Addition product **4q**. The desired product was obtained as foamy solid (93 mg, 92% yield).  $^1\text{H}$  NMR (500MHz,  $\text{CDCl}_3$ )  $\delta$  = 8.70 - 8.69 (m, 1 H), 7.89 (td,  $J$  = 1.2, 7.7 Hz, 1 H), 7.77 (dt,  $J$  = 1.9, 7.7 Hz, 1 H), 7.46 (ddd,  $J$  = 1.3, 4.7, 7.6 Hz, 1 H), 7.26 - 7.24 (m, 1 H), 7.09 (d,  $J$  = 7.6 Hz, 1 H), 7.02 - 6.99 (m, 3 H), 6.75 (d,  $J$  = 7.9 Hz, 1 H), 6.69 - 6.63 (m, 1 H), 4.68 (dd,  $J$  = 3.3, 10.9 Hz, 1 H), 4.37 (dd,  $J$  = 10.9, 17.8 Hz, 1 H), 4.26 (q,  $J$  = 6.9 Hz, 2 H), 3.55 (dd,  $J$  = 3.3, 17.8 Hz, 1 H), 2.39 (s, 3 H), 1.26 (t,  $J$  = 7.1 Hz, 3 H).  $^{13}\text{C}$  NMR (126MHz,  $\text{CDCl}_3$ )  $\delta$  = 198.3, 193.7, 173.0, 165.4, 163.2 (d,  $J$  = 245.74 Hz), 152.9, 150.8, 149.0, 139.0 (d,  $J$  = 7.27 Hz), 136.9, 129.4 (d,  $J$  = 8.23 Hz), 127.3, 125.6 (d,  $J$  = 3.28 Hz), 124.6, 124.3, 124.1, 121.8, 117.5, 116.3 (d,  $J$  = 21.97 Hz), 114.3 (d,  $J$  = 21.03 Hz), 113.1, 94.0, 62.9, 44.2, 38.9, 22.6, 14.0. IR ( $\nu$ ,  $\text{cm}^{-1}$ ): 3059, 2983, 1744, 1715, 1614, 1487, 1445, 1360, 1328, 1279, 1229, 1142, 1115, 1088, 1027, 992, 892, 862, 775, 736, 693, 637; HRMS (ESI): Exact mass calcd for  $\text{C}_{26}\text{H}_{22}\text{O}_5\text{NF}$   $[\text{M}+\text{Na}]^+$ : 470.1374, Found 470.1369.  $[\alpha]_{\text{D}}^{26} = +12.667$  ( $c$  2.25,  $\text{CHCl}_3$ ). The compound **4q** 80% ee was determined by chiral HPLC column (Chiralpak AD-H, hexane/*i*-PrOH = 90:10, flow rate = 1.0 mL/min,  $\lambda$  = 254 nm),  $t_{\text{R}}$  (major) = 22.86 min,  $t_{\text{R}}$  (minor) = 30.11 min.

**Ethyl (S)-2-((S)-1-(4-fluorophenyl)-3-oxo-3-(pyridin-2-yl)propyl)-6-methyl-3-oxo-2,3-dihydrobenzofuran-2-carboxylate (4r)**

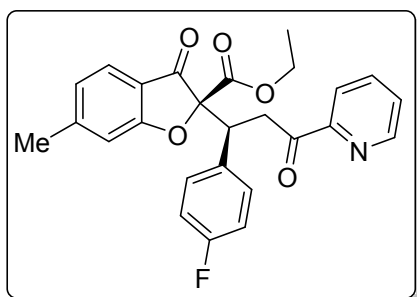

General experimental procedure **II** was followed to prepare the Michael Addition product **4r**. The desired product was

obtained as yellow foamy solid (97 mg, 96% yield).  $^1\text{H}$  NMR (500MHz,  $\text{CDCl}_3$ )  $\delta$  = 8.70 - 8.69 (m, 1 H), 7.88 (td,  $J$  = 0.9, 7.9 Hz, 1 H), 7.76 (dt,  $J$  = 1.6, 7.7 Hz, 1 H), 7.45 (ddd,  $J$  = 1.3, 4.7, 7.6 Hz, 1 H), 7.27 - 7.23 (m, 3 H), 7.00 (s, 1 H), 6.76 - 6.67 (m, 3 H), 4.69 (dd,  $J$  = 3.2, 11.0 Hz, 1 H), 4.37 (dd,  $J$  = 11.0, 17.7 Hz, 1 H), 4.27 (q,  $J$  = 7.3 Hz, 2 H), 3.53 (dd,  $J$  = 3.5, 17.7 Hz, 1 H), 2.39 (s, 3 H), 1.27 (t,  $J$  = 7.1 Hz, 3 H).  $^{13}\text{C}$  NMR (126MHz,  $\text{CDCl}_3$ )  $\delta$  = 198.5, 193.8, 173.0, 165.5, 162.8 (d,  $J$  = 246.96 Hz), 153.0, 150.7, 148.9, 136.9, 136.8, 132.1 (d,  $J$  = 4.15 Hz), 131.1 (d,  $J$  = 10.08 Hz), 127.3, 124.5, 124.2 (d,  $J$  = 13.37 Hz), 121.8, 117.5, 114.9, 114.7, 113.0, 94.2, 62.8, 43.9, 38.9, 22.6, 14.0. IR (v,  $\text{cm}^{-1}$ ): 3056, 2982, 2927, 1744, 1716, 1614, 1509, 1435, 1360, 1328, 1281, 1224, 1160, 1140, 1097, 1027, 993, 856, 825, 774, 750, 656, 619; HRMS (ESI):  $\text{C}_{26}\text{H}_{22}\text{O}_5\text{NF}$   $[\text{M}+\text{Na}]^+$ : 470.1374, Found 470.1370.  $[\alpha]_{\text{D}}^{29.3}$  = -6.20 ( $c$  2.5,  $\text{CHCl}_3$ ). The compound **4r** 88% ee was determined by chiral HPLC column (Chiralpak AD-H, hexane/*i*-PrOH = 90:10, flow rate = 0.5 mL/min,  $\lambda$  = 254 nm),  $t_{\text{R}}$  (major) = 51.91 min,  $t_{\text{R}}$  (minor) = 93.77 min.

**Ethyl (S)-6-methyl-2-((S)-1-(4-nitrophenyl)-3-oxo-3-(pyridin-2-yl)propyl)-3-oxo-2,3-dihydrobenzofuran-2-carboxylate (4s)**

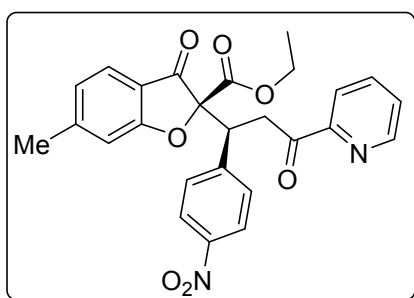

General experimental procedure **II** was followed to prepare the Michael Addition product **4s**. The desired product was obtained as yellow foamy solid (102 mg, 95% yield).  $^1\text{H}$  NMR (500MHz,  $\text{CDCl}_3$ )  $\delta$  = 8.71 - 8.70 (m, 1 H), 7.91 - 7.87 (m, 3 H), 7.79 - 7.75 (m, 1 H), 7.50 - 7.45 (m, 3 H), 7.24 (d,  $J$  = 7.9 Hz, 1 H), 7.02 (s, 1 H), 6.78 (d,  $J$  = 7.9 Hz, 1 H), 4.79 (dd,  $J$  = 3.2, 11.0 Hz, 1 H), 4.45 (dd,  $J$  = 11.2, 18.1 Hz, 1 H), 4.28 (q,  $J$  = 7.1 Hz, 2 H), 3.61 (dd,  $J$  = 3.2, 18.3 Hz, 1 H), 2.41 (s, 3 H), 1.27 (t,  $J$  = 7.1 Hz, 3 H).  $^{13}\text{C}$  NMR (126MHz,  $\text{CDCl}_3$ )  $\delta$  = 198.1, 193.4, 172.9, 165.1, 152.7, 151.2, 149.0, 147.0, 144.4, 137.0, 130.5, 127.5, 124.5, 124.4, 123.1, 121.8, 117.3, 113.1, 93.6, 63.1, 44.1, 38.8, 22.7, 14.0. IR (v,  $\text{cm}^{-1}$ ): 3058, 2983, 2927, 2858, 1745, 1715, 1615, 1520, 1437, 1347, 1282, 1233, 1140, 1114, 1074, 1028, 993, 942, 858, 821, 775, 755, 736, 696, 617; HRMS (ESI): Exact mass calcd for  $\text{C}_{26}\text{H}_{22}\text{O}_7\text{N}_2$   $[\text{M}+\text{Na}]^+$ : 497.1319, Found 497.1316.  $[\alpha]_{\text{D}}^{29.3}$  = -0.160 ( $c$  2.5,  $\text{CHCl}_3$ ). The compound **4s** 94% ee was determined by chiral HPLC column (Chiralpak AD-H, hexane/*i*-PrOH = 90:10, flow rate = 1.0 mL/min,  $\lambda$  = 254 nm),  $t_{\text{R}}$  (major) = 66.83 min,  $t_{\text{R}}$  (minor) = 87.59 min.

**Ethyl (S)-2-((S)-1-(furan-2-yl)-3-oxo-3-(pyridin-2-yl)propyl)-6-methyl-3-oxo-2,3-dihydrobenzofuran-2-carboxylate (4t)**

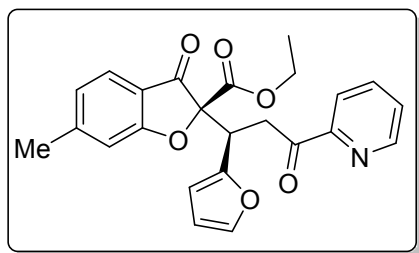

General experimental procedure **II** was followed to prepare the Michael Addition product **4t**. The desired product was obtained as foamy solid (72 mg, 76% yield).

$^1\text{H}$  NMR (500MHz,  $\text{CDCl}_3$ )  $\delta$  = 8.71 - 8.70 (m, 1 H), 7.96 (td,  $J$  = 1.1, 7.9 Hz, 1 H), 7.80 (dt,  $J$  = 1.6, 7.7 Hz, 1 H), 7.47 (ddd,  $J$  = 1.1, 5.0, 7.5 Hz, 1 H), 7.37 (d,  $J$  = 7.9 Hz, 1 H), 7.02 – 6.70 (m, 2 H), 6.82 (d,  $J$  = 7.9 Hz, 1 H), 6.08 (d,  $J$  = 3.2 Hz, 1 H), 6.00 (dd,  $J$  = 1.9, 3.2 Hz, 1 H), 4.81 (dd,  $J$  = 3.3, 10.9 Hz, 1 H), 4.33 (dd,  $J$  = 10.7, 18.0 Hz, 1 H), 4.26 (q,  $J$  = 7.3 Hz, 2 H), 3.53 (dd,  $J$  = 3.2, 18.0 Hz, 1 H), 2.41 (s, 3 H), 1.26 (t,  $J$  = 7.1 Hz, 4 H).  $^{13}\text{C}$  NMR (126MHz,  $\text{CDCl}_3$ )  $\delta$  = 198.2, 193.8, 173.1, 165.2, 152.9, 150.5, 149.0, 141.7, 136.8, 127.3, 124.3, 124.0, 121.9, 117.1, 113.3, 110.0, 108.6, 93.1, 62.8, 38.8, 37.3, 22.6, 14.0. IR (v,  $\text{cm}^{-1}$ ): 3056, 2982, 2926, 1745, 1718, 1615, 1595, 1501, 1437, 1357, 1281, 1236, 1170, 1139, 1079, 1028, 994, 941, 912, 884, 860, 816, 774, 753, 698, 650; HRMS (ESI): Exact mass calcd for  $\text{C}_{24}\text{H}_{21}\text{NO}_6$   $[\text{M}+\text{Na}]^+$ : 442.1261, Found 442.1256.  $[\alpha]_{\text{D}}^{29.3}$  = -21.086 ( $c$  1.75,  $\text{CHCl}_3$ ). The compound **3t** 88% ee was determined by chiral HPLC column (Chiralpak IG, hexane/*i*-PrOH = 80:20, flow rate = 1.0 mL/min,  $\lambda$  = 254 nm),  $t_{\text{R}}$  (major) = 30.72 min,  $t_{\text{R}}$  (minor) = 39.96 min.

**Methyl (S)-3-oxo-2-((S)-3-oxo-1,3-diphenylpropyl)-2,3-dihydrobenzofuran-2-carboxylate (6)**

General experimental procedure **II** was followed to prepare the Michael Addition product **6**.

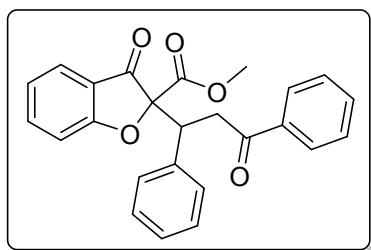

$^1\text{H}$  NMR (400MHz,  $\text{CDCl}_3$ )  $\delta$  = 7.92 (d,  $J$  = 7.2 Hz, 2 H), 7.69 (d,  $J$  = 7.8 Hz, 1 H), 7.73 (d,  $J$  = 7.1 Hz, 1 H), 7.59 - 7.50 (m, 2 H), 7.50 - 7.39 (m, 4 H), 7.39 - 7.29 (m, 2 H), 7.29 - 7.12 (m, 5 H), 7.07 - 6.96 (m, 3 H), 6.92 (t,  $J$  = 7.5 Hz, 1 H), 4.70 - 4.56 (m, 1 H), 3.94 (dd,  $J$  = 10.3, 16.9 Hz, 1 H), 3.81 (s, 3 H), 3.54 (s, 2 H), 3.49 (d,  $J$  = 13.8 Hz, 1 H), 3.06 - 2.96 (m, 1 H).  $^{13}\text{C}$  NMR (100MHz,  $\text{CDCl}_3$ )  $\delta$  = 196.6, 196.4, 194.7, 194.2, 172.5, 172.2, 166.0, 165.0, 139.0, 138.4, 137.7, 136.6, 136.6, 135.8, 133.2, 133.1, 129.3, 129.2, 128.6, 128.5, 128.3, 128.1, 128.1, 128.0, 127.6, 127.5, 125.0, 124.7, 123.0, 122.5, 120.1, 119.8, 113.7, 113.0, 94.4, 93.7, 53.7, 53.2, 45.9, 45.0, 39.7, 38.6. HRMS (ESI): Exact mass calcd for  $\text{C}_{25}\text{H}_{20}\text{NO}_5$   $[\text{M}+\text{Na}]^+$ : 423.1203, Found 423.1195.

(Catalyst-**3k**)

The desired product **6** was obtained as liquid (21mg, 20% yield). (*dr* 20:80) Major diastereomer 12% ee was determined by chiral HPLC column (Phenomenex Amylose-2, hexane/i-PrOH = 80:20, flow rate = 1.0 mL/min,  $\lambda$  = 254 nm), *t*R (major) = 28.44 min, *t*R (minor) = 44.47 min. Minor diastereomer 30% ee was determined by chiral HPLC column (Phenomenex Amylose-2, hexane/i-PrOH = 80:20, flow rate = 1.0 mL/min,  $\lambda$  = 254 nm), *t*R (major) = 35.22 min, *t*R (minor) = 66.65 min.

(Catalyst-**3l**)

The desired product **ent-6** was obtained as liquid (37mg, 36% yield). (*dr* 43:57) Major diastereomer 20% ee was determined by chiral HPLC column (Phenomenex Amylose-2, hexane/i-PrOH = 80:20, flow rate = 1.0 mL/min,  $\lambda$  = 254 nm), *t*R (major) = 43.25 min, *t*R (minor) = 27.88 min. Minor diastereomer 20% ee was determined by chiral HPLC column (Phenomenex Amylose-2, hexane/i-PrOH = 80:20, flow rate = 1.0 mL/min,  $\lambda$  = 254 nm), *t*R (major) = 62.40 min, *t*R (minor) = 34.30 min.

**Methyl (S)-3-oxo-2-((S)-3-oxo-1-phenyl-3-(pyridin-3-yl)propyl)-2,3-dihydrobenzofuran-2-carboxylate (8)**

General experimental procedure **II** was followed to prepare the Michael Addition product **8**.

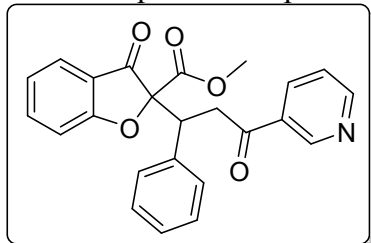

<sup>1</sup>H NMR (400MHz, CDCl<sub>3</sub>)  $\delta$  = 9.18 (br. s., 1 H), 8.95 (br. s., 1 H), 8.79 (br. s., 1 H), 8.72 (br. s., 1 H), 8.24 (d, *J* = 7.7 Hz, 1 H), 8.08 (d, *J* = 7.8 Hz, 1 H), 7.93 (d, *J* = 7.6 Hz, 1 H), 7.79 - 7.63 (m, 2 H), 7.57 (t, *J* = 7.6 Hz, 1 H), 7.52 - 7.42 (m, 3 H), 7.37 (d, *J* = 7.6 Hz, 3 H), 7.32 - 7.09 (m, 6 H), 7.09 - 6.80 (m, 4 H), 4.62 (d, *J* = 10.0 Hz, 1 H), 3.94 (dd, *J* = 10.3, 17.0 Hz, 1 H), 3.82 (s, 2 H), 3.58 (d, *J* = 3.5 Hz, 1 H), 3.55 (s, 3 H), 3.02 (d, *J* = 16.6 Hz, 1 H). <sup>13</sup>C NMR (100MHz, CDCl<sub>3</sub>)  $\delta$  = 195.4, 195.1, 194.7, 194.1, 172.5, 172.3, 166.0, 164.9, 162.1, 152.7, 152.6, 148.8, 148.7, 139.2, 138.5, 137.4, 136.3, 136.1, 135.5, 135.5, 132.2, 130.6, 129.3, 129.2, 129.1, 128.5, 128.2, 127.9, 127.7, 125.0, 124.8, 124.1, 124.0, 123.2, 122.7, 120.0, 119.8, 119.0, 117.4, 113.7, 113.0, 94.1, 93.4, 53.7, 53.3, 45.6, 44.7, 40.1, 38.9. HRMS (ESI): Exact mass calcd for C<sub>24</sub>H<sub>19</sub>NO<sub>5</sub> [M+Na]<sup>+</sup>: 424.1155, Found 424.1150

(Catalyst **3k**)

The desired product **8** was obtained as liquid (55 mg, 53% yield) (*dr* 27:73) Major diastereomer 36% ee was determined by chiral HPLC column (AS-H, hexane/i-PrOH = 80:20, flow rate =

0.5 mL/min,  $\lambda$  = 254 nm),  $t_R$  (major) = 34.62 min,  $t_R$  (minor) = 32.62 min. Minor diastereomer 26% ee was determined by chiral HPLC column (AS-H, hexane/i-PrOH = 80:20, flow rate = 0.5 mL/min,  $\lambda$  = 254 nm),  $t_R$  (major) = 27.22 min,  $t_R$  (minor) = 42.20 min.

(Catalyst **3I**)

The desired product **ent-8** was obtained as liquid (75mg, 72% yield) (*dr* 64:36) Major diastereomer 17% ee was determined by chiral HPLC column (AS-H, hexane/i-PrOH = 80:20, flow rate = 0.5 mL/min,  $\lambda$  = 254 nm),  $t_R$  (major) = 31.64 min,  $t_R$  (minor) = 33.64 min. Minor diastereomer 26% ee was determined by chiral HPLC column (AS-H, hexane/i-PrOH = 80:20, flow rate = 0.5 mL/min,  $\lambda$  = 254 nm),  $t_R$  (major) = 40.76 min,  $t_R$  (minor) = 26.55 min.

#### 4. Reference

1. L. Zhao, G. Huang, B. Guo, L. Xu, J. Chen, W. Cao, G. Zhao, X. Wu, *Org. Lett.* **2014**, *16*, 5584-5587.
2. a) Vakulya, B.; Varga, S.; Csampai, A.; Soos, T., *Org. Lett.* **2005**, *7*, 1967-1969; b) Malerich, J. P.; Hagihara, K.; Rawal, V. H., *J. Am. Chem. Soc.* **2008**, *130*, 14416-14417; c) Konishi, H.; Lam, T. Y.; Malerich, J. P.; Rawal, V. H., *Org. Lett.* **2010**, *12*, 2028-203; d) Lee, J. W.; Ryu, T. H.; Oh, J. S.; Bae, H. Y.; Jang, H. B.; Song, C. E. *Chem. Commun.* **2009**, 7224.
3. a) Singh, P. K.; Singh, V. K. *Org. Lett.* **2008**, *10*, 4121; b) Molleti, N.; Rana, N. K.; Singh, V. K. *Org. Lett.* **2012**, *14*, 4322.

#### 5. Crystal data and structure refinement for **4i(Major)** and **CCDC:1935062**

|                      |                                                     |                 |
|----------------------|-----------------------------------------------------|-----------------|
| Identification code  | N-5-Cl                                              |                 |
| Empirical formula    | C <sub>24</sub> H <sub>18</sub> Cl N O <sub>5</sub> |                 |
| Formula weight       | 435.84                                              |                 |
| Temperature          | 296(2) K                                            |                 |
| Wavelength           | 1.54184 Å                                           |                 |
| Crystal system       | Orthorhombic                                        |                 |
| Space group          | P2 <sub>1</sub> 2 <sub>1</sub> 2 <sub>1</sub>       |                 |
| Unit cell dimensions | a = 10.857(3) Å                                     | $\alpha$ = 90°. |
|                      | b = 11.281(4) Å                                     | $\beta$ = 90°.  |
|                      | c = 17.580(4) Å                                     | $\gamma$ = 90°. |

|                                   |                                                               |
|-----------------------------------|---------------------------------------------------------------|
| Volume                            | 2153.1(10) Å <sup>3</sup>                                     |
| Z                                 | 4                                                             |
| Density (calculated)              | 1.345 Mg/m <sup>3</sup>                                       |
| Absorption coefficient            | 1.877 mm <sup>-1</sup>                                        |
| F(000)                            | 904                                                           |
| Crystal size                      | 0.150 x 0.150 x 0.100 mm <sup>3</sup>                         |
| Theta range for data collection   | 4.657 to 72.161°.                                             |
| Index ranges                      | -13<= <i>h</i> <=13, -12<= <i>k</i> <=13, -21<= <i>l</i> <=21 |
| Reflections collected             | 28698                                                         |
| Independent reflections           | 4232 [R(int) = 0.0704]                                        |
| Completeness to theta = 67.684°   | 99.7 %                                                        |
| Absorption correction             | Semi-empirical from equivalents                               |
| Max. and min. transmission        | 0.7436 and 0.5452                                             |
| Refinement method                 | Full-matrix least-squares on F <sup>2</sup>                   |
| Data / restraints / parameters    | 4232 / 0 / 281                                                |
| Goodness-of-fit on F <sup>2</sup> | 1.082                                                         |
| Final R indices [I>2sigma(I)]     | R1 = 0.0477, wR2 = 0.1149                                     |
| R indices (all data)              | R1 = 0.0563, wR2 = 0.1218                                     |
| Absolute structure parameter      | 0.084(10)                                                     |
| Extinction coefficient            | 0.0162(14)                                                    |
| Largest diff. peak and hole       | 0.176 and -0.194 e.Å <sup>-3</sup>                            |

## 6. ORTEP Diagram for compound **4i (Major)** and **CCDC:1935062**

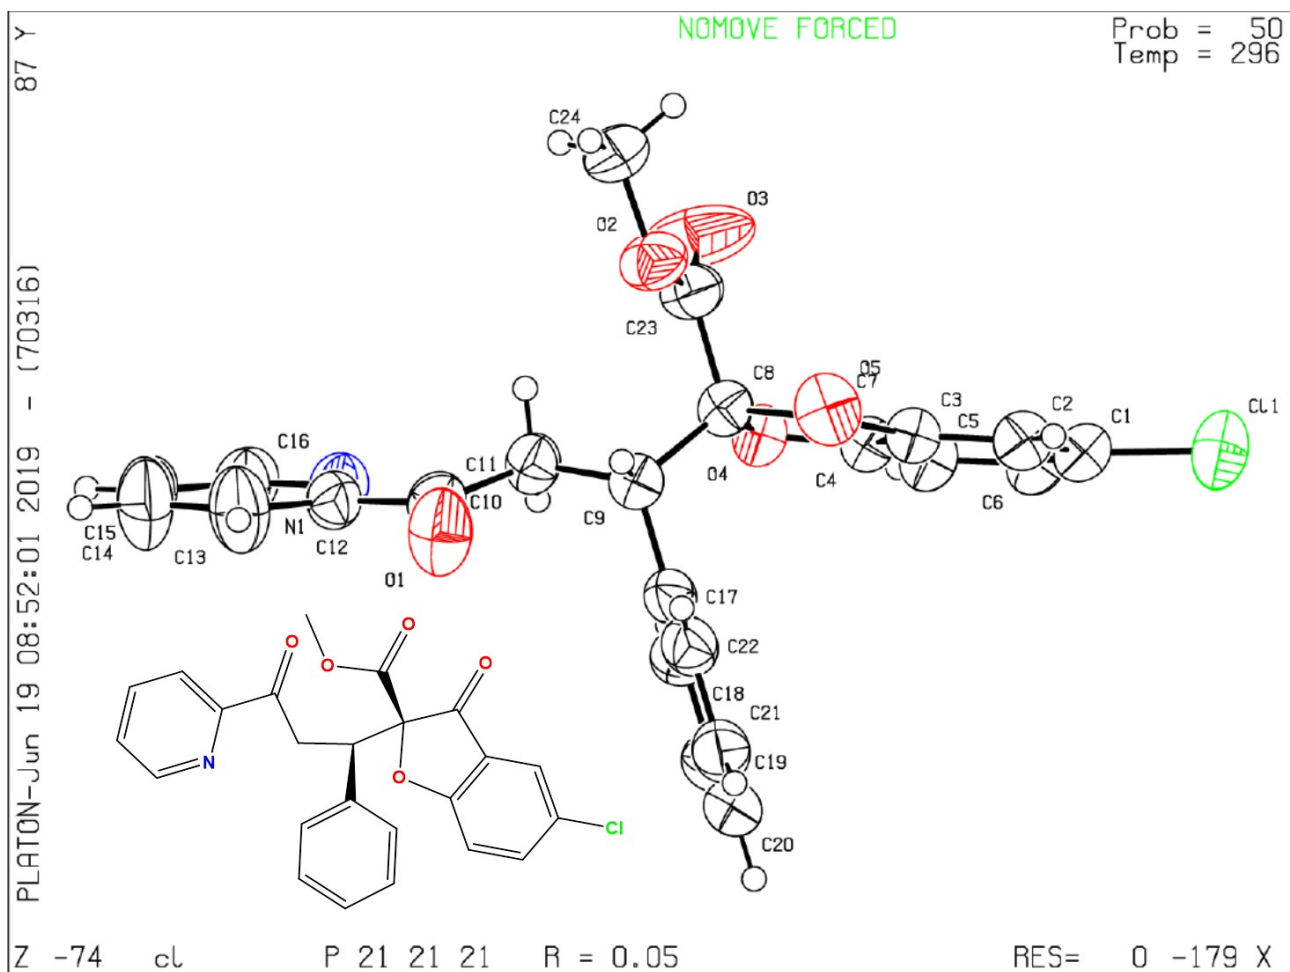

## 7. $^1\text{H}$ and $^{13}\text{C}$ NMR spectrum of compound 4a

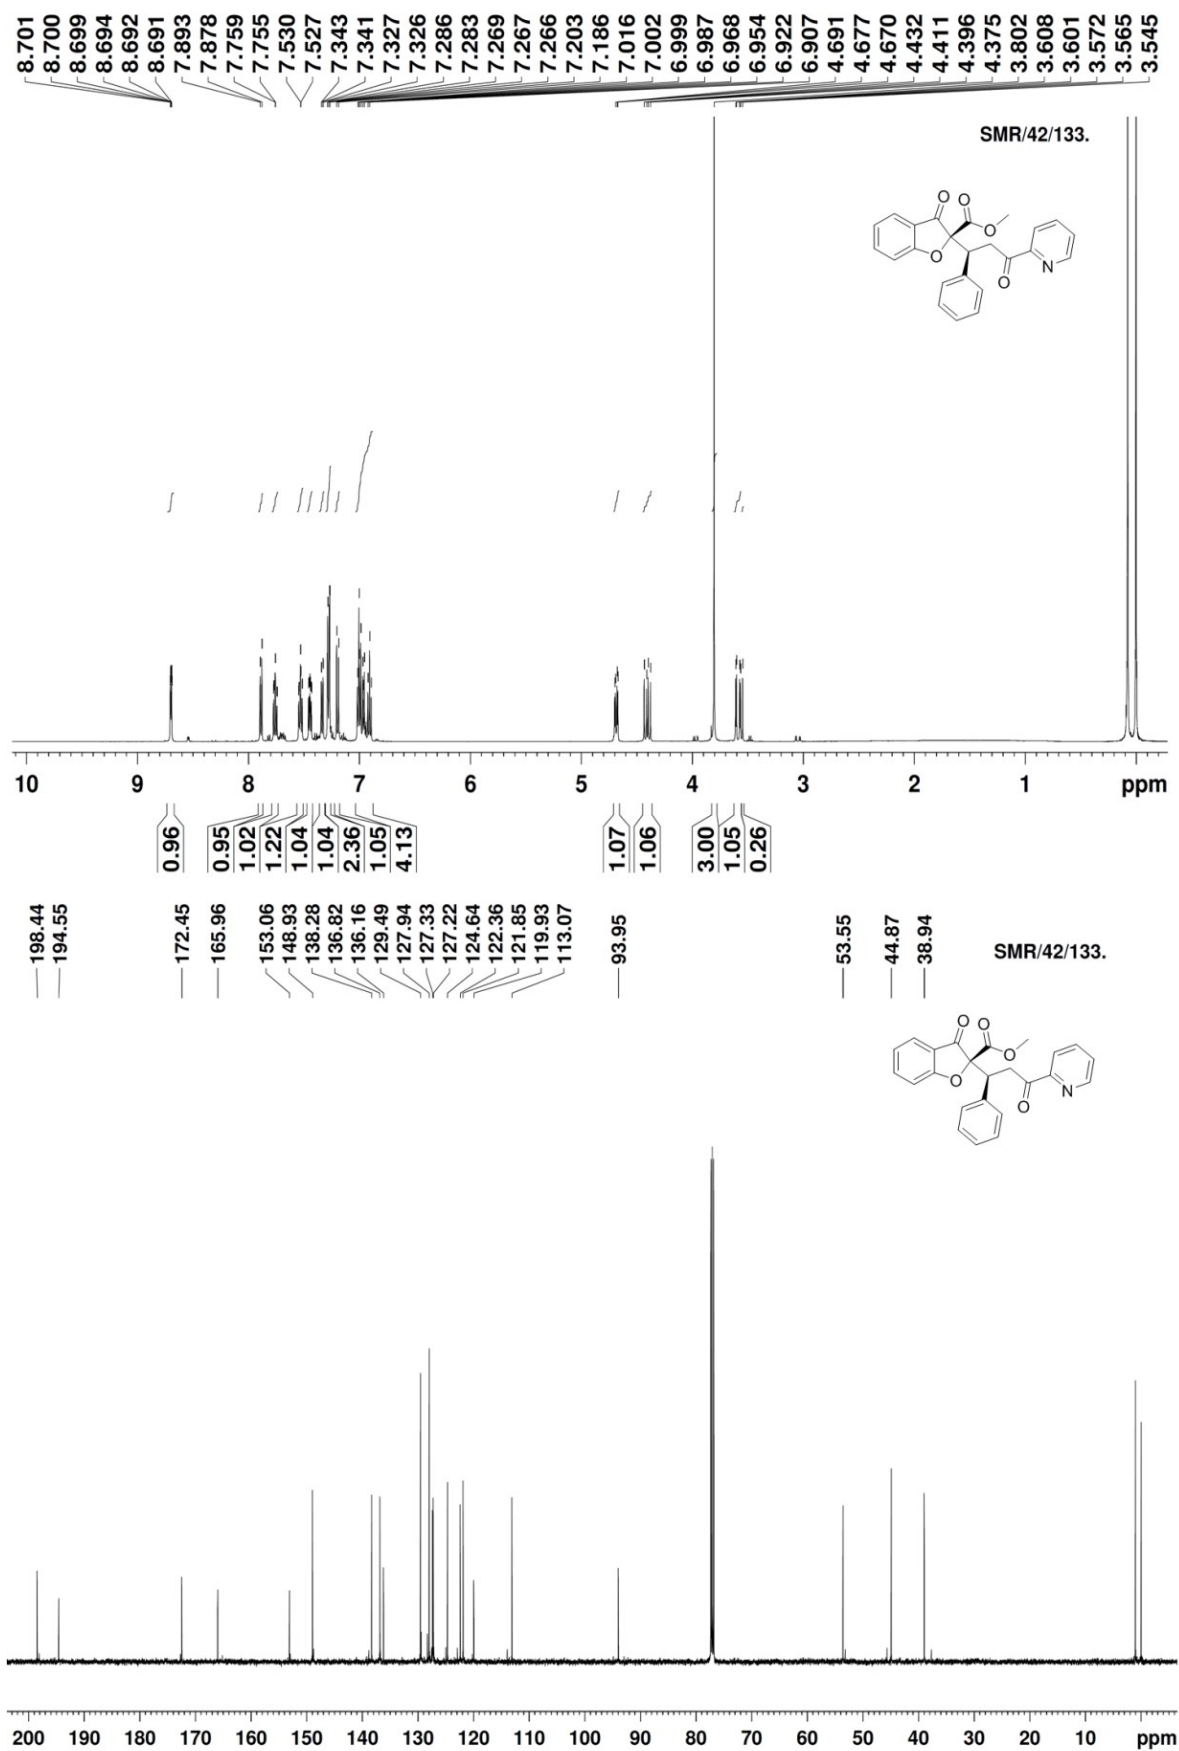

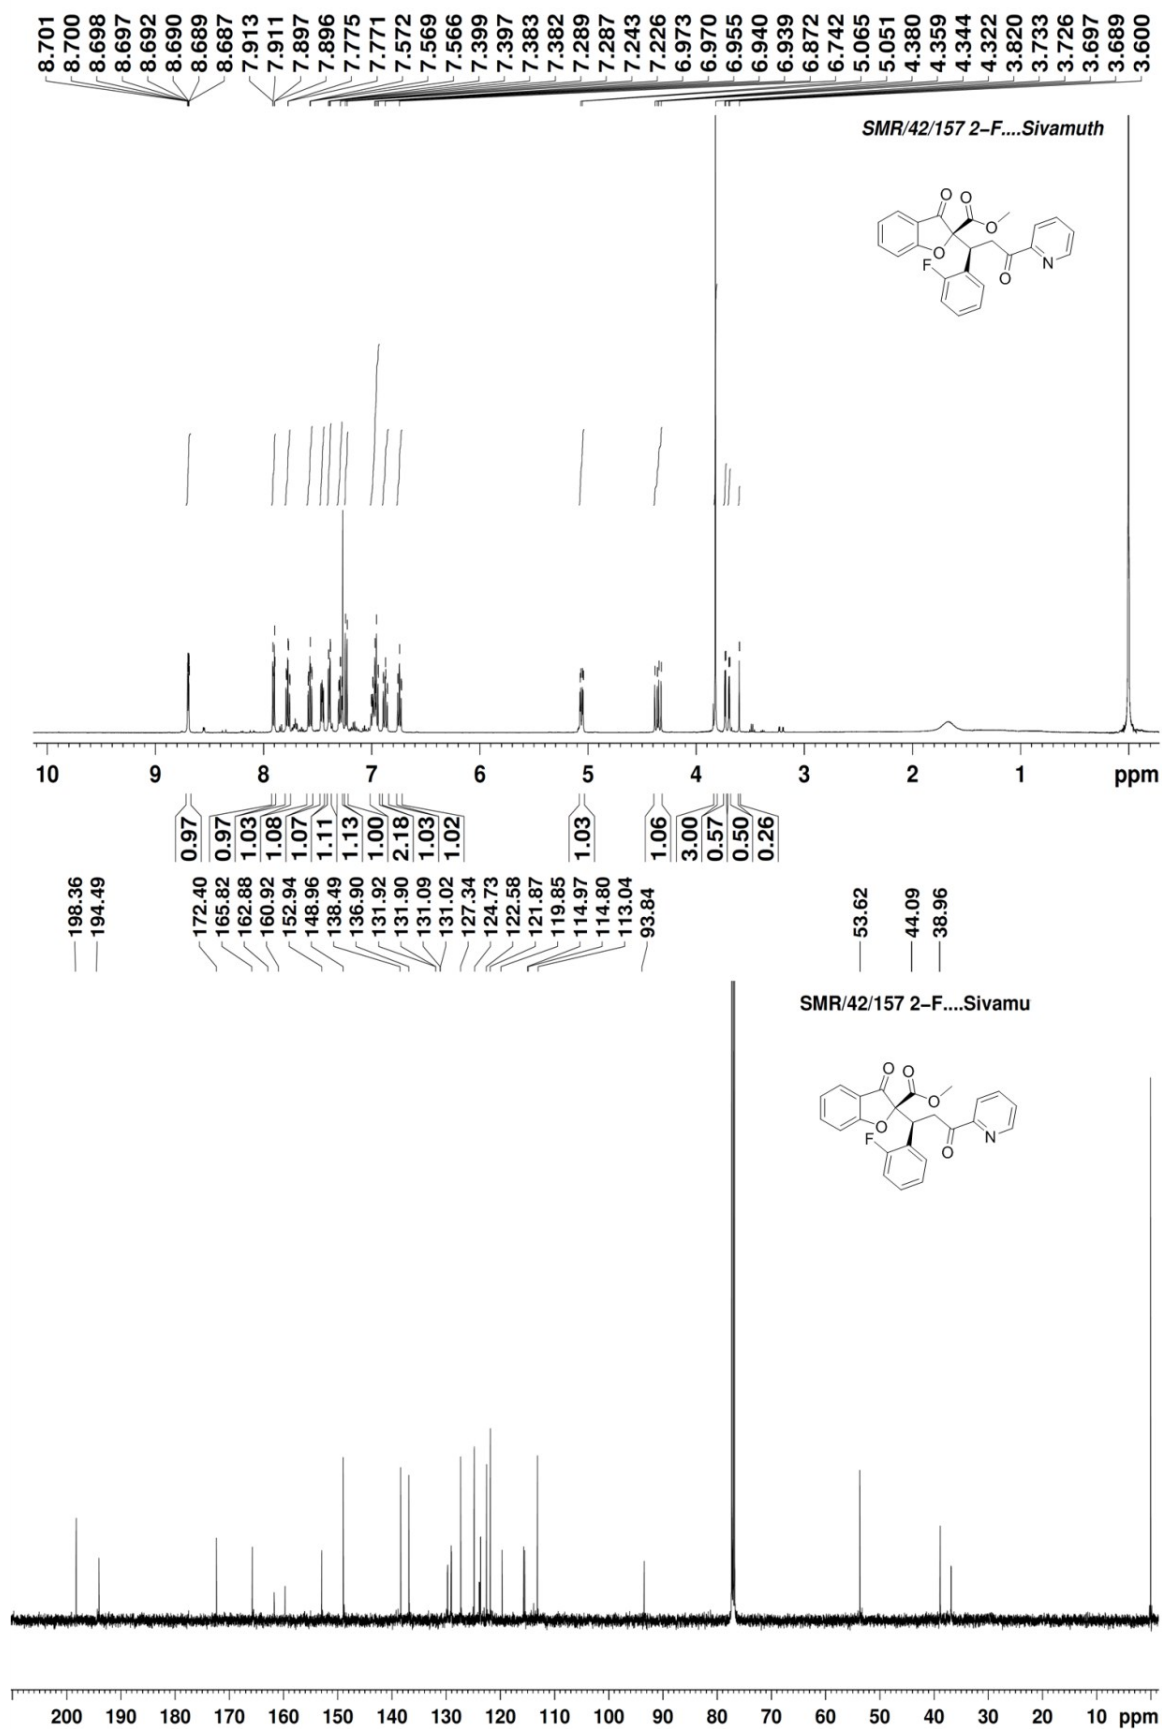

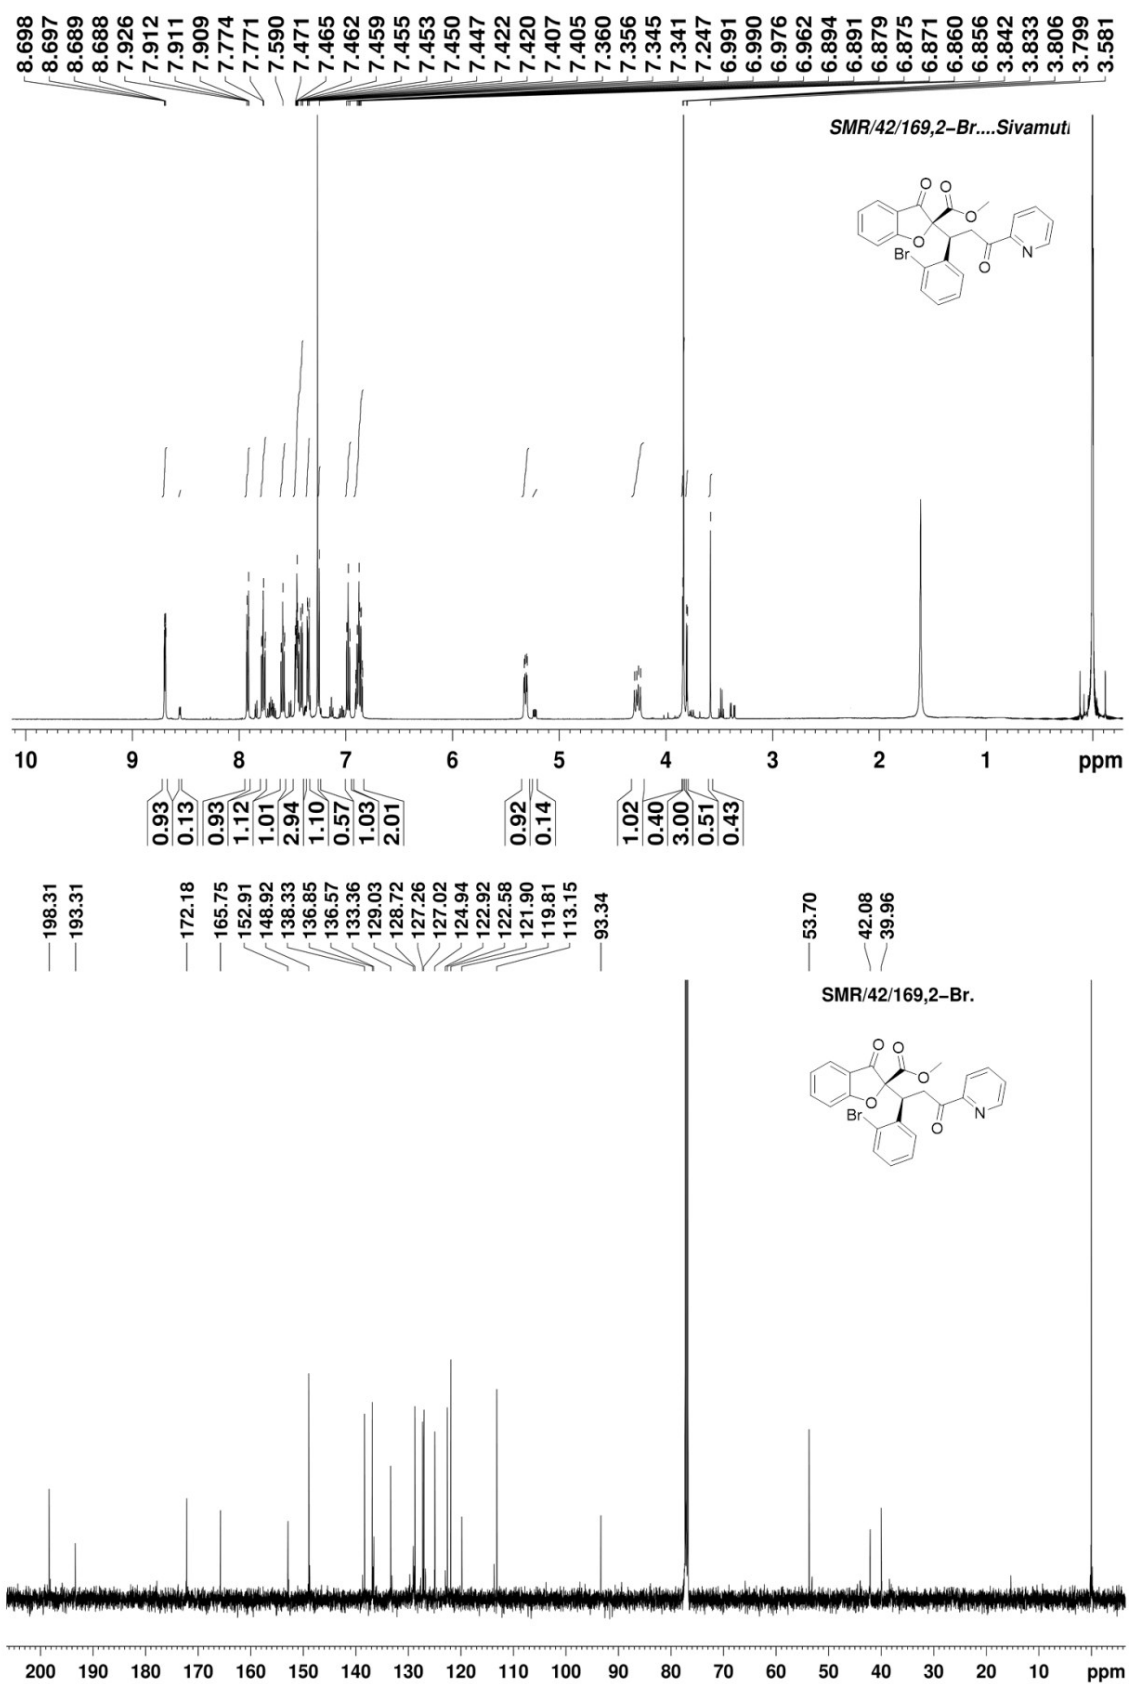

**<sup>1</sup>H and <sup>13</sup>C NMR spectrum of compound 4d**

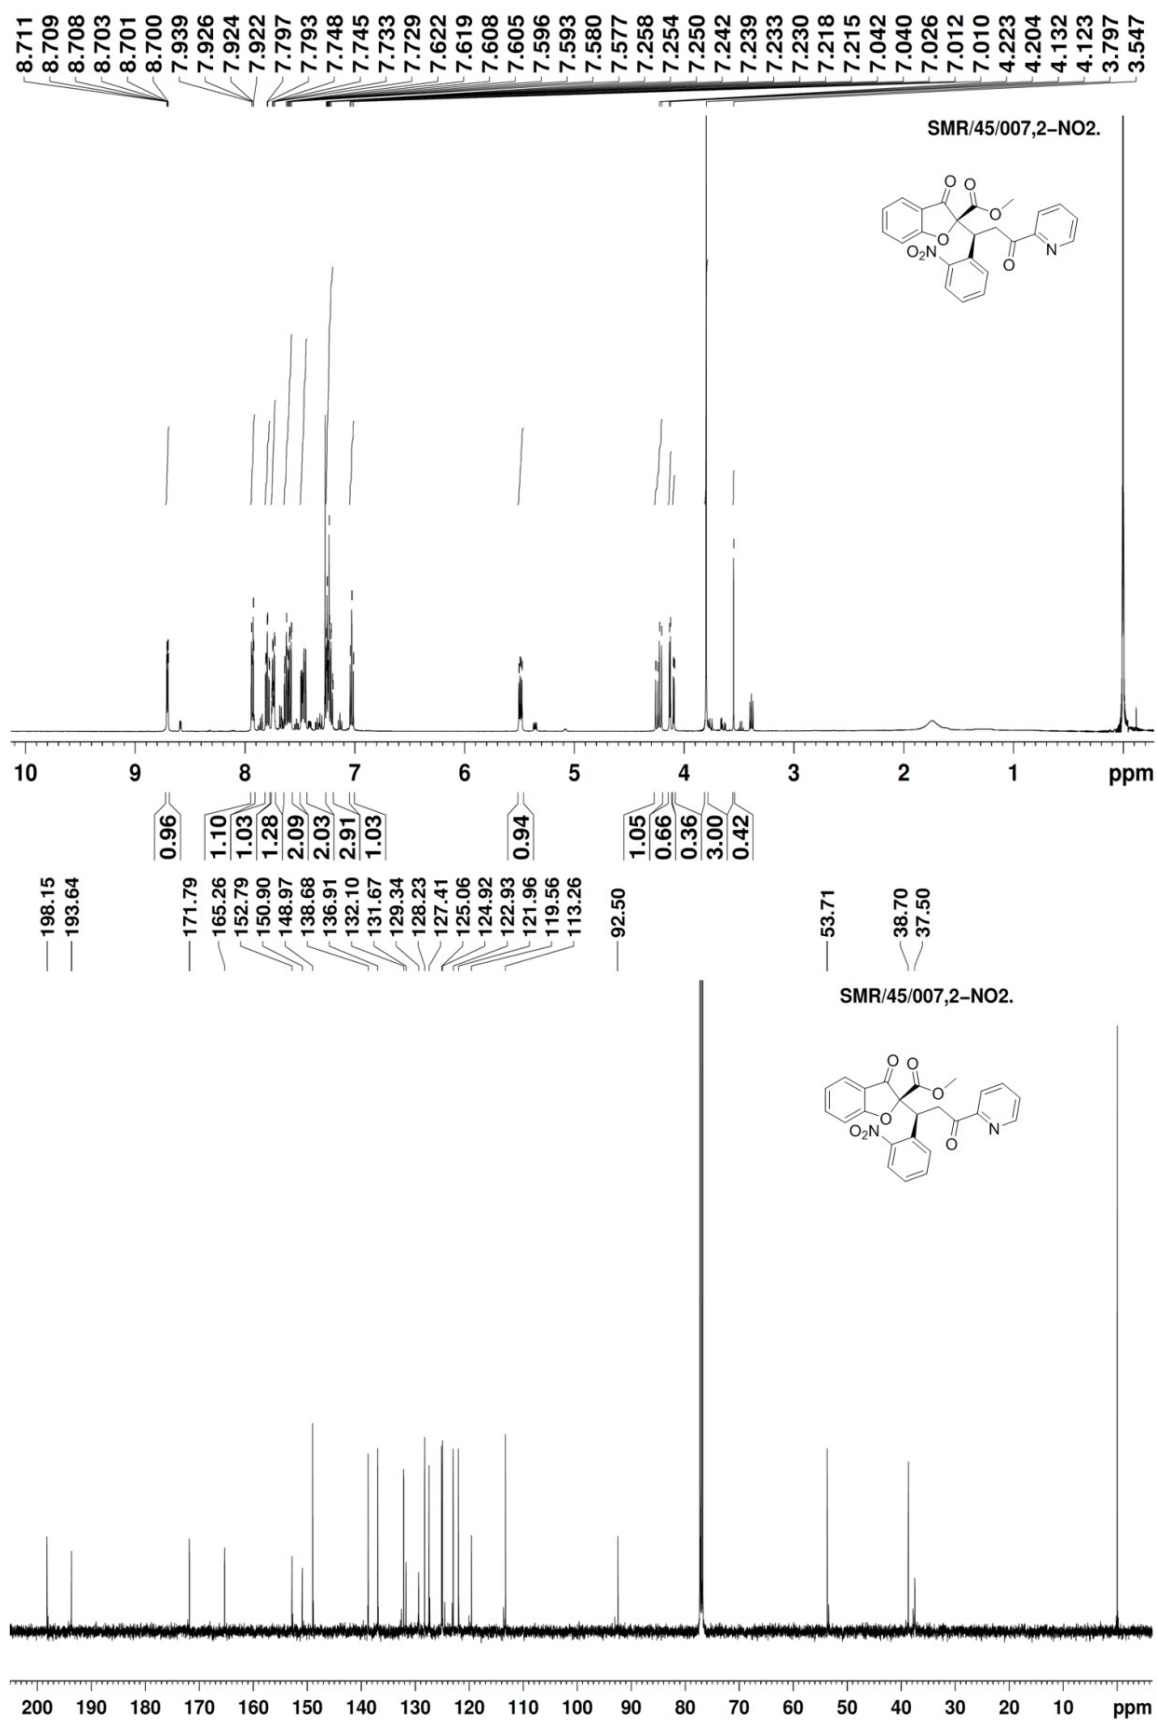

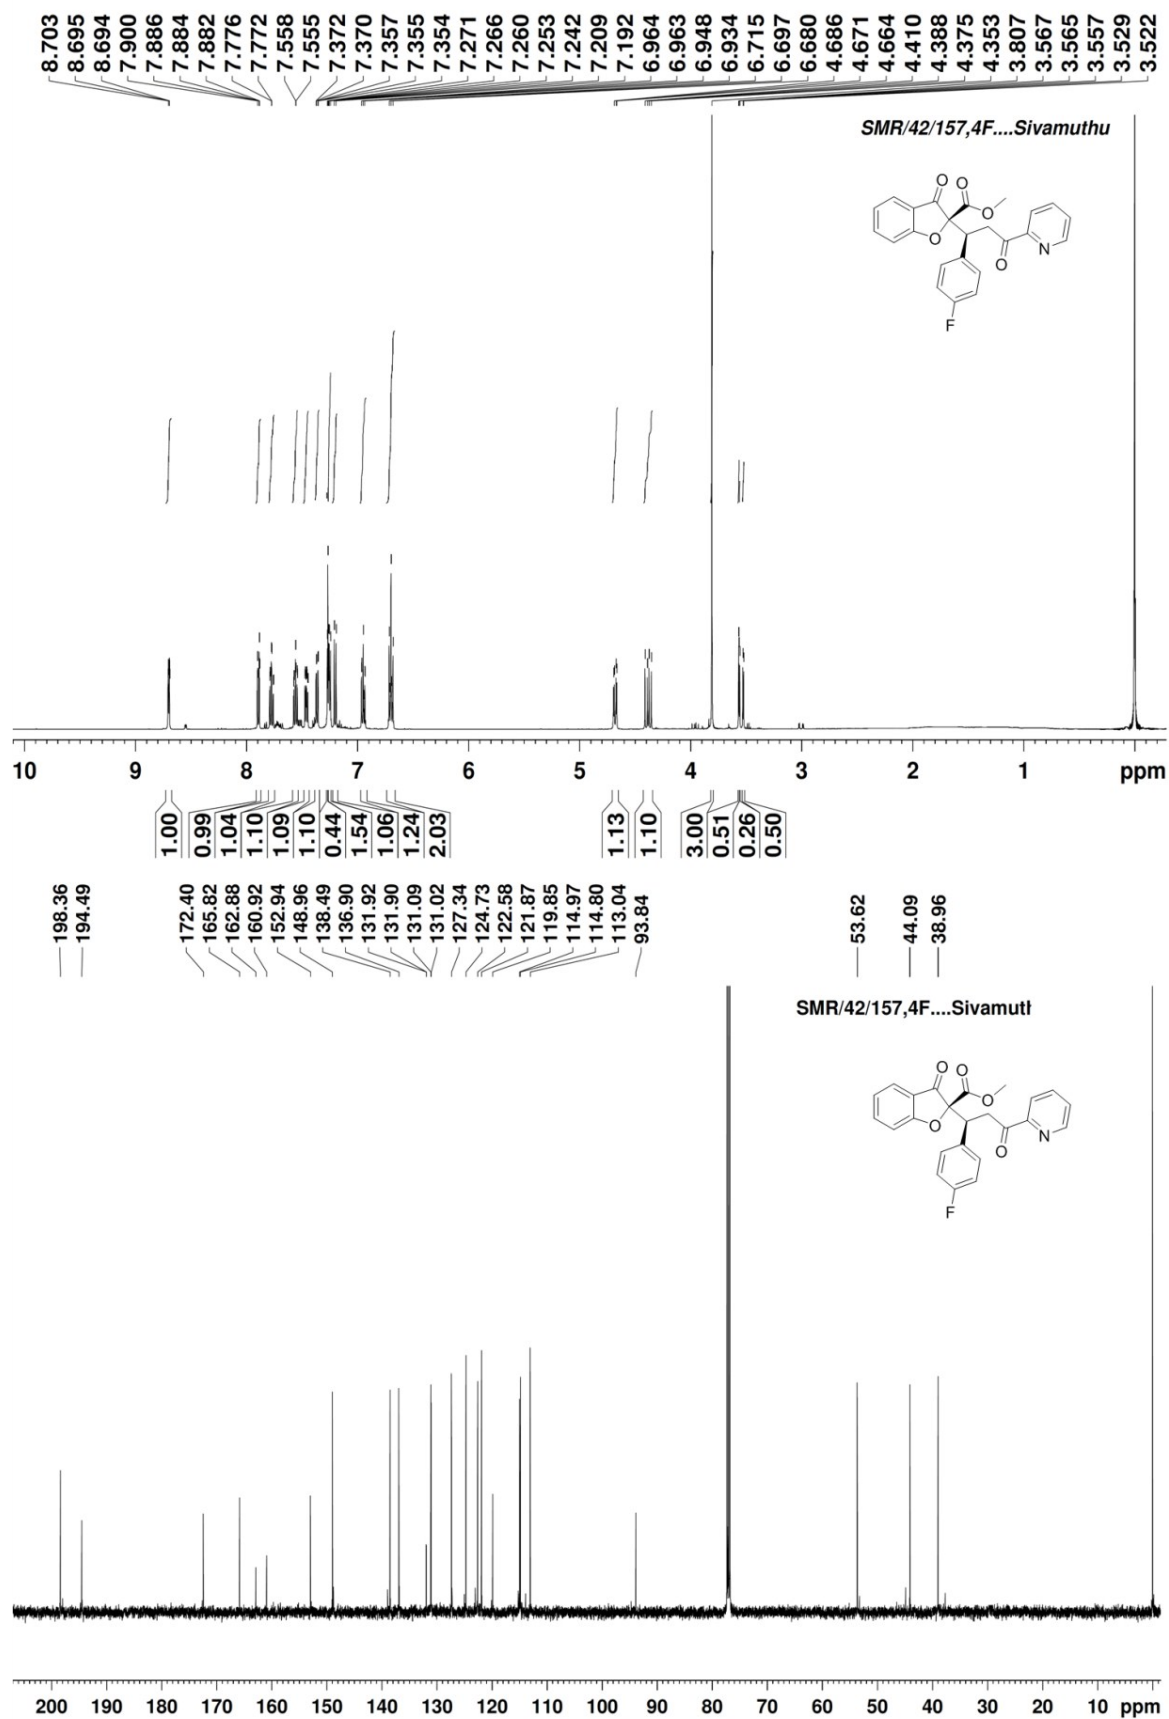

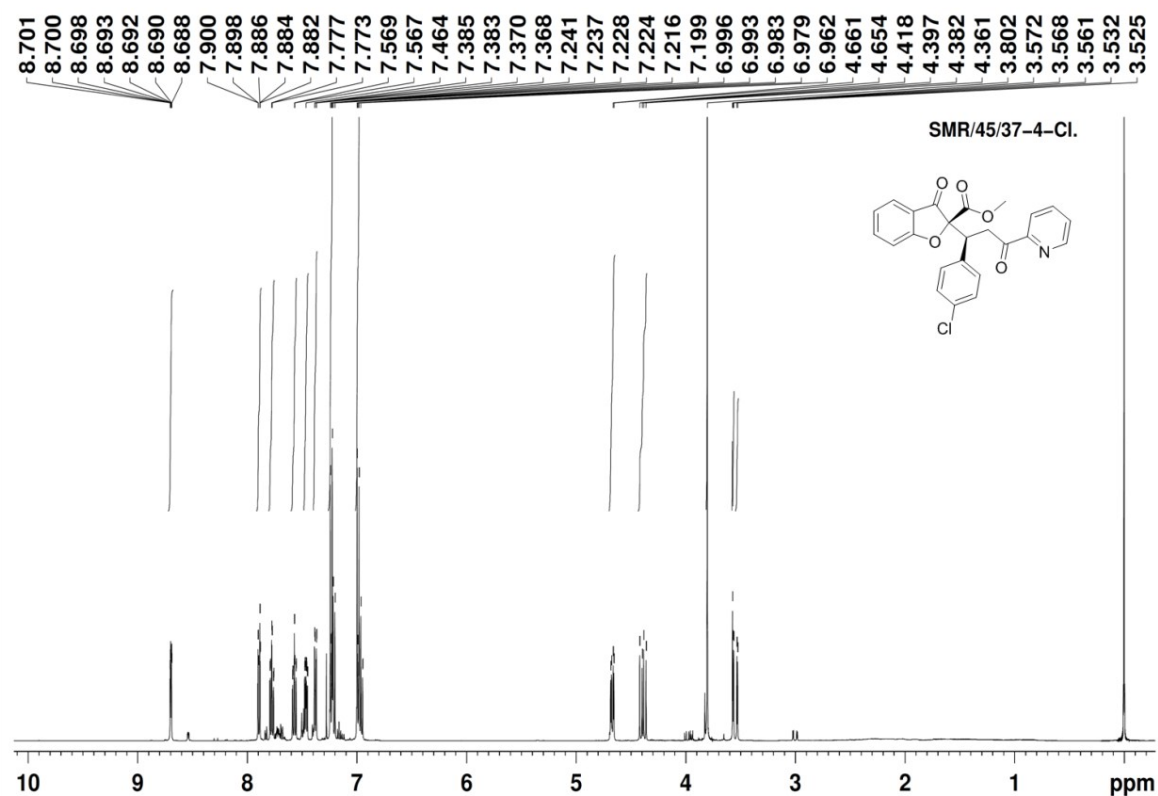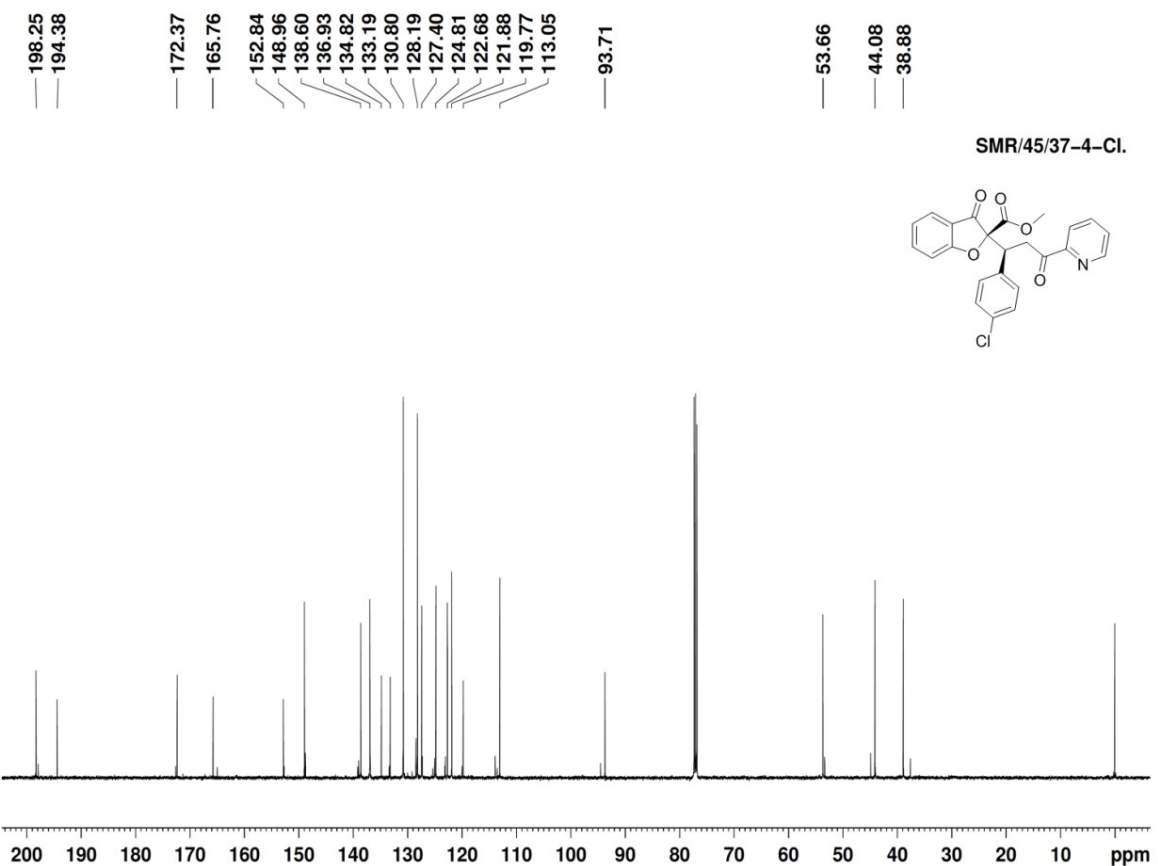

**<sup>1</sup>H and <sup>13</sup>C NMR spectrum of compound 4g**

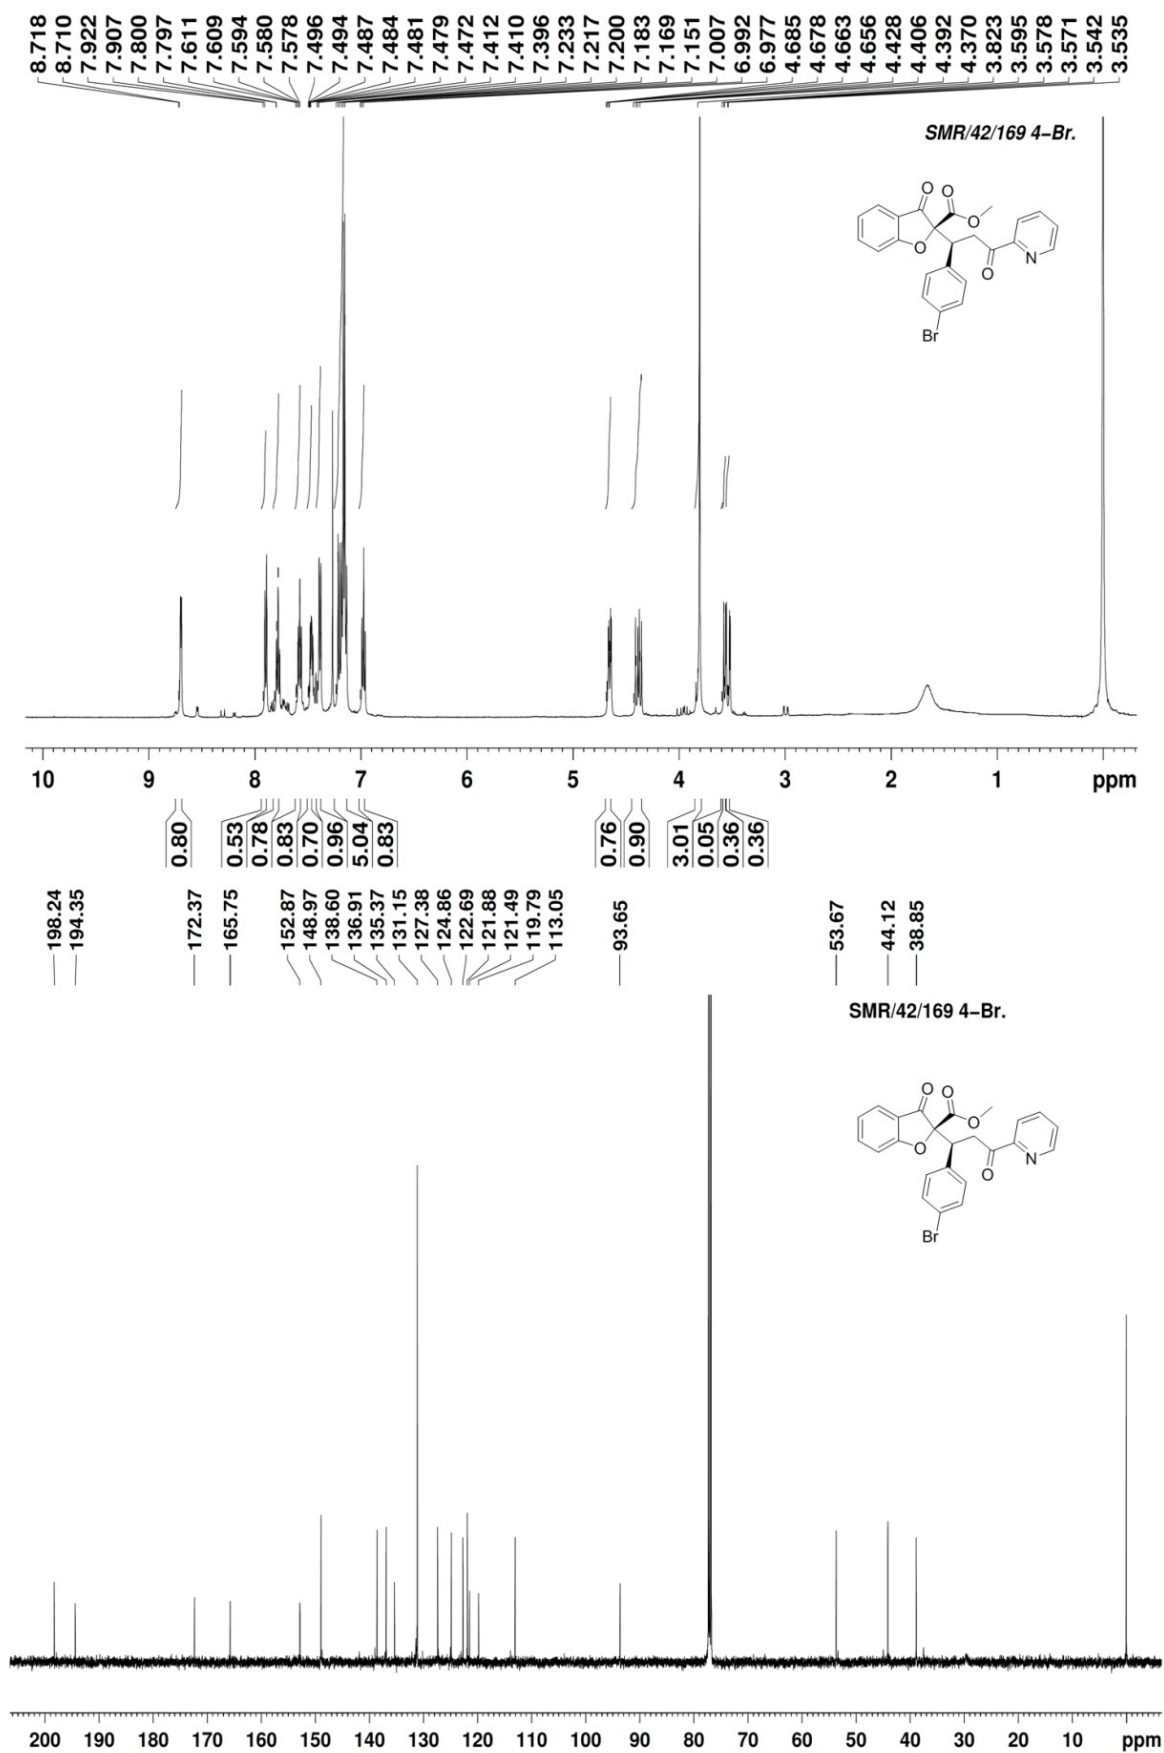



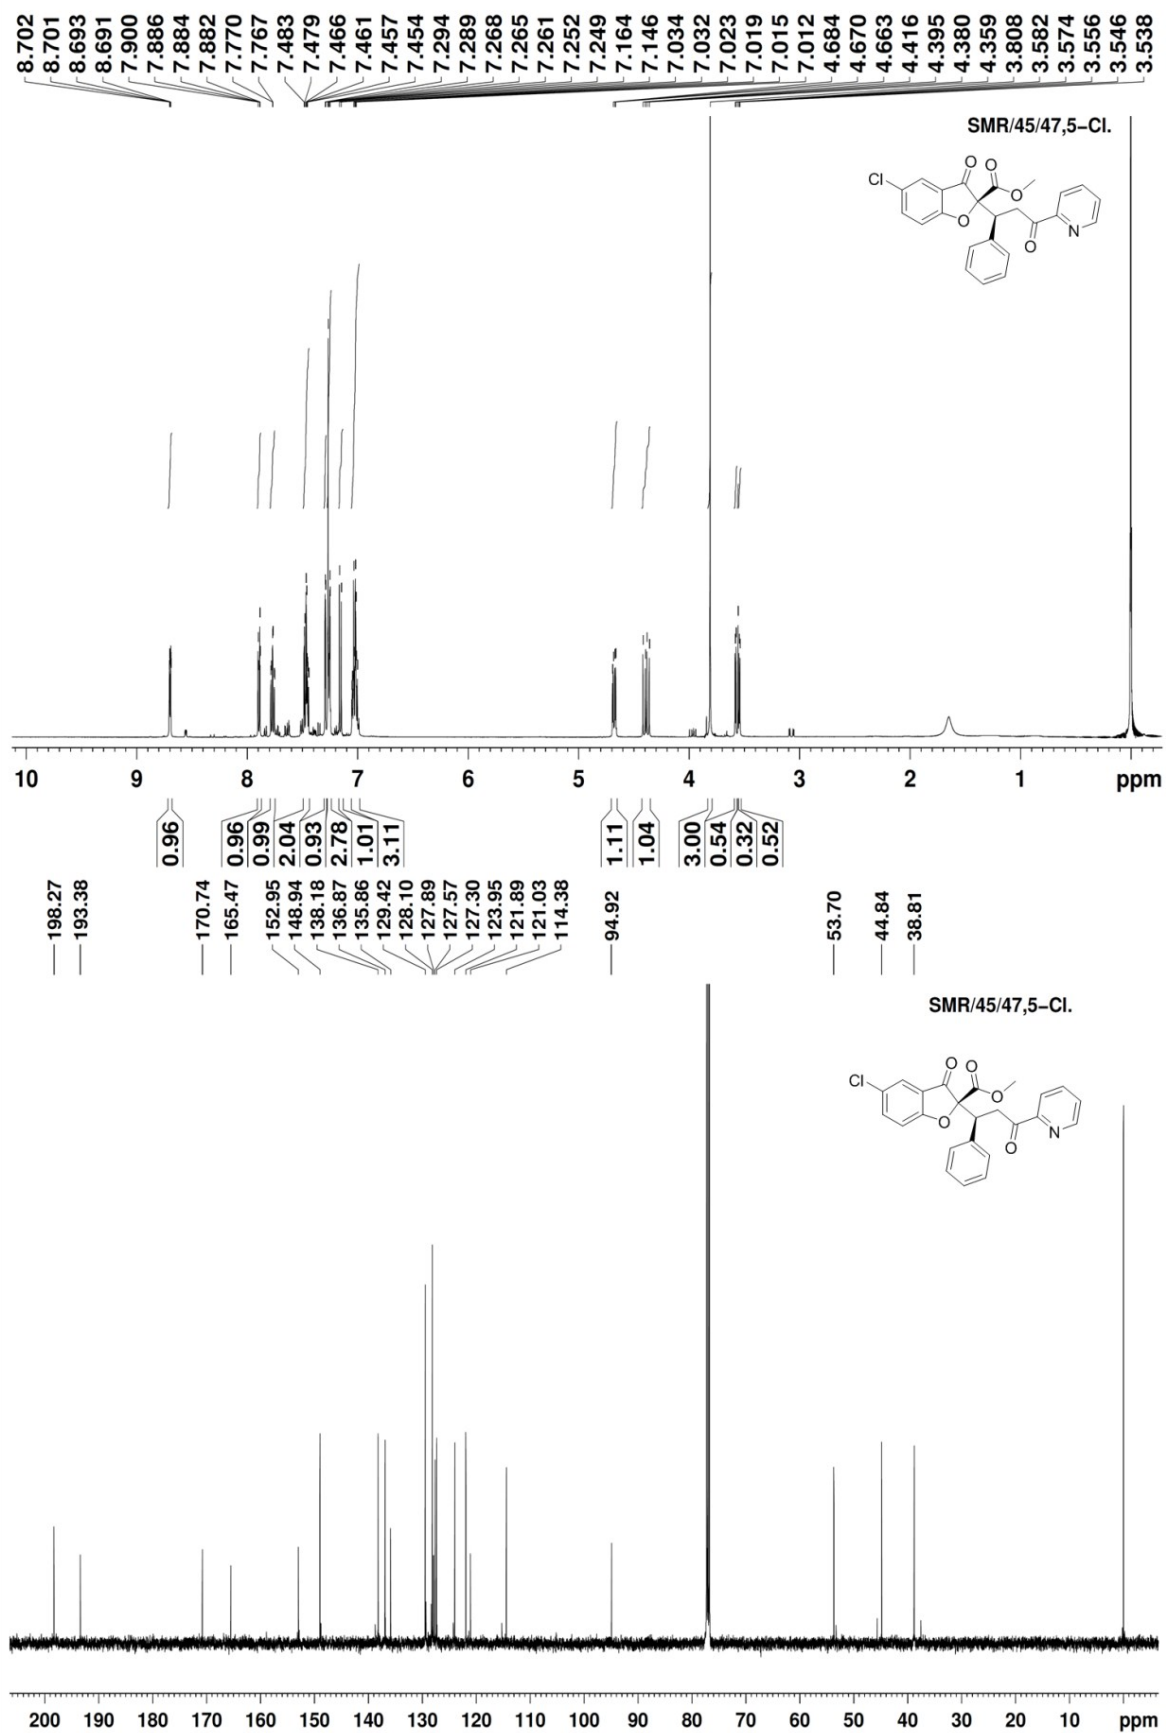

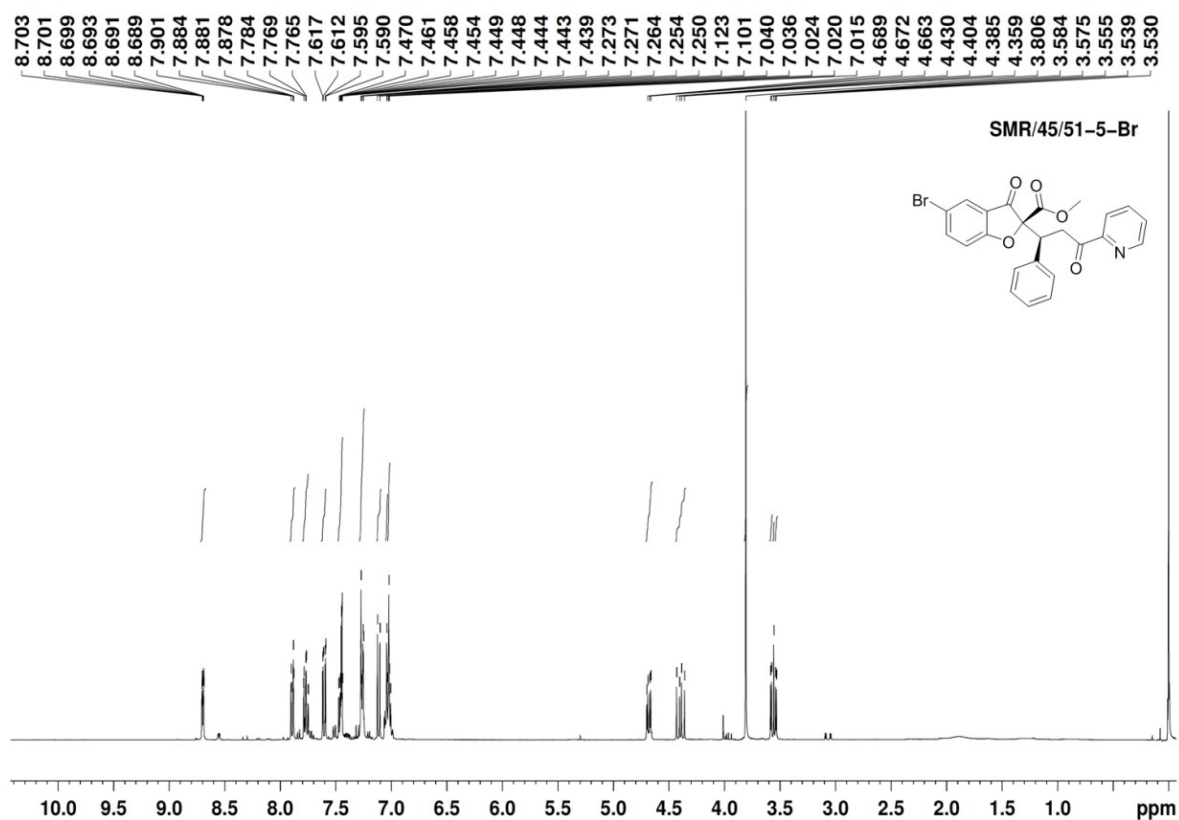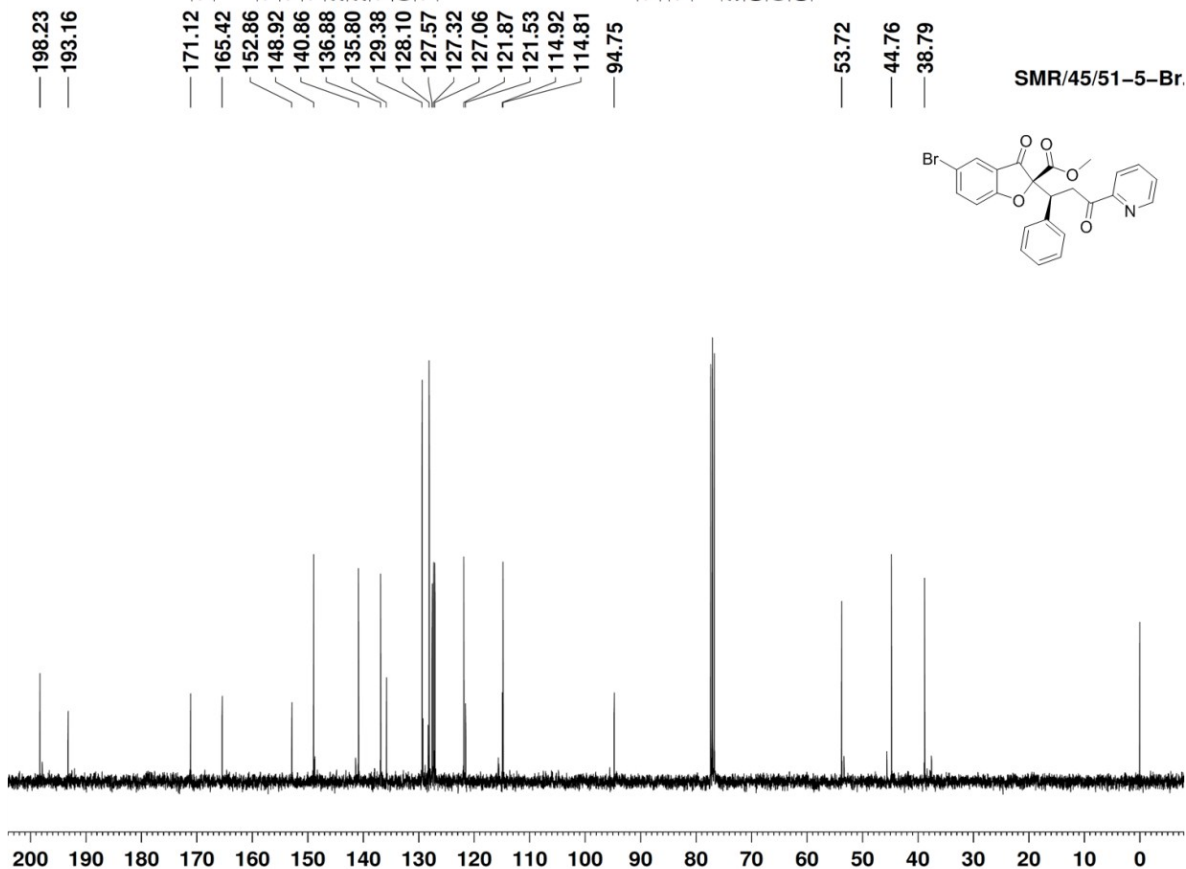

**<sup>1</sup>H and <sup>13</sup>C NMR spectrum of compound 4k**

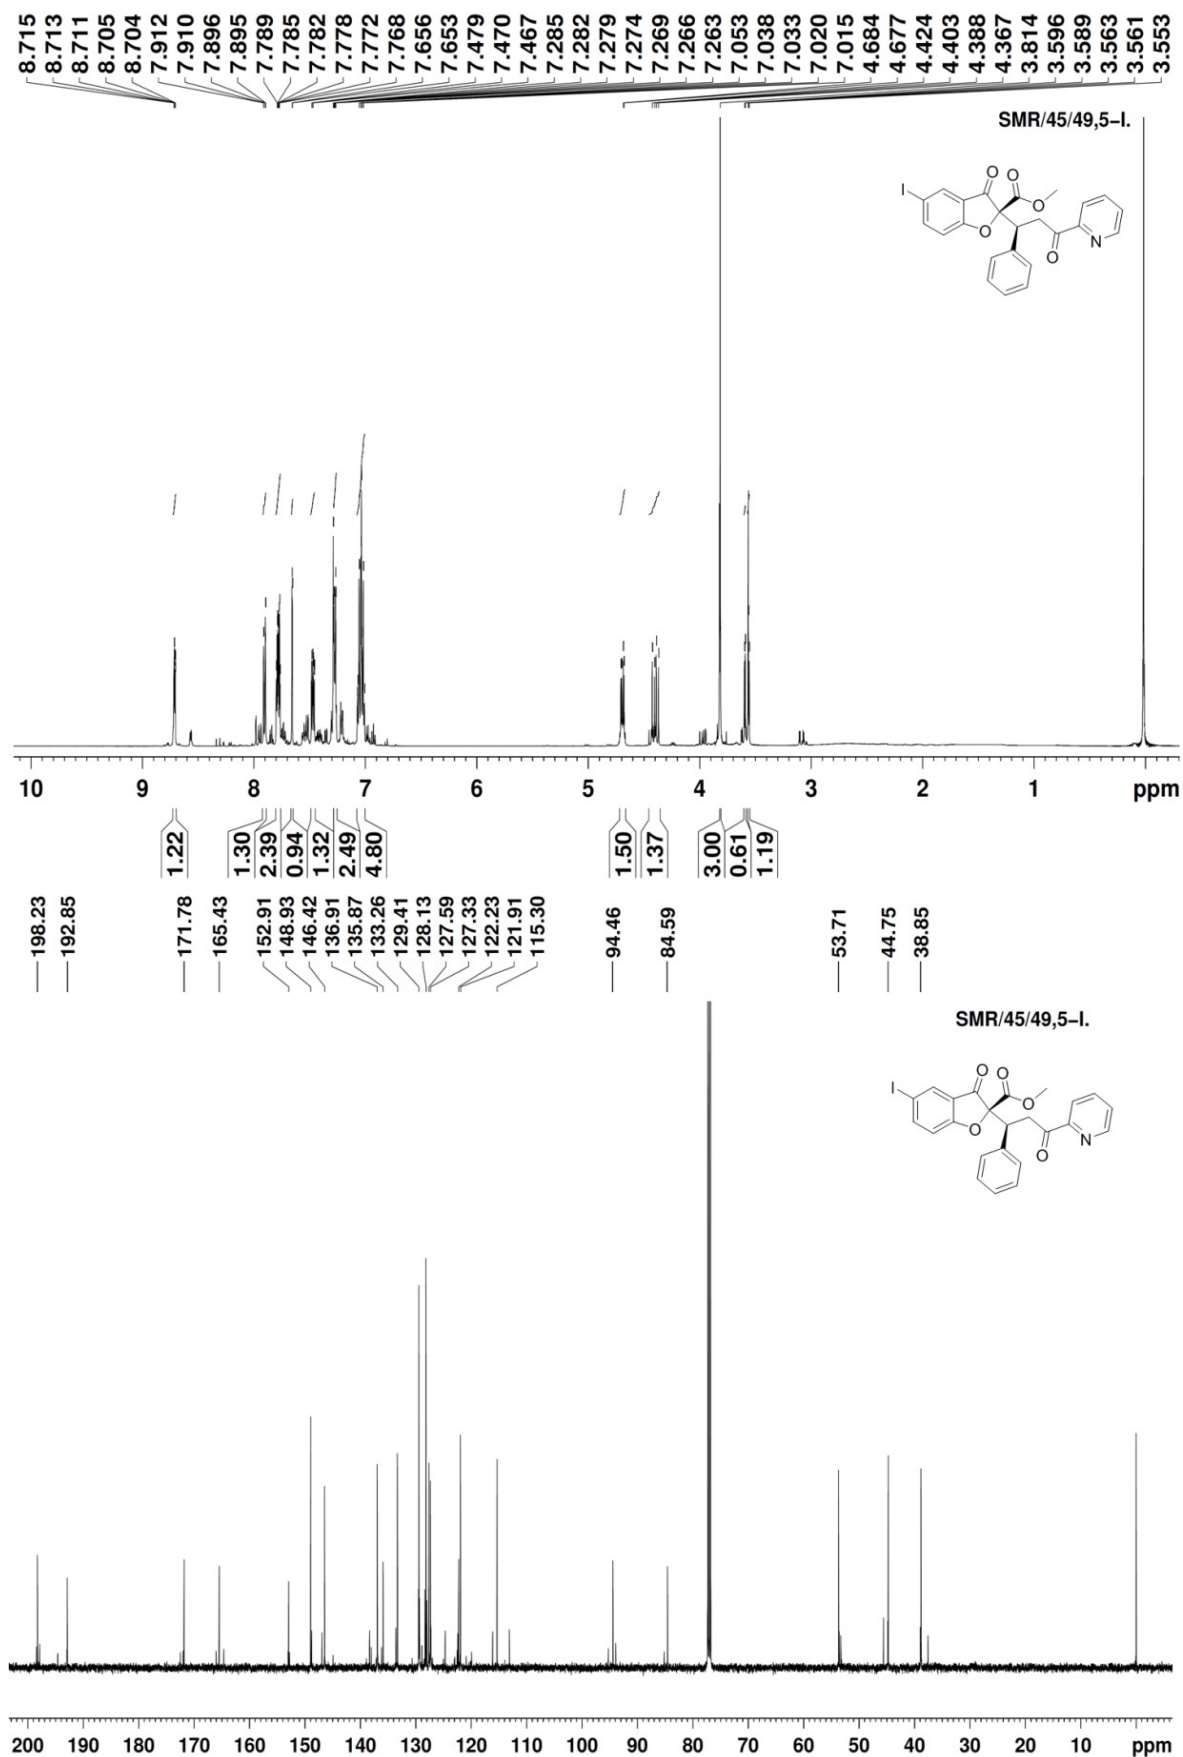

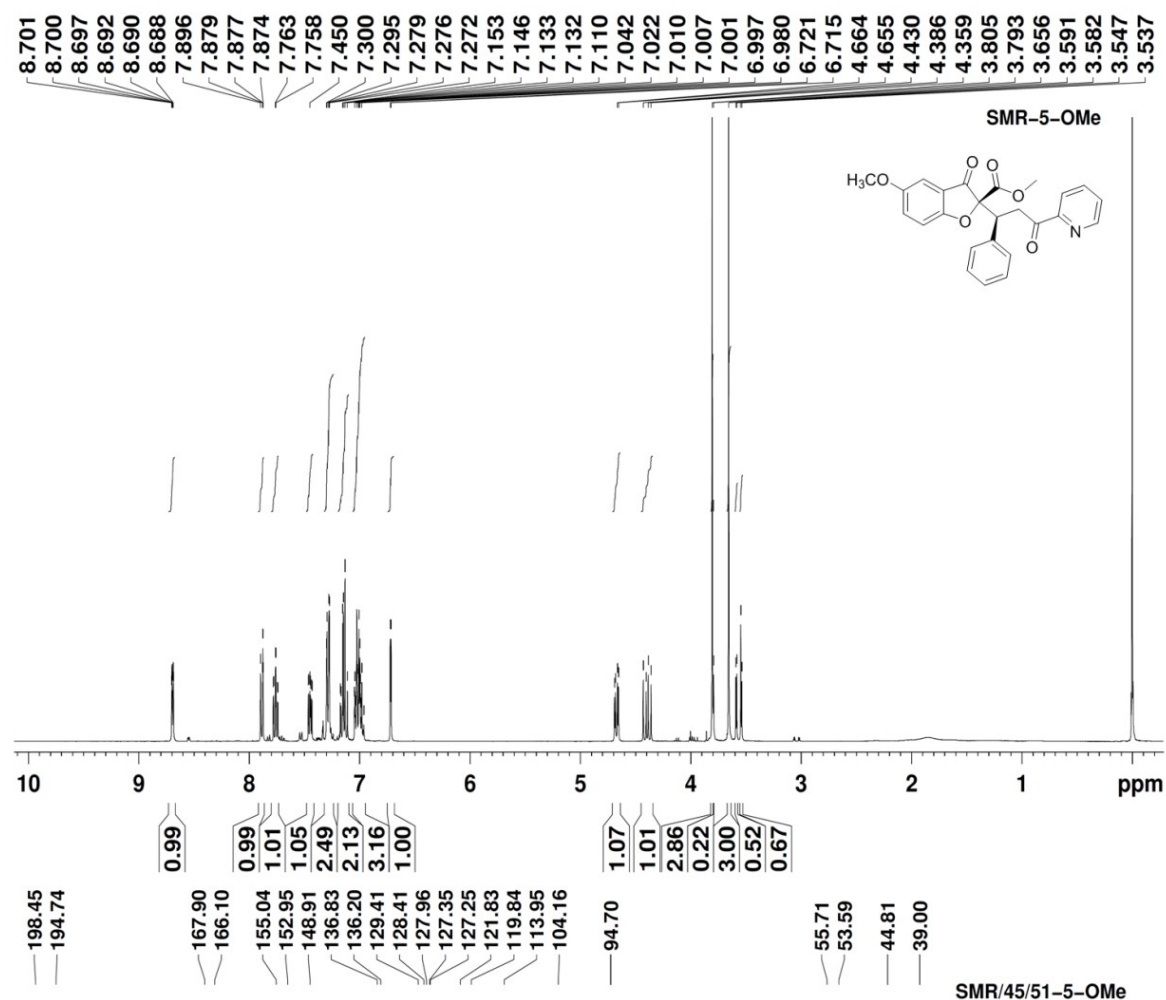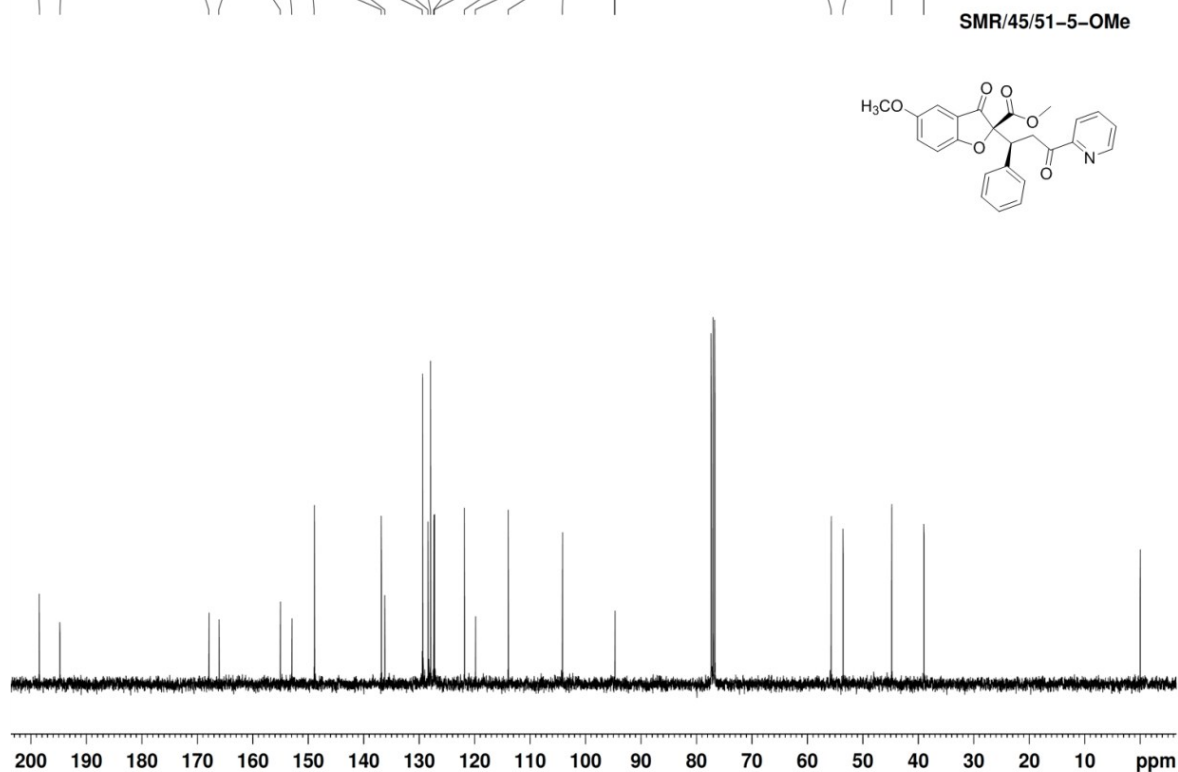

**<sup>1</sup>H and <sup>13</sup>C NMR spectrum of compound 4m**

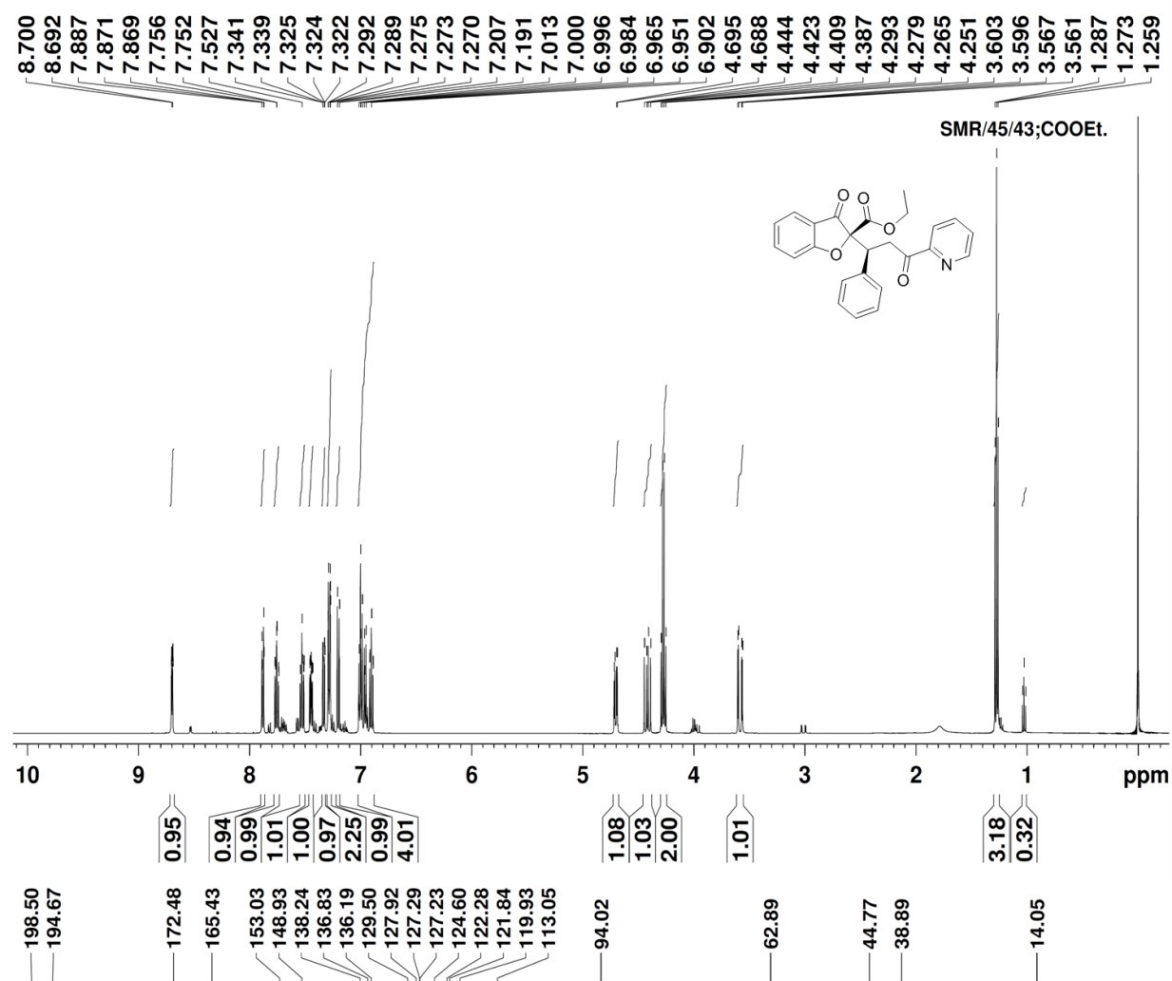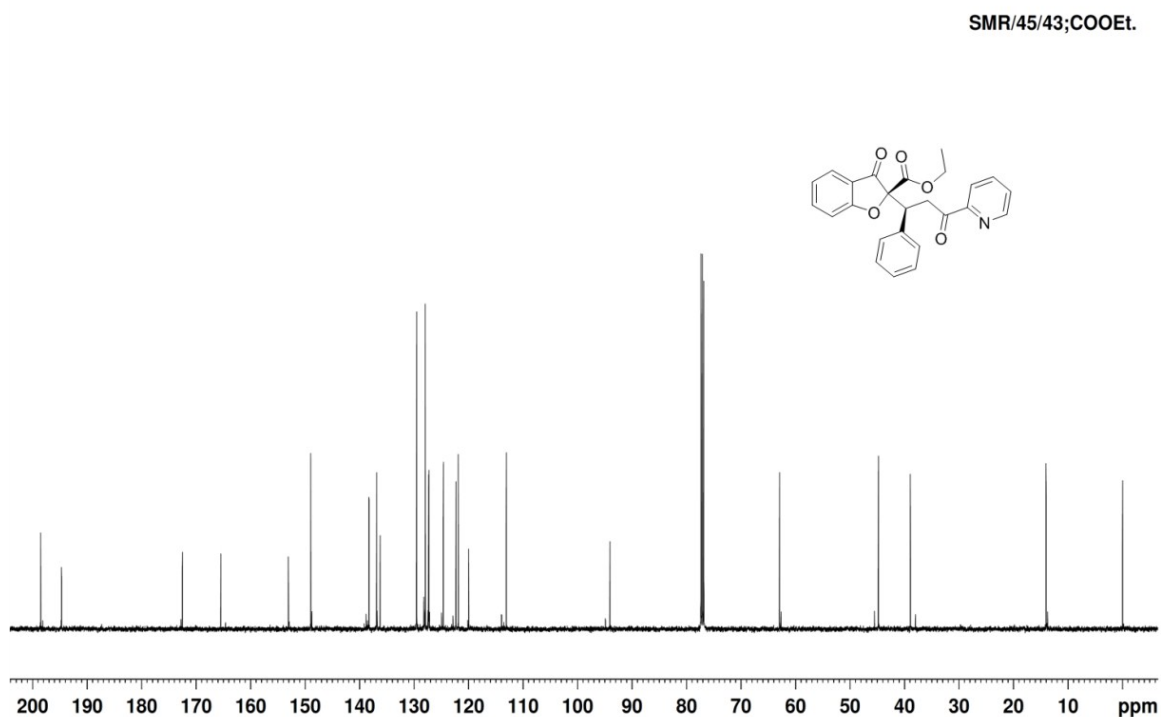

<sup>1</sup>H and <sup>13</sup>C NMR spectrum of compound 4n

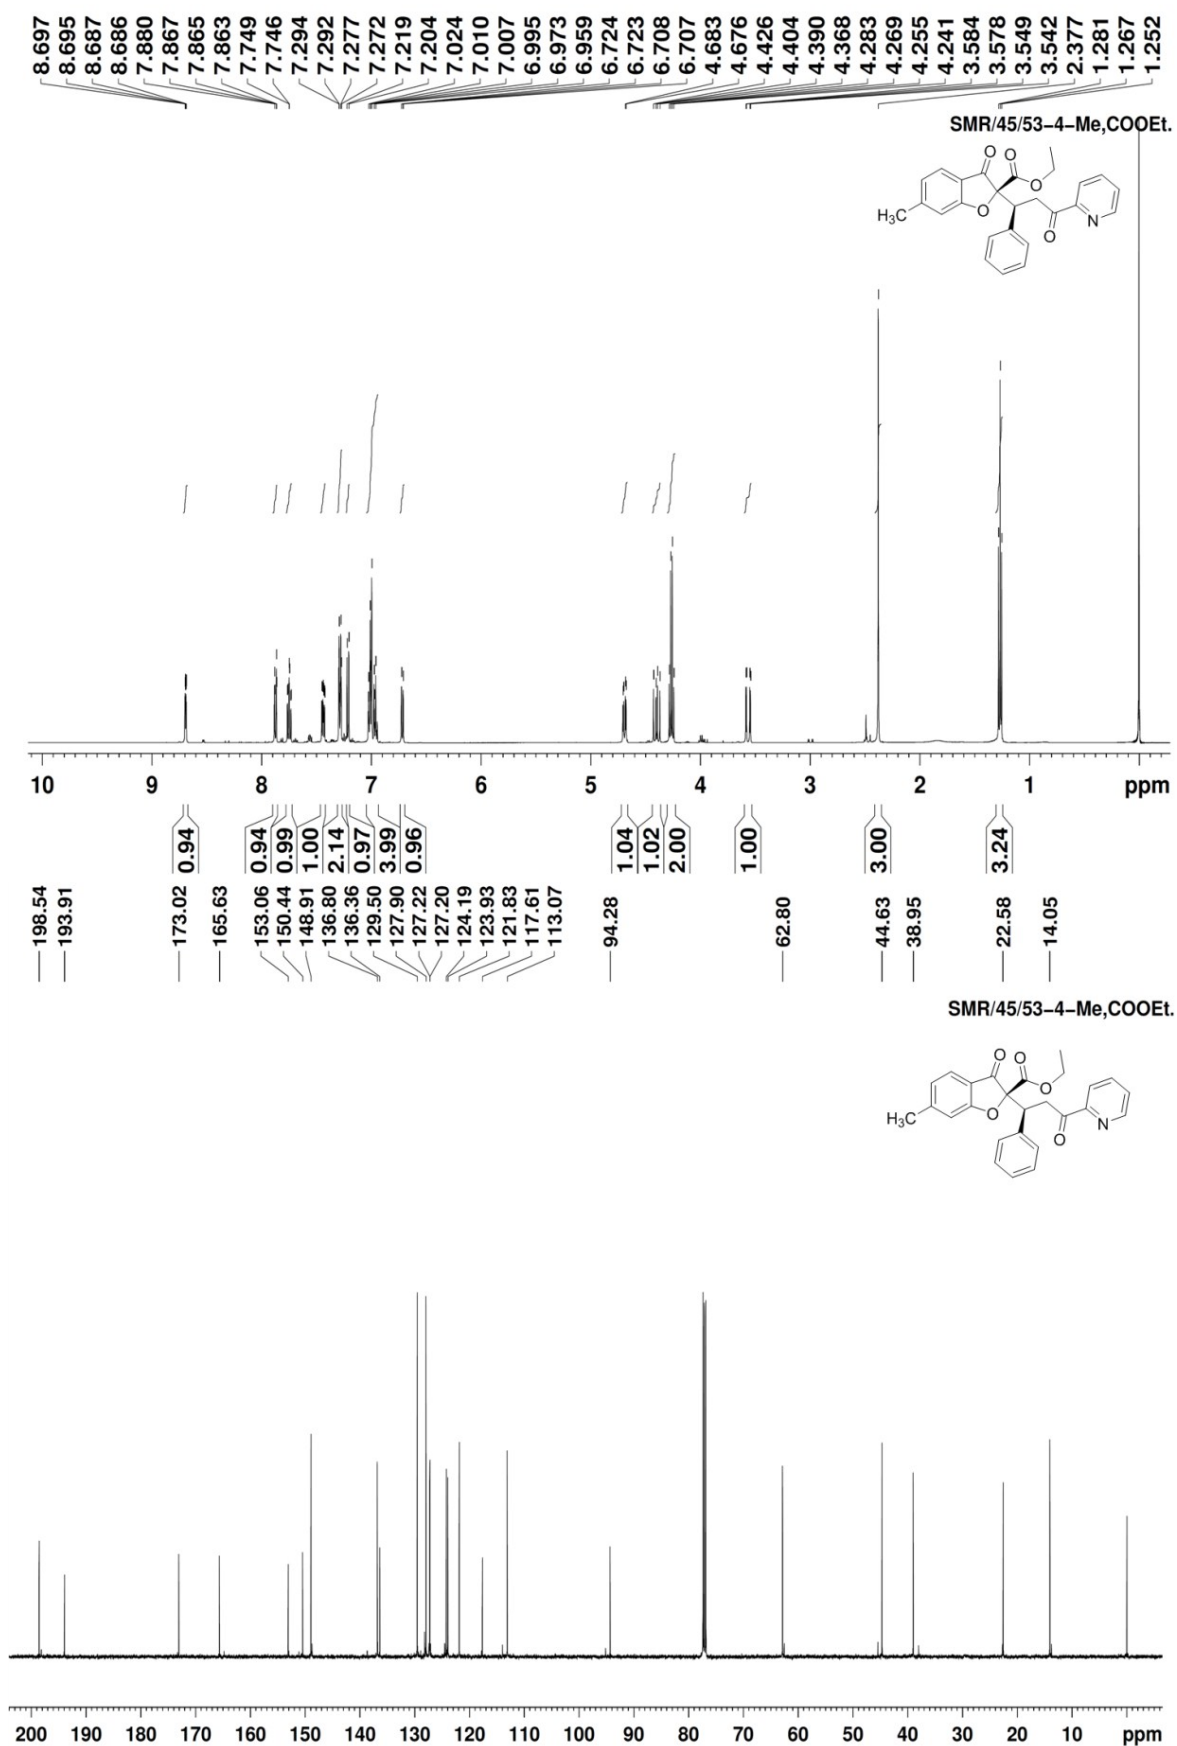

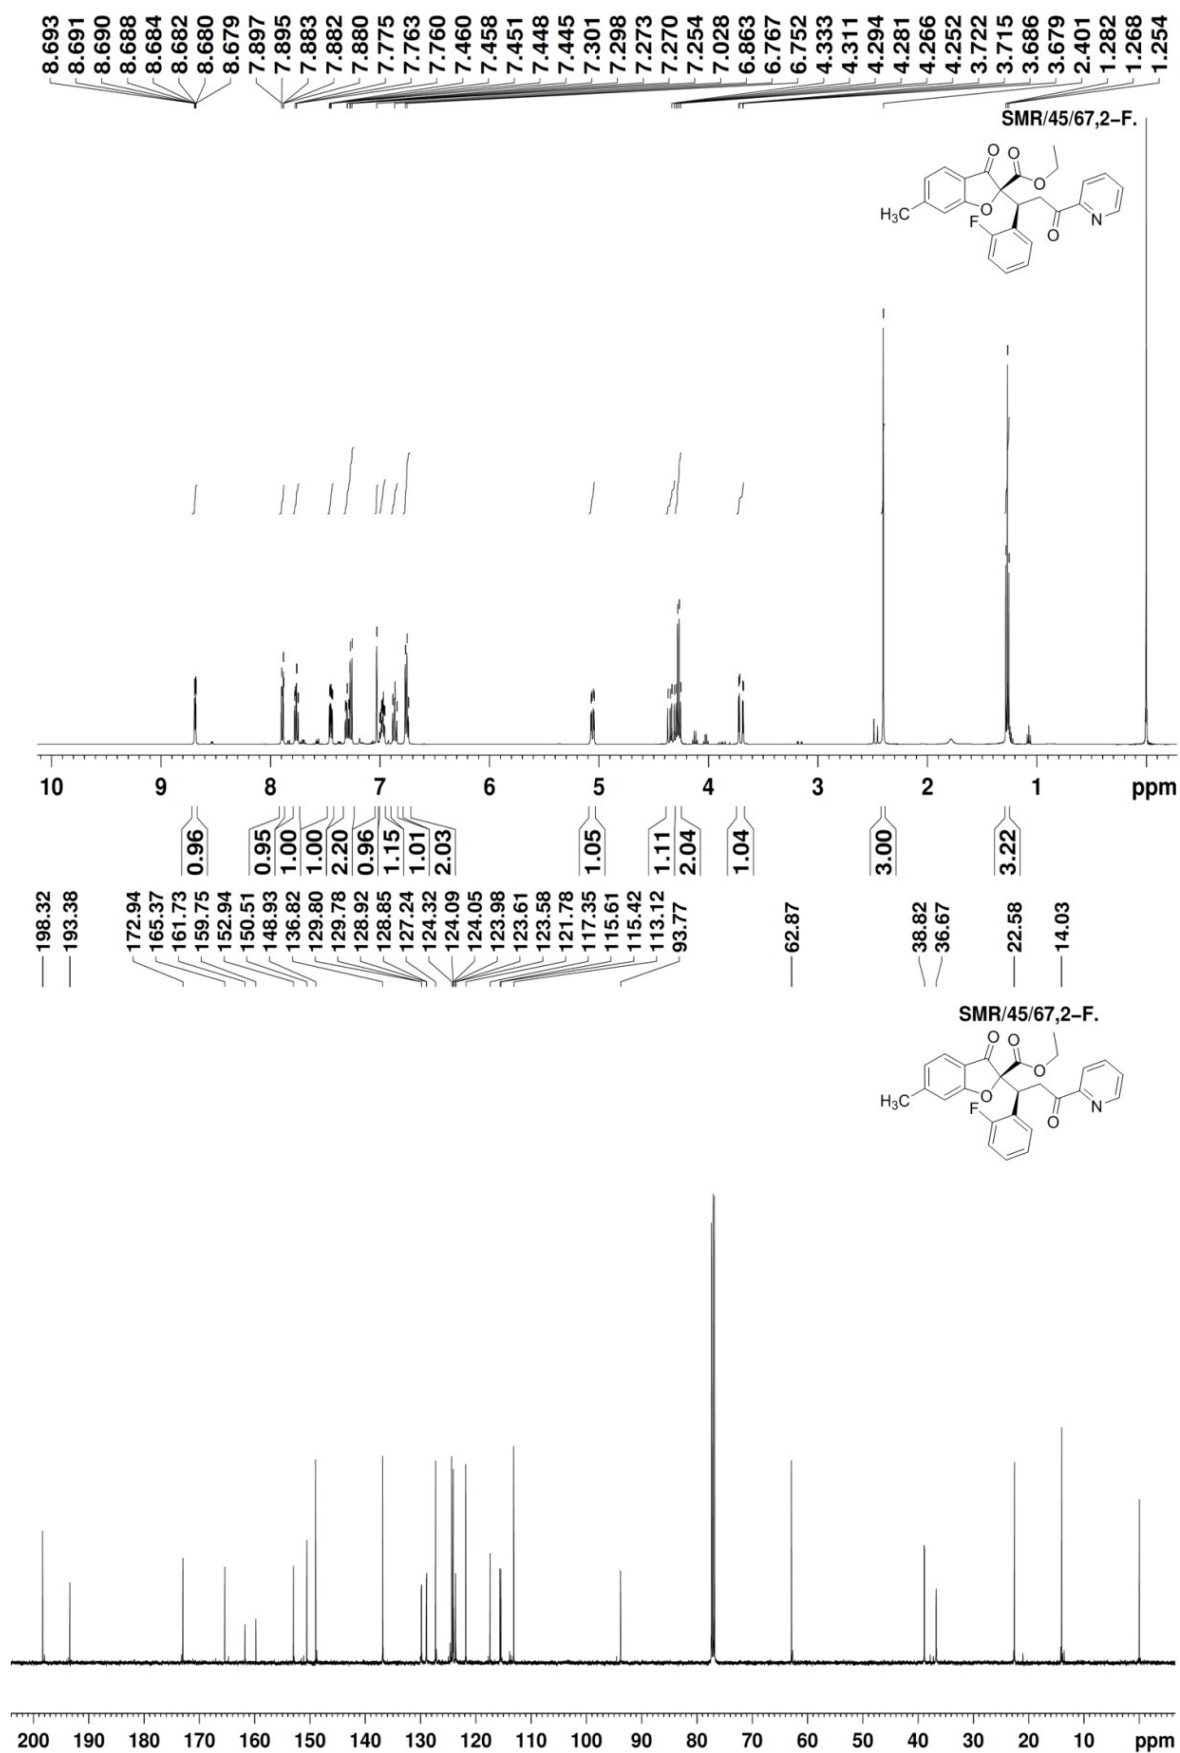

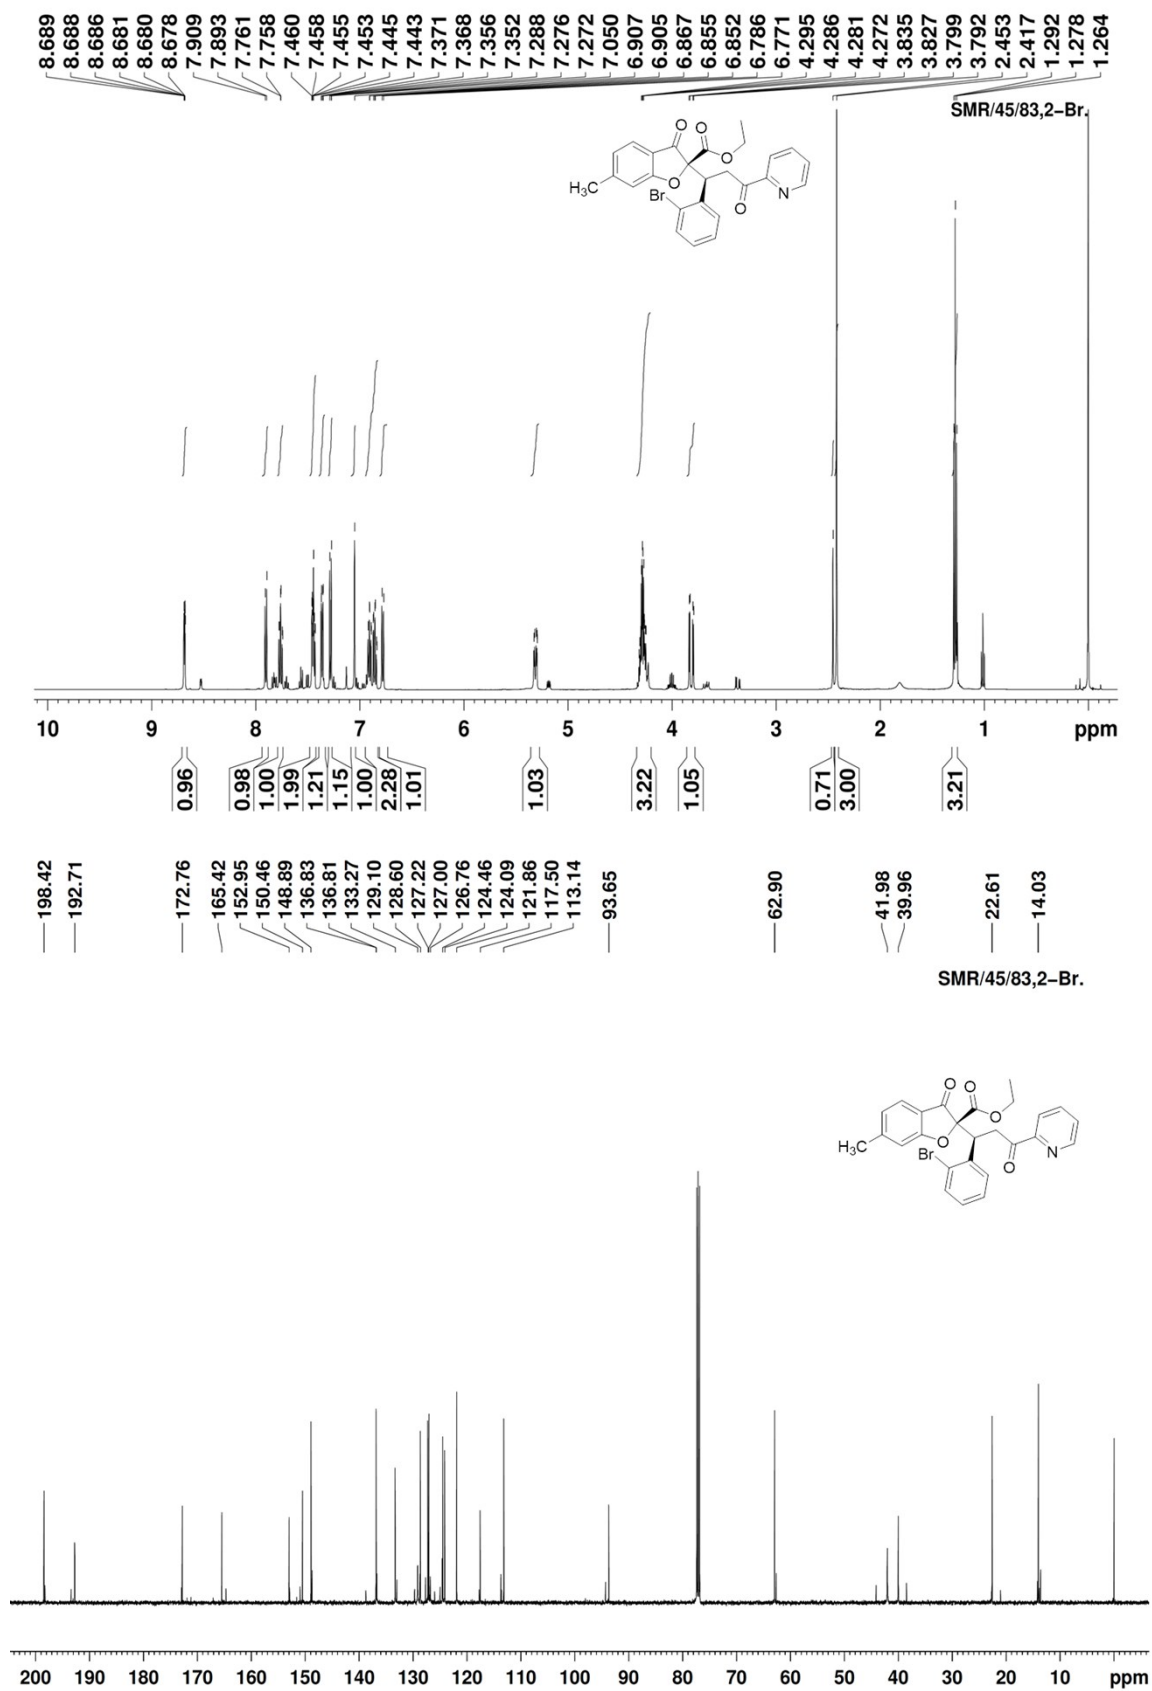

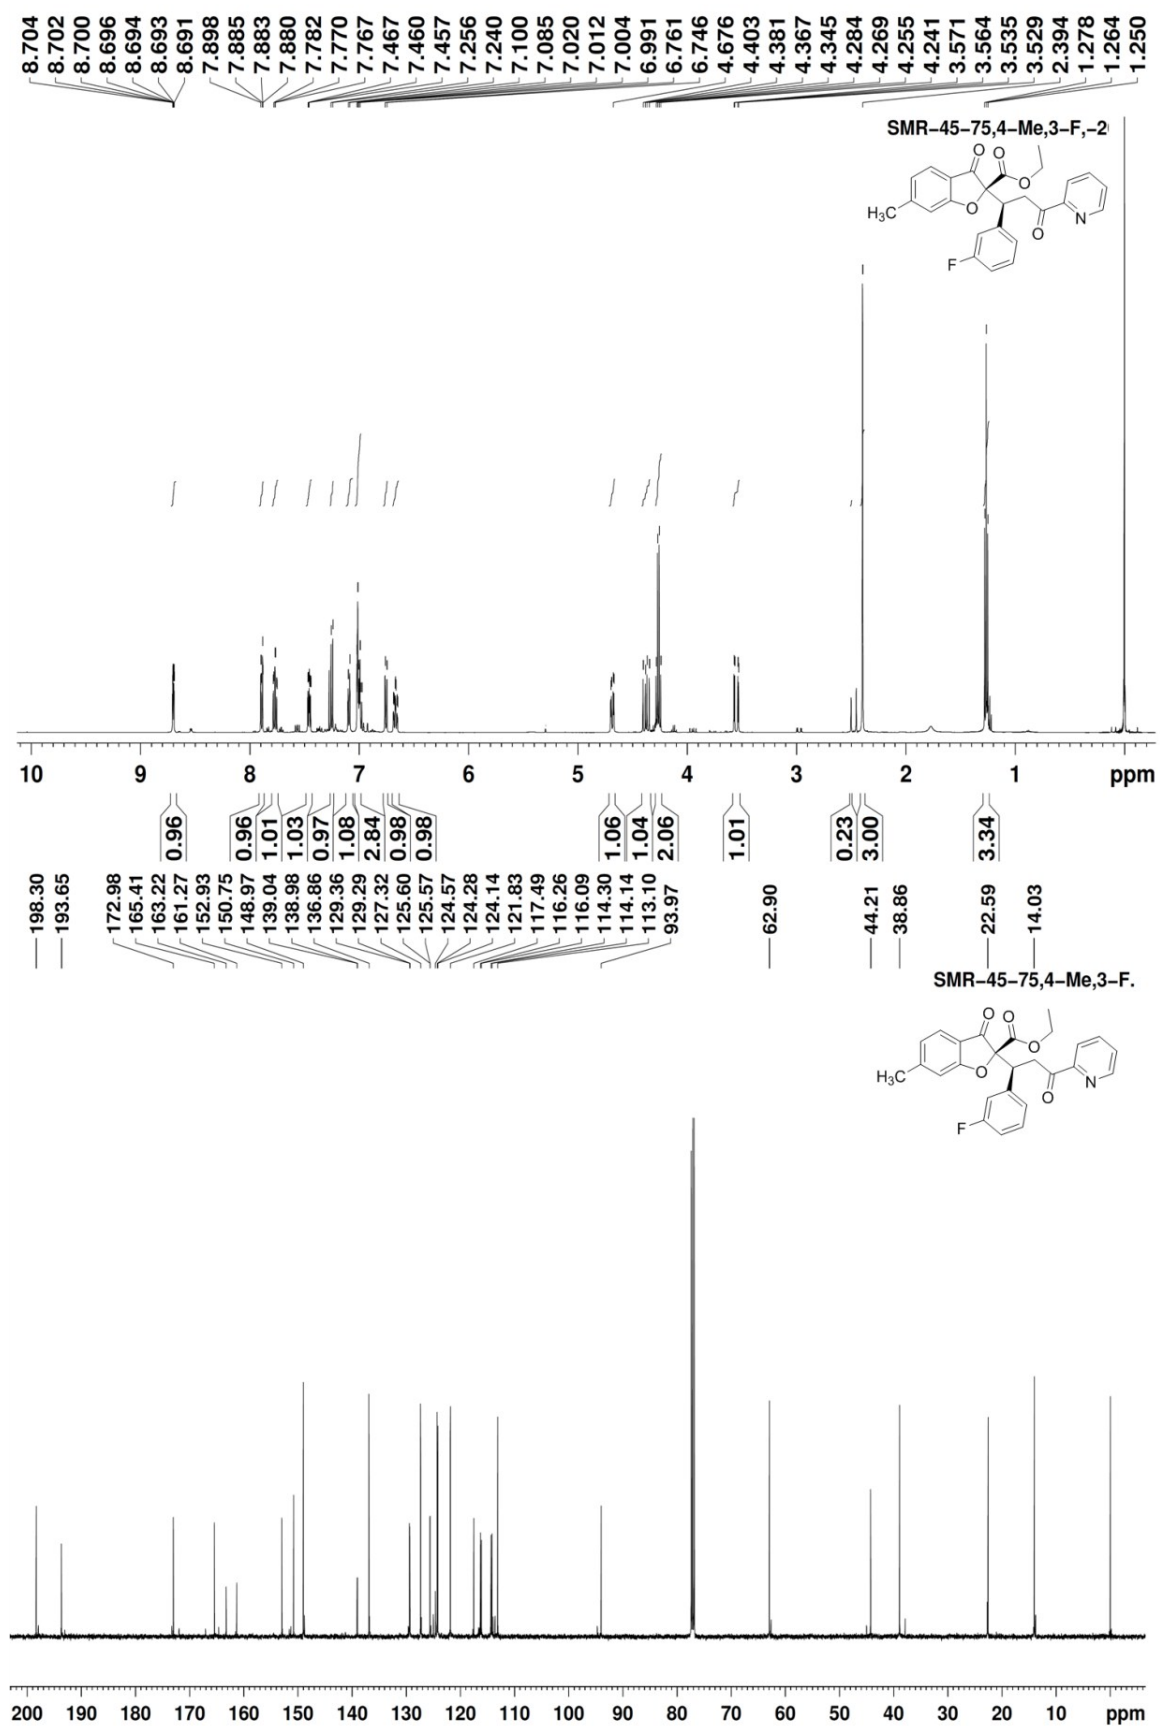

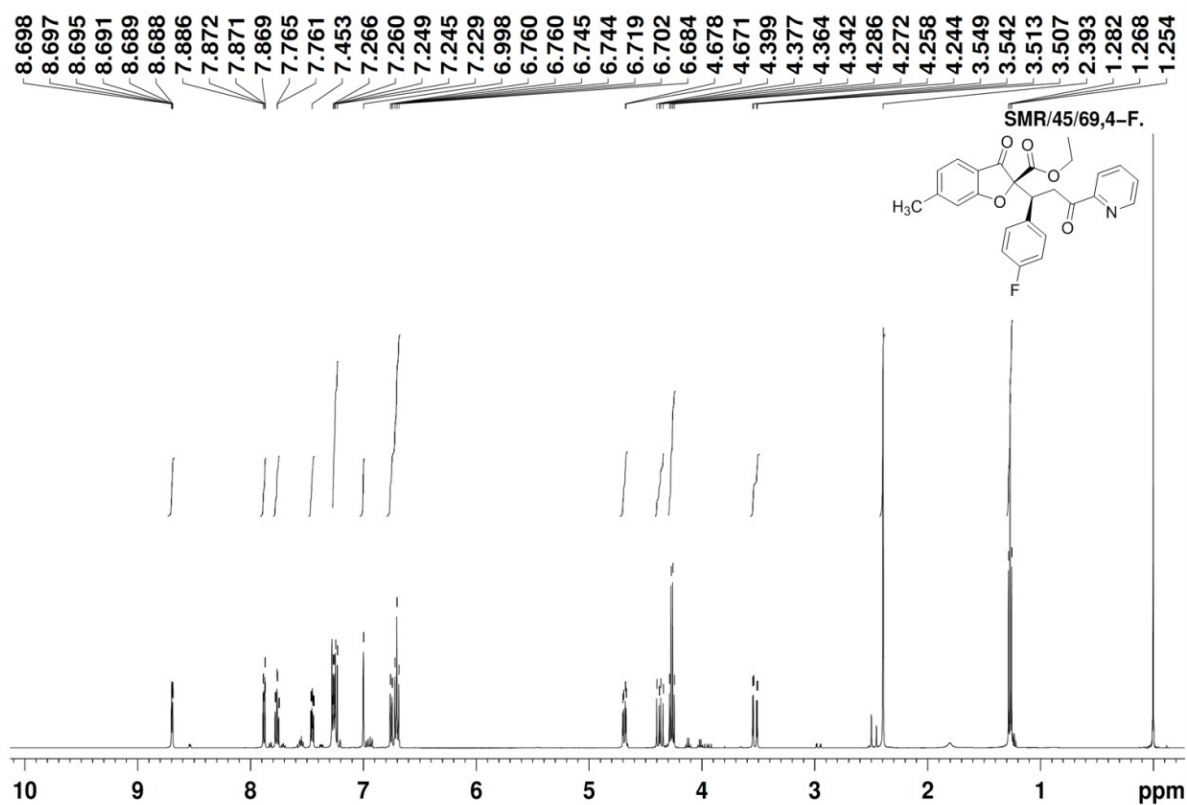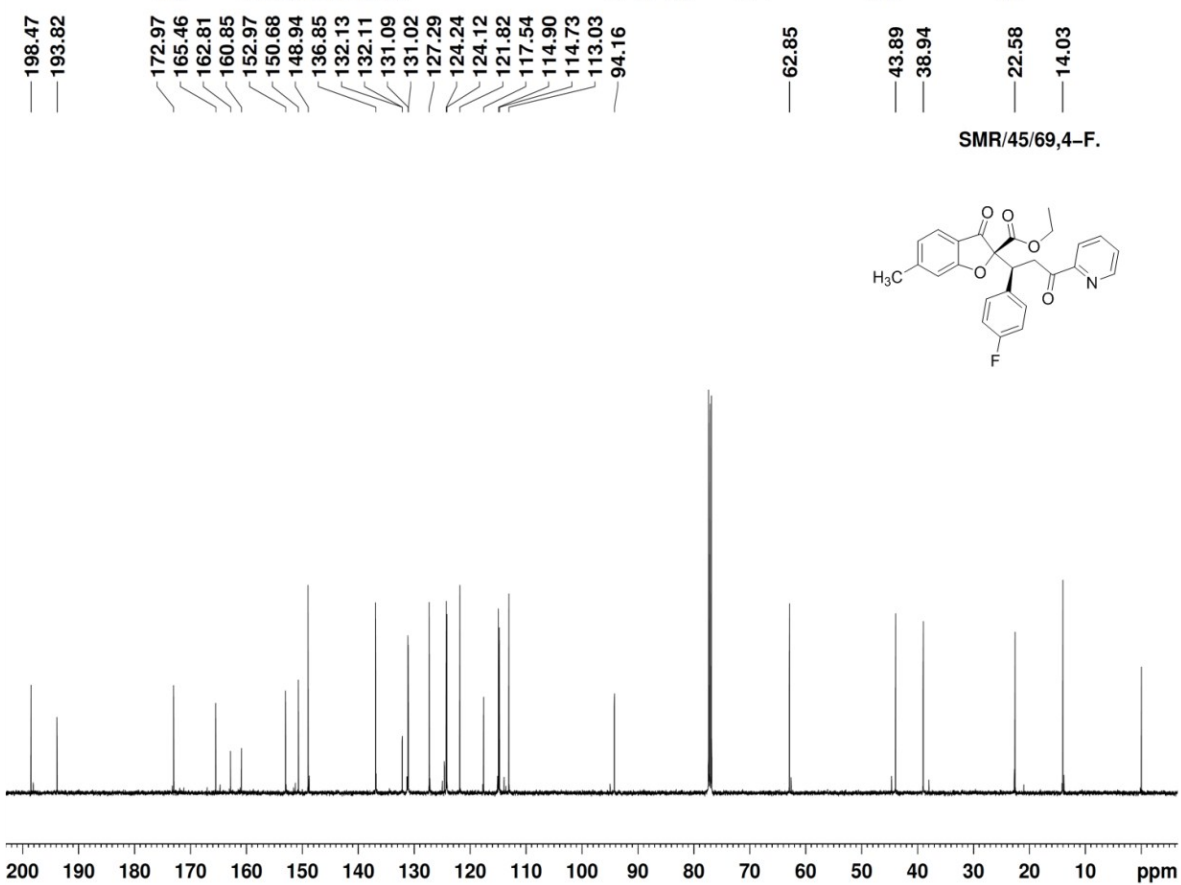

**<sup>1</sup>H and <sup>13</sup>C NMR spectrum of compound 4s**

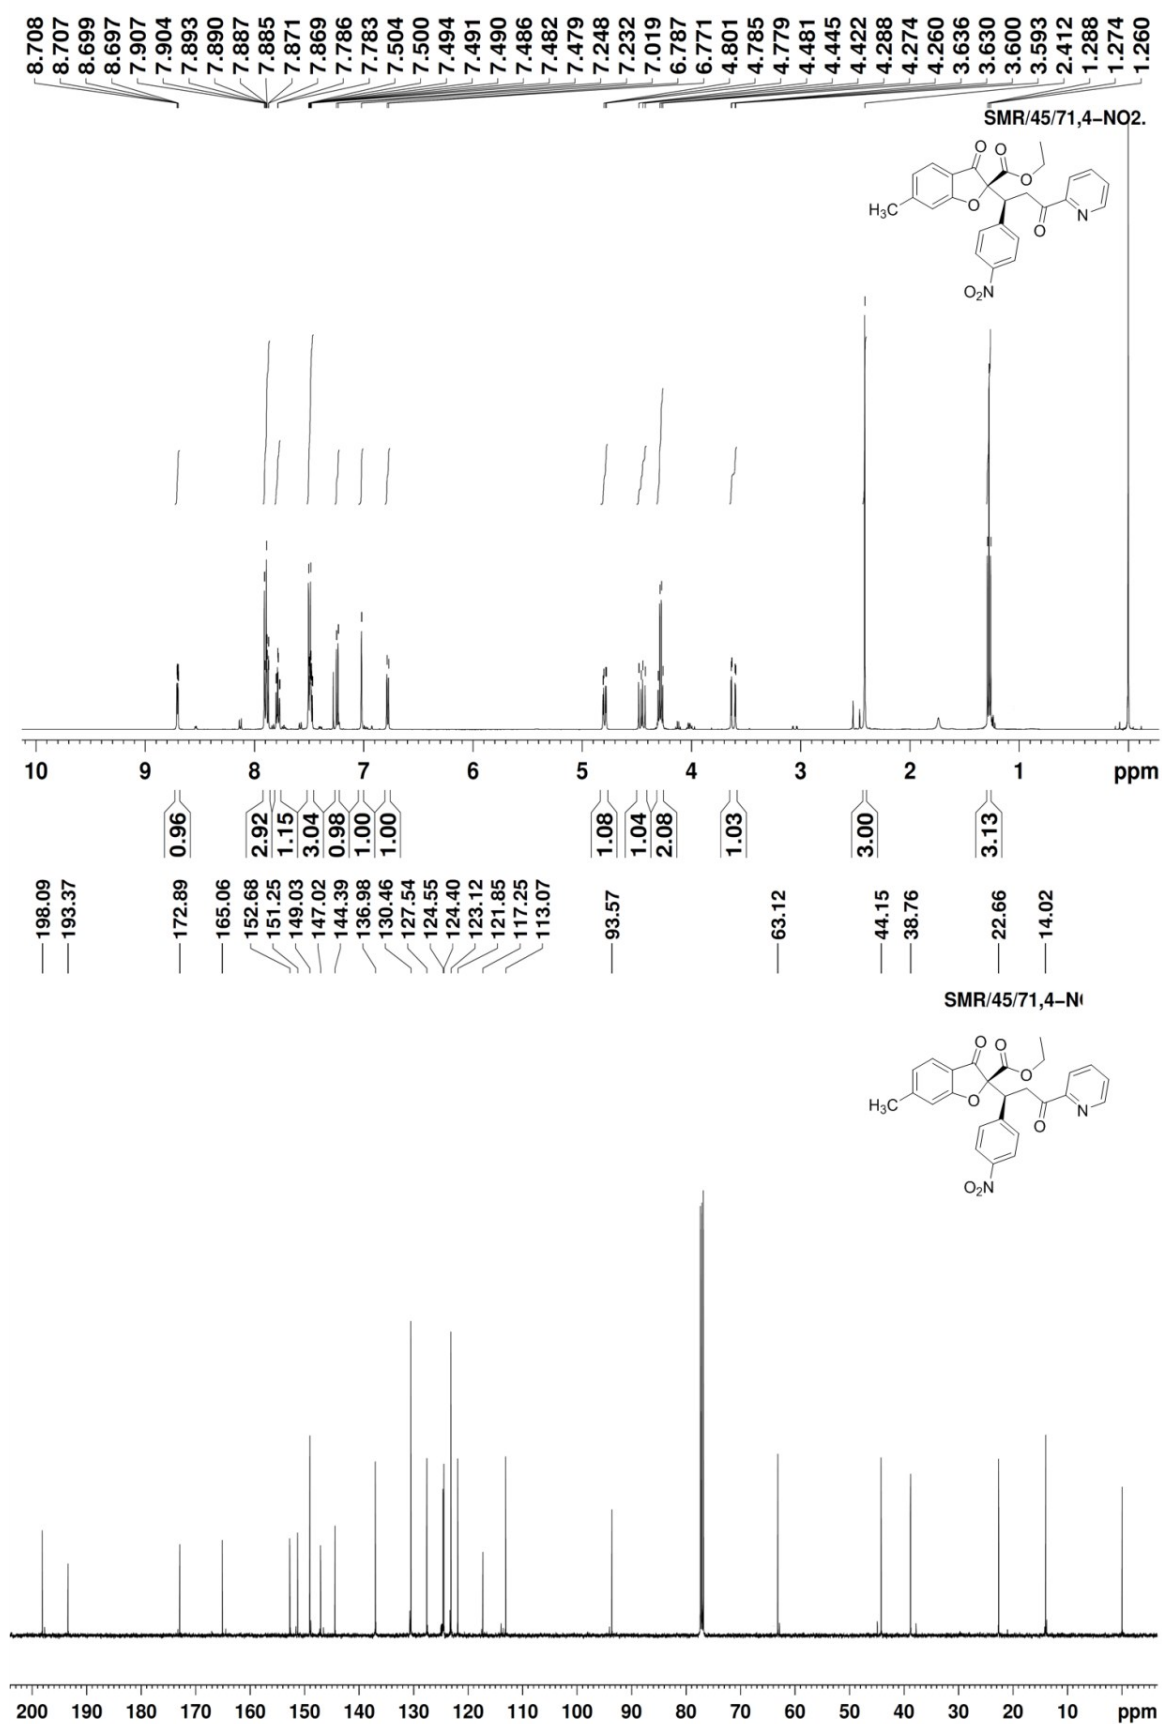

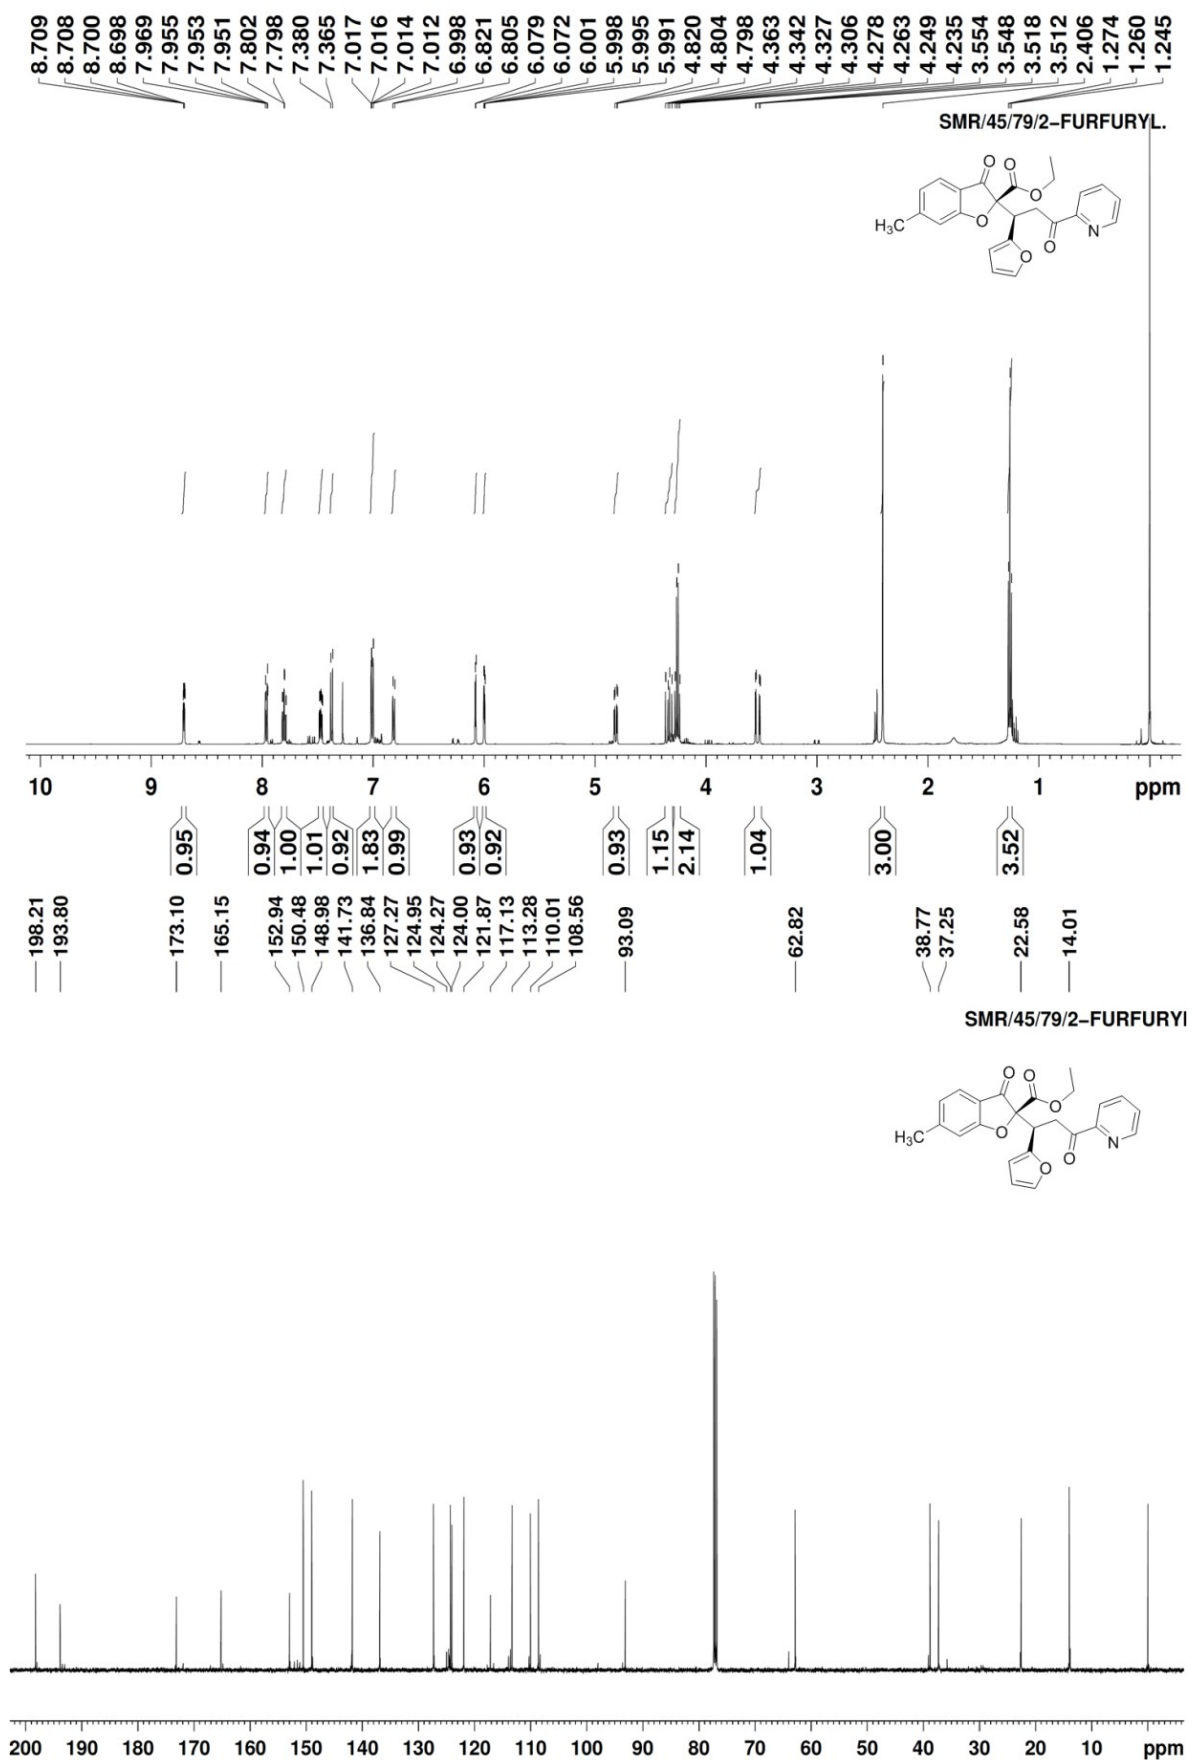

## 8. HPLC chromatogram of compound 4a

D:\...\Substituted Benzofuranone+Acetyl pyridine Chalcone\Reproducibility\SMR (RACE,20IPA,1ML,phox).lcd  
mAU

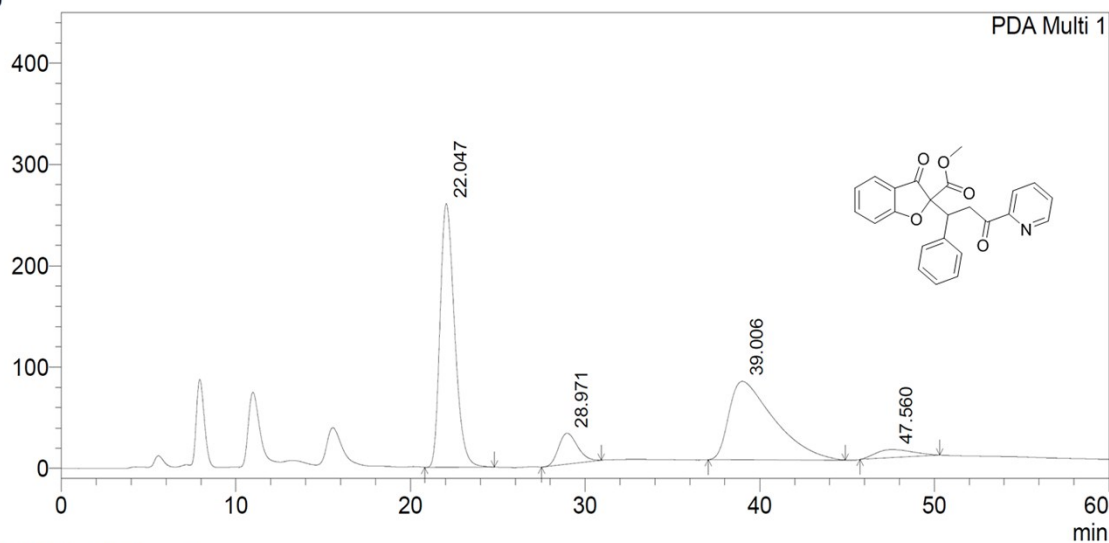

1 PDA Multi 1/254nm 4nm

PeakTable

PDA Ch1 254nm 4nm

| Peak# | Ret. Time | Area     | Height | Area %  | Height % |
|-------|-----------|----------|--------|---------|----------|
| 1     | 22.047    | 15011549 | 260196 | 46.303  | 69.160   |
| 2     | 28.971    | 2296261  | 30532  | 7.083   | 8.115    |
| 3     | 39.006    | 13931431 | 77443  | 42.972  | 20.584   |
| 4     | 47.560    | 1180907  | 8053   | 3.643   | 2.140    |
| Total |           | 32420147 | 376224 | 100.000 | 100.000  |

<Chromatogram>

D:\...\Reproducibility\SMR (reproducibility,20IPA,1ML,phox).lcd

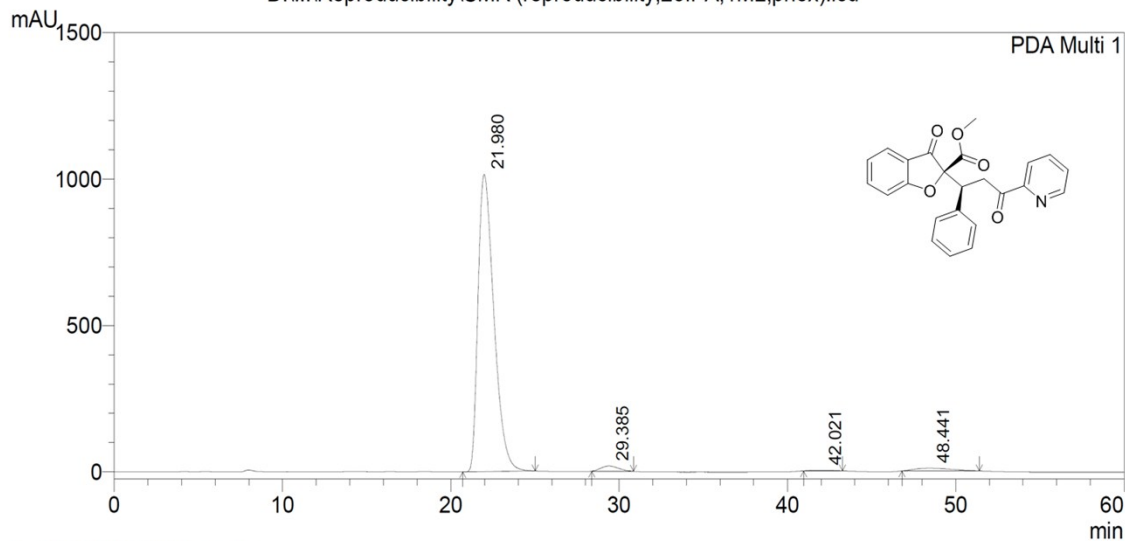

1 PDA Multi 1/254nm 4nm

PeakTable

PDA Ch1 254nm 4nm

| Peak# | Ret. Time | Area     | Height  | Area %  | Height % |
|-------|-----------|----------|---------|---------|----------|
| 1     | 21.980    | 66511884 | 1015093 | 95.768  | 97.183   |
| 2     | 29.385    | 1293681  | 17709   | 1.863   | 1.695    |
| 3     | 42.021    | 207751   | 2398    | 0.299   | 0.230    |
| 4     | 48.441    | 1437442  | 9313    | 2.070   | 0.892    |
| Total |           | 69450758 | 1044512 | 100.000 | 100.000  |

## HPLC chromatogram of compound 4b

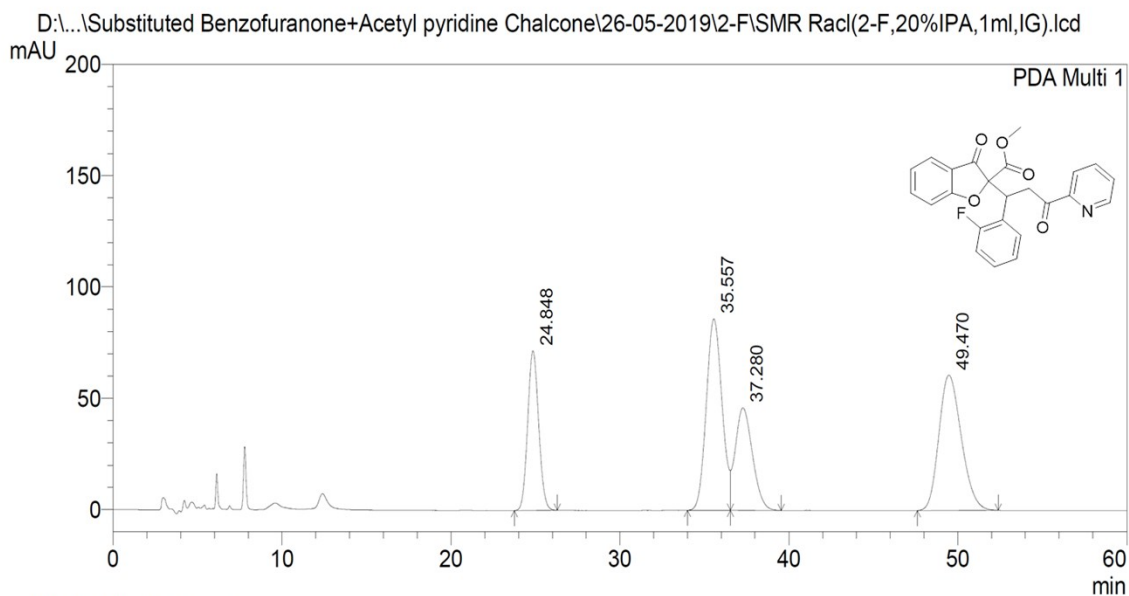

PeakTable

PDA Ch1 254nm 4nm

| Peak# | Ret. Time | Area     | Height | Area %  | Height % |
|-------|-----------|----------|--------|---------|----------|
| 1     | 24.848    | 3235030  | 71685  | 18.291  | 27.106   |
| 2     | 35.557    | 5581557  | 85917  | 31.559  | 32.487   |
| 3     | 37.280    | 3265303  | 46092  | 18.463  | 17.429   |
| 4     | 49.470    | 5604176  | 60768  | 31.687  | 22.978   |
| Total |           | 17686066 | 264462 | 100.000 | 100.000  |

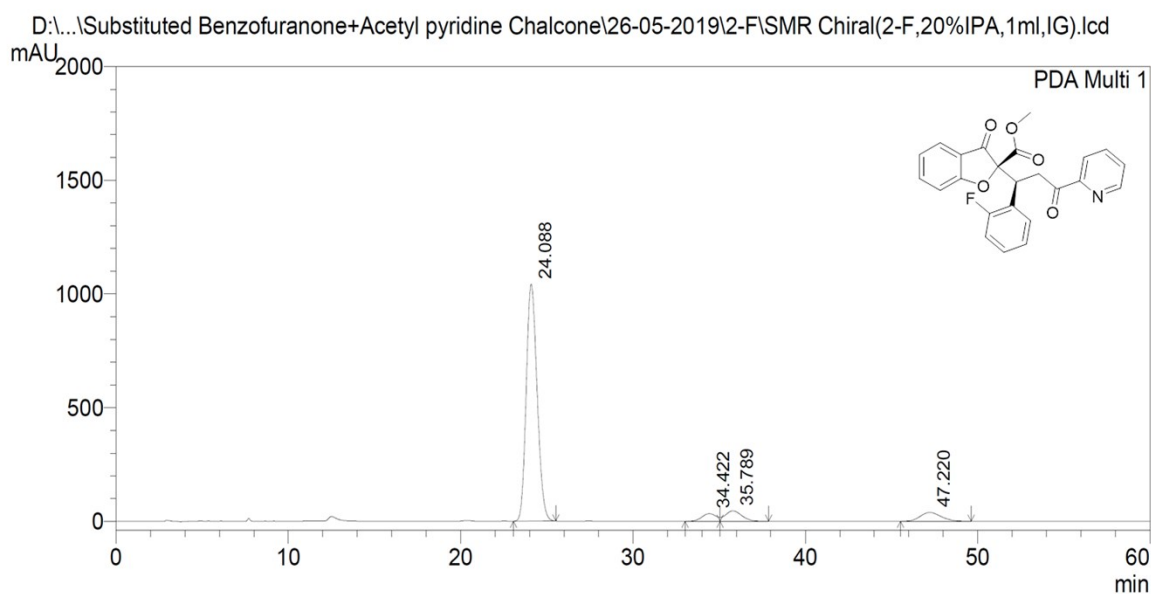

PeakTable

PDA Ch1 254nm 4nm

| Peak# | Ret. Time | Area     | Height  | Area %  | Height % |
|-------|-----------|----------|---------|---------|----------|
| 1     | 24.088    | 45747736 | 1042156 | 84.714  | 89.812   |
| 2     | 34.422    | 1969199  | 33625   | 3.646   | 2.898    |
| 3     | 35.789    | 3048321  | 45911   | 5.645   | 3.957    |
| 4     | 47.220    | 3237347  | 38685   | 5.995   | 3.334    |
| Total |           | 54002603 | 1160377 | 100.000 | 100.000  |

## HPLC chromatogram of compound 4c

D:\...\Substituted Benzofuranone+Acetyl pyridine Chalcone\26-05-2019\2-Br\SMR Rac(2-Br,10ipa,1ml,Adh).lcd

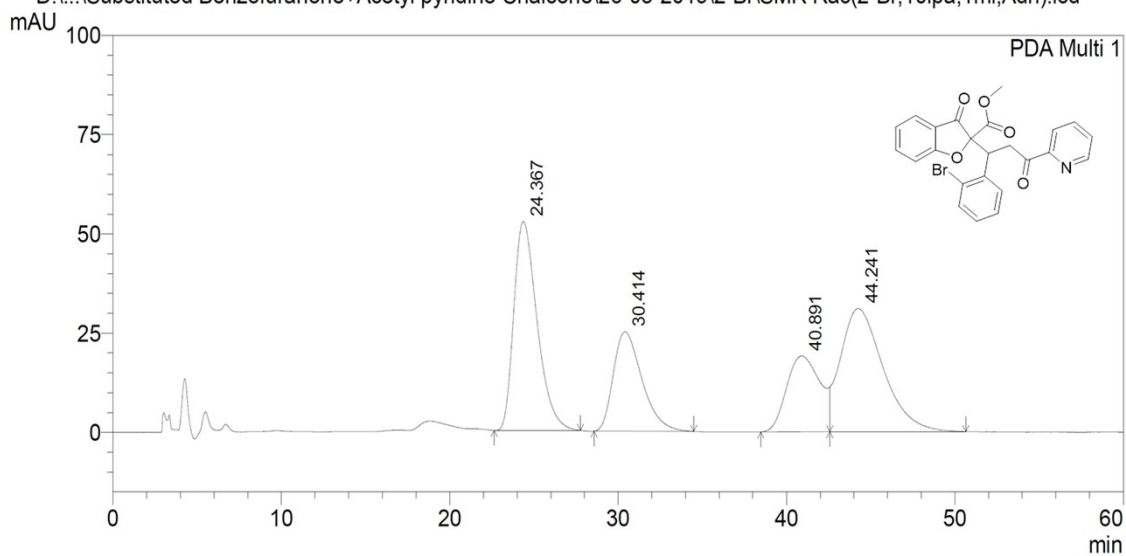

1 PDA Multi 1/254nm 4nm

PeakTable

PDA Ch1 254nm 4nm

| Peak# | Ret. Time | Area     | Height | Area %  | Height % |
|-------|-----------|----------|--------|---------|----------|
| 1     | 24.367    | 5065227  | 52607  | 31.384  | 41.165   |
| 2     | 30.414    | 2967442  | 25046  | 18.386  | 19.598   |
| 3     | 40.891    | 2656729  | 19121  | 16.461  | 14.962   |
| 4     | 44.241    | 5450156  | 31022  | 33.769  | 24.275   |
| Total |           | 16139554 | 127796 | 100.000 | 100.000  |

D:\...\Substituted Benzofuranone+Acetyl pyridine Chalcone\26-05-2019\2-Br\SMR Chiral(2-Br,10ipa,1ml,Adh)1.lcd

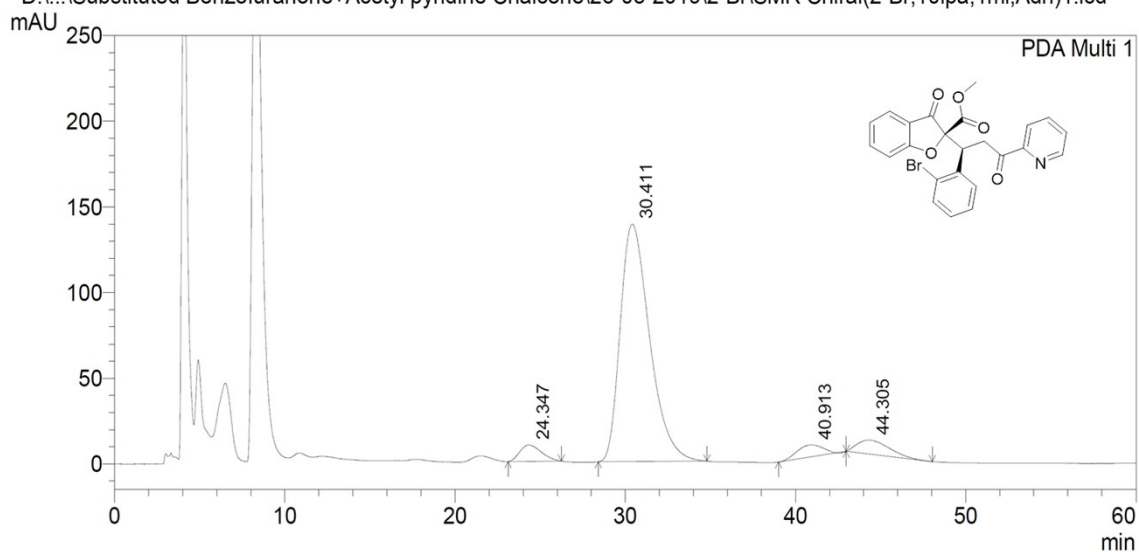

1 PDA Multi 1/254nm 4nm

PeakTable

PDA Ch1 254nm 4nm

| Peak# | Ret. Time | Area     | Height | Area %  | Height % |
|-------|-----------|----------|--------|---------|----------|
| 1     | 24.347    | 837168   | 9542   | 4.338   | 5.847    |
| 2     | 30.411    | 16653707 | 138578 | 86.300  | 84.914   |
| 3     | 40.913    | 734081   | 6985   | 3.804   | 4.280    |
| 4     | 44.305    | 1072474  | 8094   | 5.558   | 4.959    |
| Total |           | 19297431 | 163199 | 100.000 | 100.000  |

## HPLC chromatogram of compound 4d

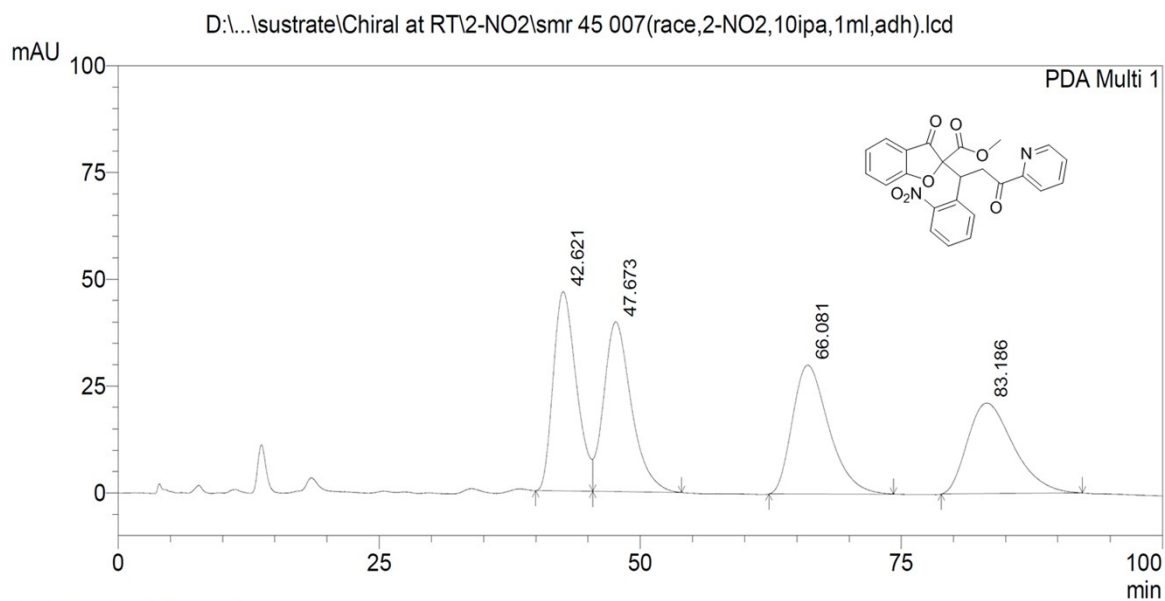

1 PDA Multi 1/254nm 4nm

PeakTable

PDA Ch1 254nm 4nm

| Peak# | Ret. Time | Area     | Height | Area %  | Height % |
|-------|-----------|----------|--------|---------|----------|
| 1     | 42.621    | 7215656  | 46687  | 25.412  | 33.861   |
| 2     | 47.673    | 7338669  | 39775  | 25.846  | 28.847   |
| 3     | 66.081    | 7328758  | 30179  | 25.811  | 21.887   |
| 4     | 83.186    | 6511115  | 21240  | 22.931  | 15.405   |
| Total |           | 28394198 | 137881 | 100.000 | 100.000  |

<Chromatogram>

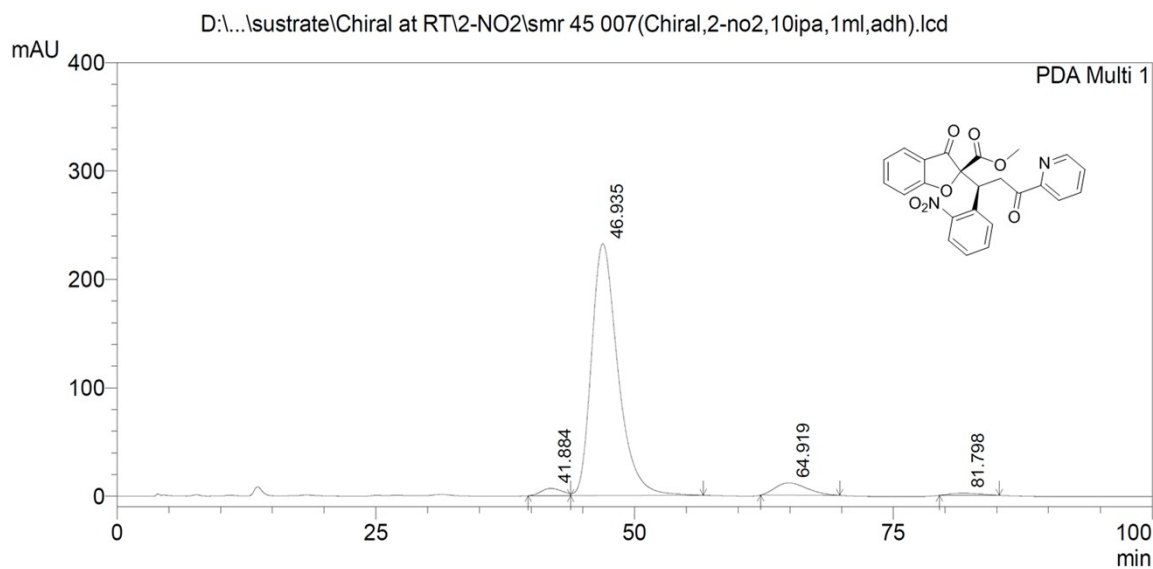

1 PDA Multi 1/254nm 4nm

PeakTable

PDA Ch1 254nm 4nm

| Peak# | Ret. Time | Area     | Height | Area %  | Height % |
|-------|-----------|----------|--------|---------|----------|
| 1     | 41.884    | 955105   | 6801   | 2.121   | 2.691    |
| 2     | 46.935    | 41239257 | 232485 | 91.588  | 92.004   |
| 3     | 64.919    | 2441808  | 11437  | 5.423   | 4.526    |
| 4     | 81.798    | 390609   | 1967   | 0.868   | 0.778    |
| Total |           | 45026778 | 252690 | 100.000 | 100.000  |

**HPLC chromatogram of compound 4e**

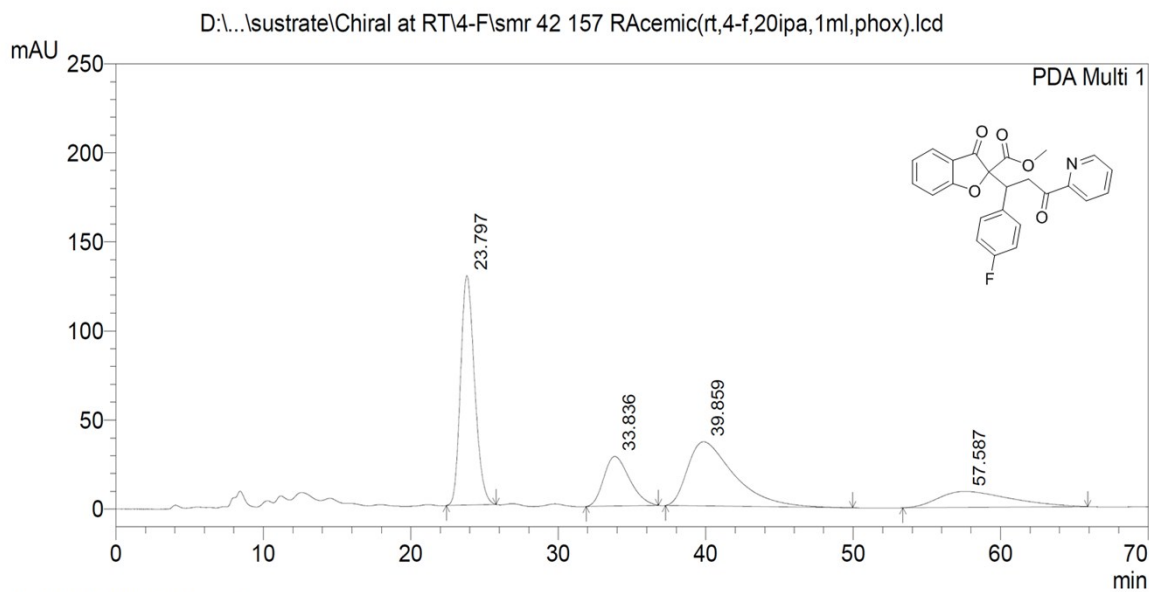

PeakTable

PDA Ch1 254nm 4nm

| Peak# | Ret. Time | Area     | Height | Area %  | Height % |
|-------|-----------|----------|--------|---------|----------|
| 1     | 23.797    | 8520318  | 128863 | 37.284  | 63.862   |
| 2     | 33.836    | 3377196  | 27848  | 14.778  | 13.801   |
| 3     | 39.859    | 7906498  | 36077  | 34.598  | 17.879   |
| 4     | 57.587    | 3048510  | 8996   | 13.340  | 4.458    |
| Total |           | 22852523 | 201783 | 100.000 | 100.000  |

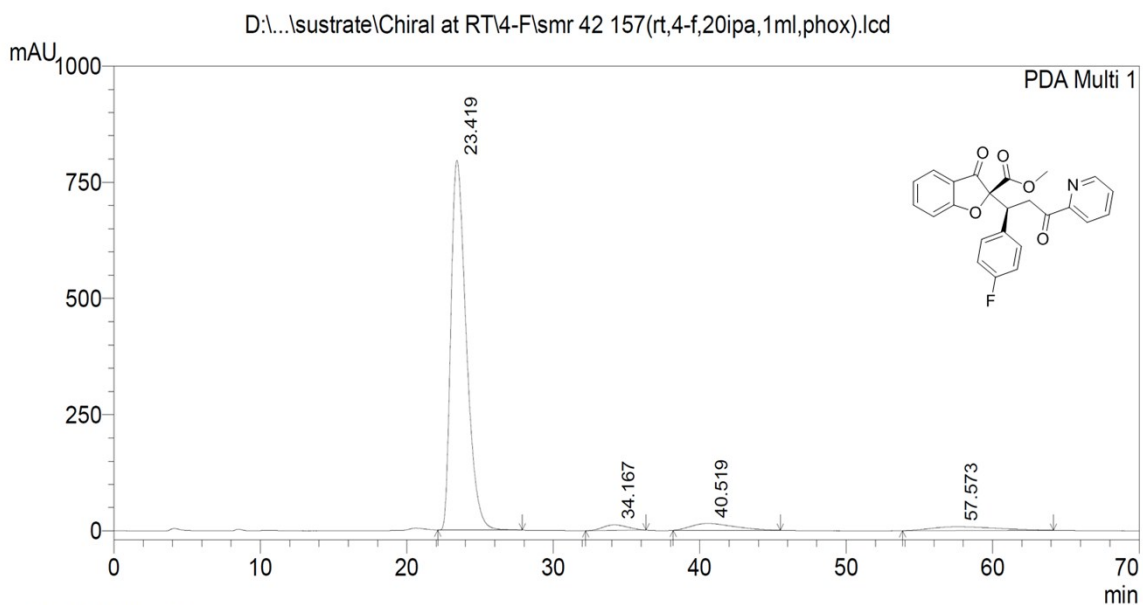

PeakTable

PDA Ch1 254nm 4nm

| Peak# | Ret. Time | Area     | Height | Area %  | Height % |
|-------|-----------|----------|--------|---------|----------|
| 1     | 23.419    | 58014796 | 795664 | 89.514  | 95.830   |
| 2     | 34.167    | 1389294  | 12054  | 2.144   | 1.452    |
| 3     | 40.519    | 2950606  | 14602  | 4.553   | 1.759    |
| 4     | 57.573    | 2455874  | 7968   | 3.789   | 0.960    |
| Total |           | 64810571 | 830288 | 100.000 | 100.000  |

## HPLC chromatogram of compound 4f

D:\...\Substituted Benzofuranone+Acetyl pyridine Chalcone\26-05-2019\4-Cl\SMR Rac(4-Cl,10ipa,0.5ml,ASH).lcd

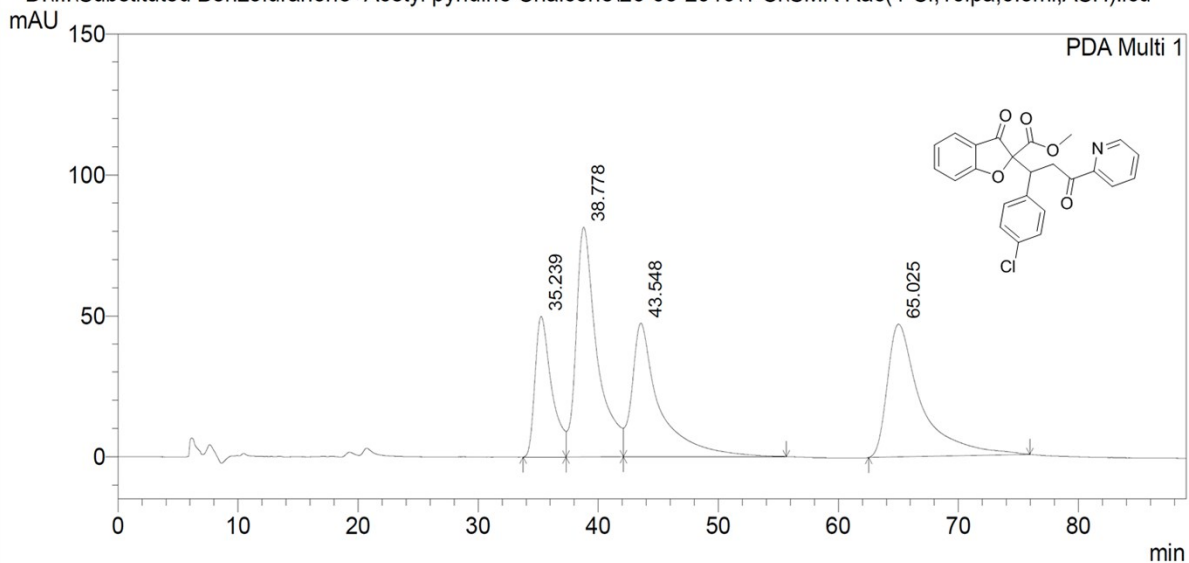

1 PDA Multi 1/254nm 4nm

PeakTable

PDA Ch1 254nm 4nm

| Peak# | Ret. Time | Area     | Height | Area %  | Height % |
|-------|-----------|----------|--------|---------|----------|
| 1     | 35.239    | 4803118  | 49856  | 15.212  | 22.069   |
| 2     | 38.778    | 9977936  | 81549  | 31.600  | 36.098   |
| 3     | 43.548    | 7567686  | 47438  | 23.967  | 20.999   |
| 4     | 65.025    | 9226679  | 47066  | 29.221  | 20.834   |
| Total |           | 31575419 | 225909 | 100.000 | 100.000  |

D:\...\Substituted Benzofuranone+Acetyl pyridine Chalcone\26-05-2019\4-Cl\SMR Chiral(4-Cl,10ipa,0.5ml,ASH).lcd

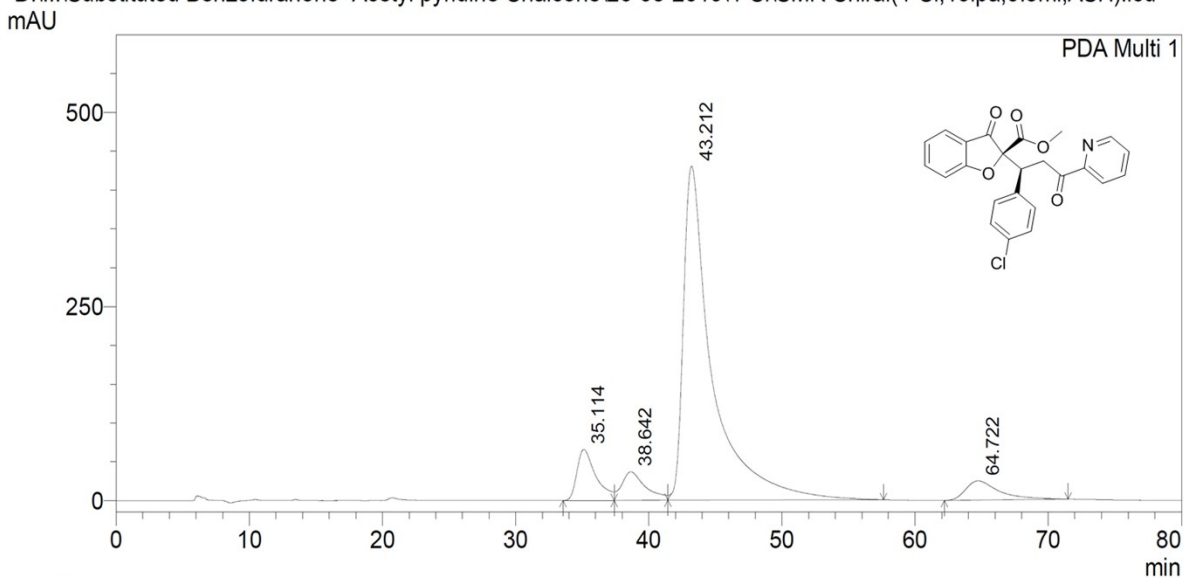

1 PDA Multi 1/254nm 4nm

PeakTable

PDA Ch1 254nm 4nm

| Peak# | Ret. Time | Area     | Height | Area %  | Height % |
|-------|-----------|----------|--------|---------|----------|
| 1     | 35.114    | 6481034  | 65694  | 8.099   | 11.780   |
| 2     | 38.642    | 4571404  | 36766  | 5.713   | 6.593    |
| 3     | 43.212    | 64604183 | 430391 | 80.736  | 77.174   |
| 4     | 64.722    | 4362903  | 24839  | 5.452   | 4.454    |
| Total |           | 80019524 | 557690 | 100.000 | 100.000  |

## HPLC chromatogram of compound 4g

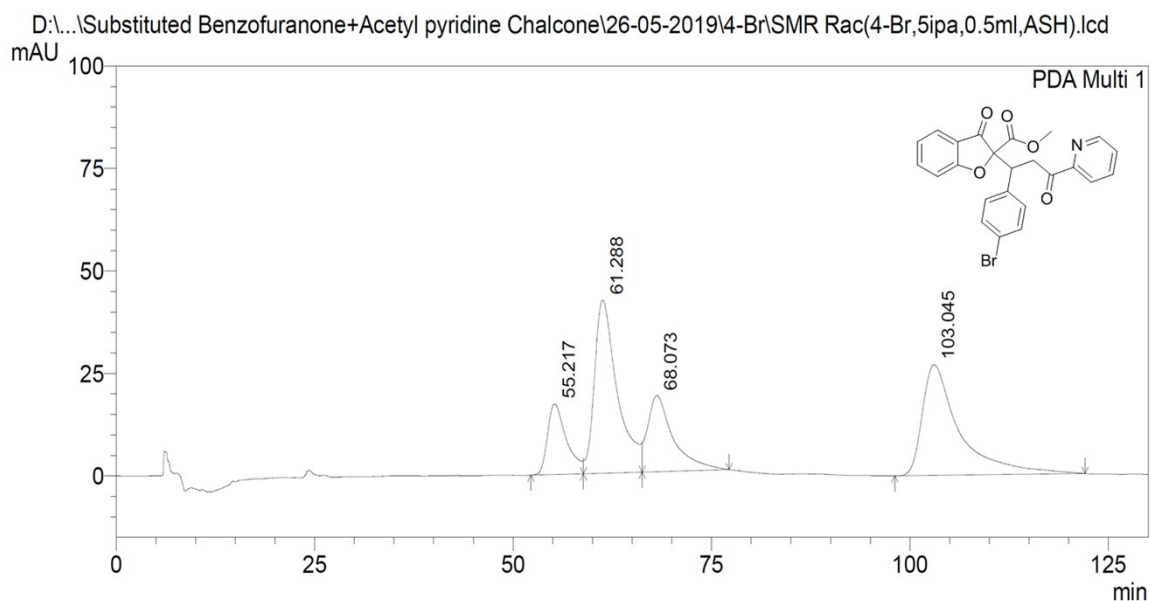

PeakTable

PDA Ch1 254nm 4nm

| Peak# | Ret. Time | Area     | Height | Area %  | Height % |
|-------|-----------|----------|--------|---------|----------|
| 1     | 55.217    | 2862155  | 17254  | 11.766  | 16.424   |
| 2     | 61.288    | 8494539  | 42255  | 34.921  | 40.223   |
| 3     | 68.073    | 4166865  | 18575  | 17.130  | 17.681   |
| 4     | 103.045   | 8801713  | 26969  | 36.183  | 25.672   |
| Total |           | 24325272 | 105053 | 100.000 | 100.000  |

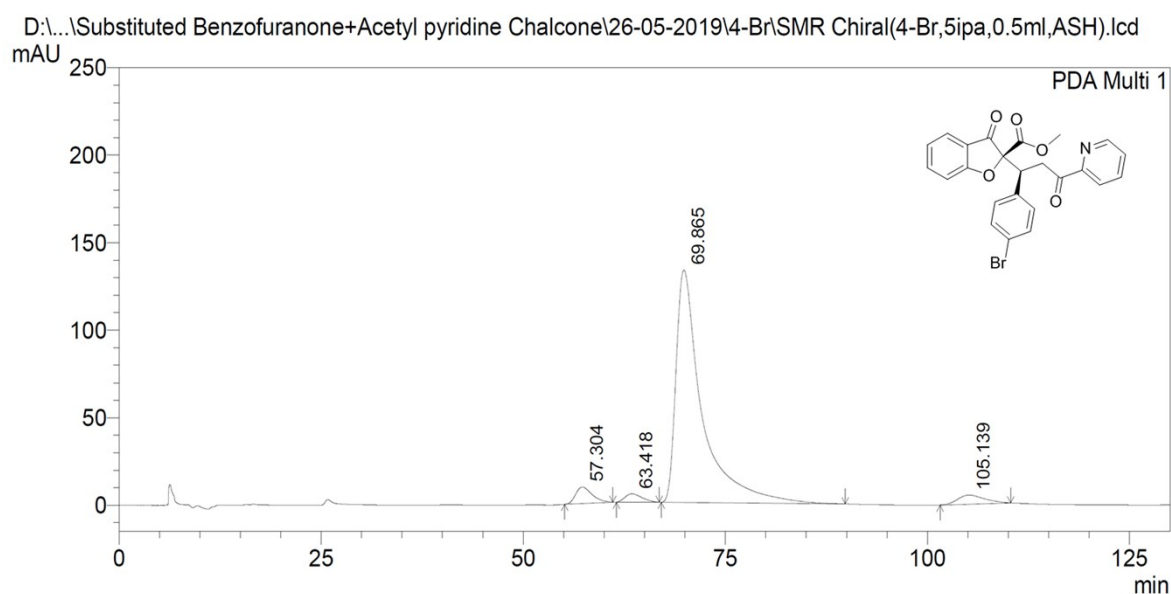

PeakTable

PDA Ch1 254nm 4nm

| Peak# | Ret. Time | Area     | Height | Area %  | Height % |
|-------|-----------|----------|--------|---------|----------|
| 1     | 57.304    | 1344575  | 9493   | 4.063   | 6.232    |
| 2     | 63.418    | 701059   | 4765   | 2.118   | 3.128    |
| 3     | 69.865    | 29842918 | 132886 | 90.171  | 87.230   |
| 4     | 105.139   | 1207358  | 5194   | 3.648   | 3.410    |
| Total |           | 33095911 | 152339 | 100.000 | 100.000  |

## HPLC chromatogram of compound 4h

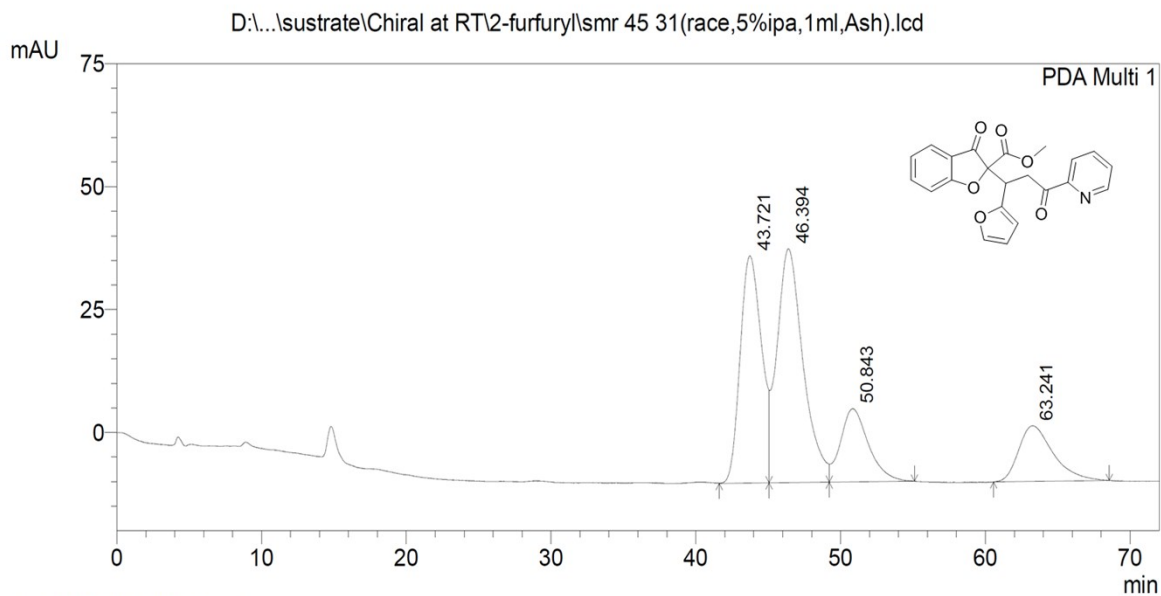

PeakTable

PDA Ch1 254nm 4nm

| Peak# | Ret. Time | Area     | Height | Area %  | Height % |
|-------|-----------|----------|--------|---------|----------|
| 1     | 43.721    | 4729480  | 46196  | 32.328  | 38.498   |
| 2     | 46.394    | 6006775  | 47555  | 41.059  | 39.631   |
| 3     | 50.843    | 2007316  | 14897  | 13.721  | 12.415   |
| 4     | 63.241    | 1886185  | 11347  | 12.893  | 9.456    |
| Total |           | 14629756 | 119995 | 100.000 | 100.000  |

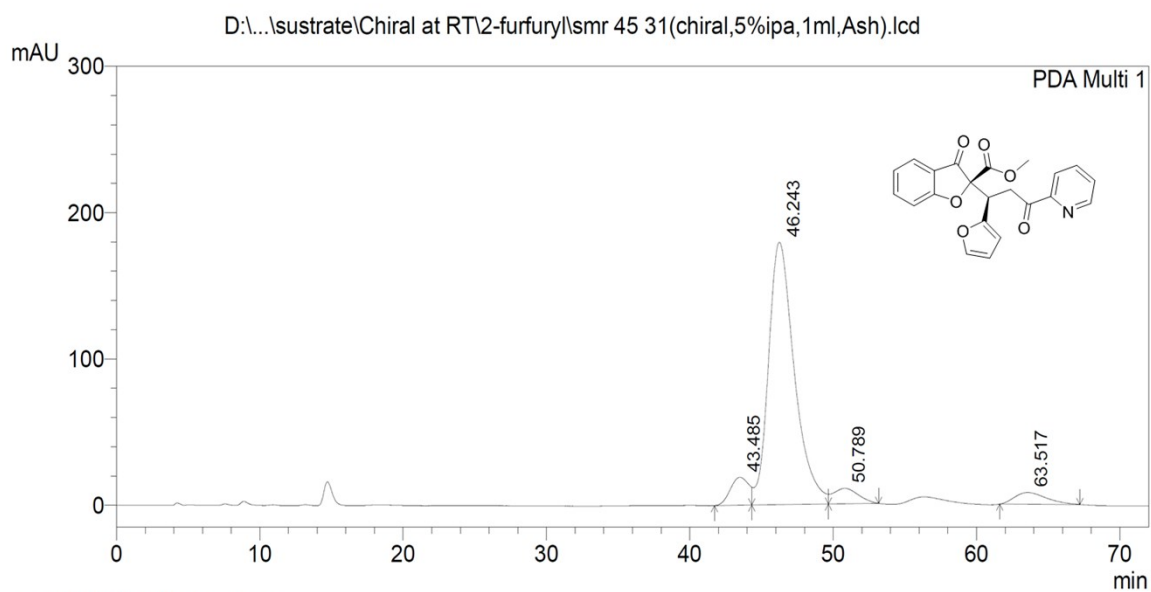

PeakTable

PDA Ch1 254nm 4nm

| Peak# | Ret. Time | Area     | Height | Area %  | Height % |
|-------|-----------|----------|--------|---------|----------|
| 1     | 43.485    | 1689837  | 19101  | 6.301   | 8.800    |
| 2     | 46.243    | 22598009 | 179316 | 84.268  | 82.618   |
| 3     | 50.789    | 1288714  | 10574  | 4.806   | 4.872    |
| 4     | 63.517    | 1240258  | 8052   | 4.625   | 3.710    |
| Total |           | 26816818 | 217043 | 100.000 | 100.000  |

## HPLC chromatogram of compound 4i

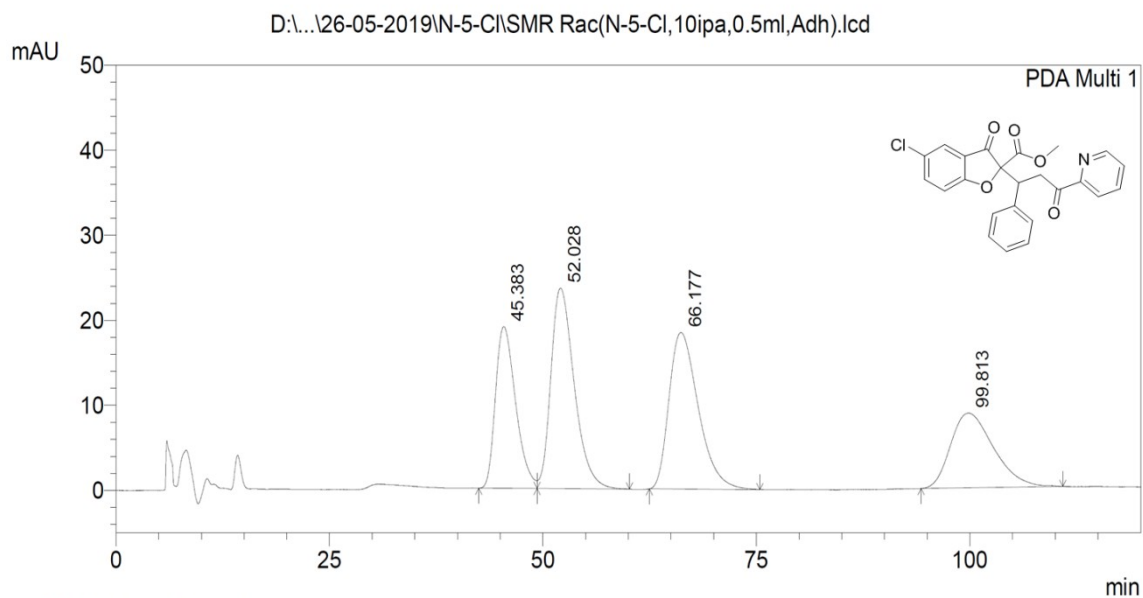

1 PDA Multi 1/254nm 4nm

PeakTable

PDA Ch1 254nm 4nm

| Peak# | Ret. Time | Area     | Height | Area %  | Height % |
|-------|-----------|----------|--------|---------|----------|
| 1     | 45.383    | 3123177  | 19004  | 20.697  | 27.228   |
| 2     | 52.028    | 4489588  | 23574  | 29.752  | 33.777   |
| 3     | 66.177    | 4400405  | 18425  | 29.161  | 26.399   |
| 4     | 99.813    | 3077102  | 8792   | 20.391  | 12.596   |
| Total |           | 15090272 | 69794  | 100.000 | 100.000  |

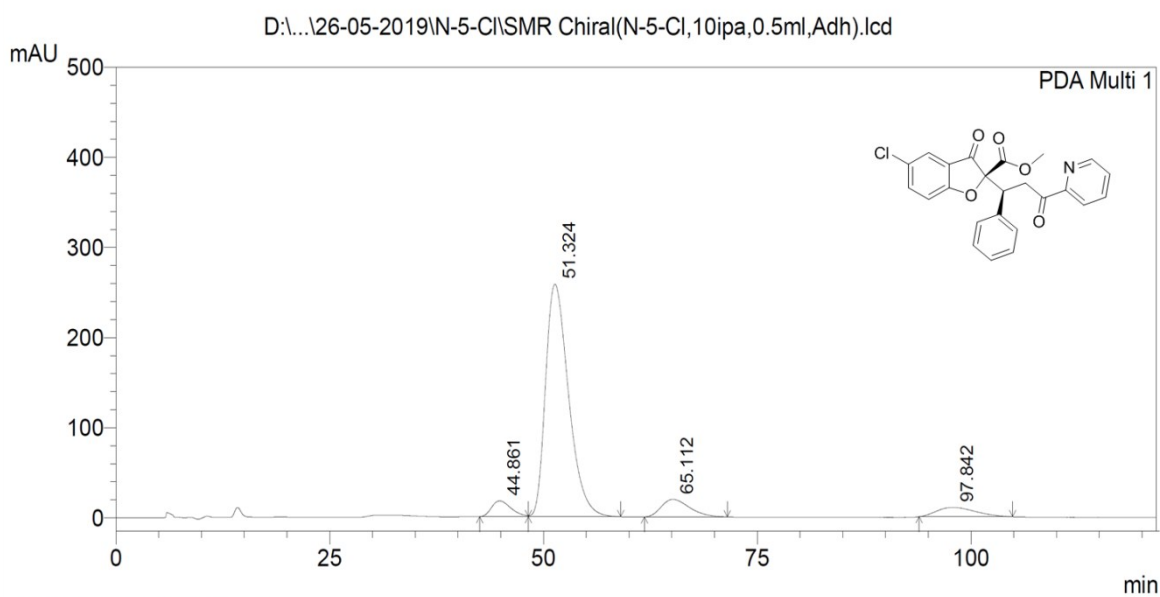

1 PDA Multi 1/254nm 4nm

PeakTable

PDA Ch1 254nm 4nm

| Peak# | Ret. Time | Area     | Height | Area %  | Height % |
|-------|-----------|----------|--------|---------|----------|
| 1     | 44.861    | 2739600  | 17458  | 4.657   | 5.721    |
| 2     | 51.324    | 48392874 | 257960 | 82.258  | 84.537   |
| 3     | 65.112    | 4465456  | 19439  | 7.590   | 6.370    |
| 4     | 97.842    | 3232720  | 10287  | 5.495   | 3.371    |
| Total |           | 58830650 | 305142 | 100.000 | 100.000  |

**HPLC chromatogram of compound 4i (After single recrystallization)**

D:\...\Substituted Benzofuranone+Acetyl pyridine Chalcone\18-06-2019\SMR RAC(N-5-CL,10IPA,0.5ML,ADH).lcd  
mAU

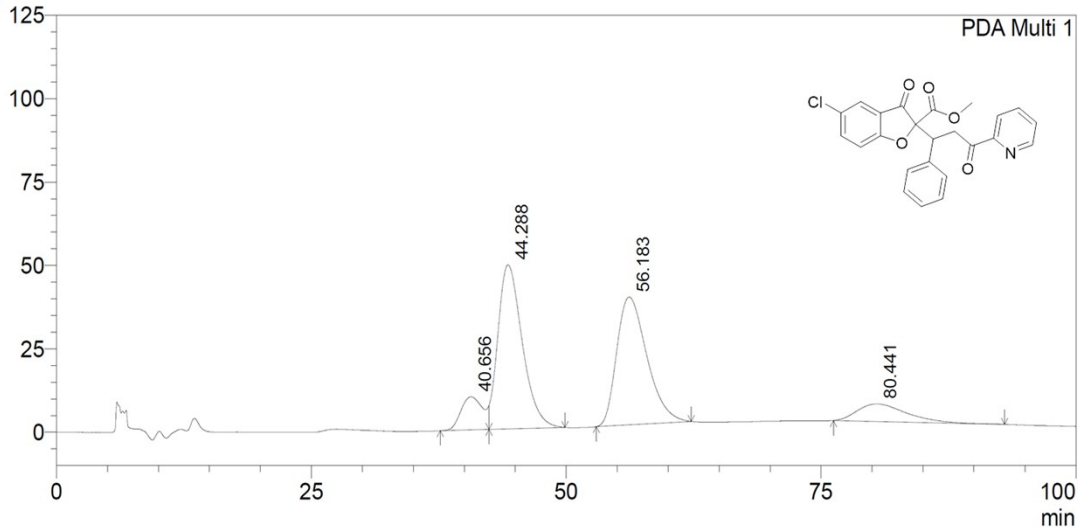

1 PDA Multi 1/254nm 4nm

PeakTable

PDA Ch1 254nm 4nm

| Peak# | Ret. Time | Area     | Height | Area %  | Height % |
|-------|-----------|----------|--------|---------|----------|
| 1     | 40.656    | 1498664  | 9931   | 7.747   | 9.669    |
| 2     | 44.288    | 8180901  | 49200  | 42.291  | 47.899   |
| 3     | 56.183    | 7898459  | 38316  | 40.831  | 37.303   |
| 4     | 80.441    | 1766250  | 5269   | 9.131   | 5.130    |
| Total |           | 19344274 | 102716 | 100.000 | 100.000  |

D:\...\18-06-2019\SMR CHIRAL(N-5-CL,10IPA,0.5ML,ADH).lcd

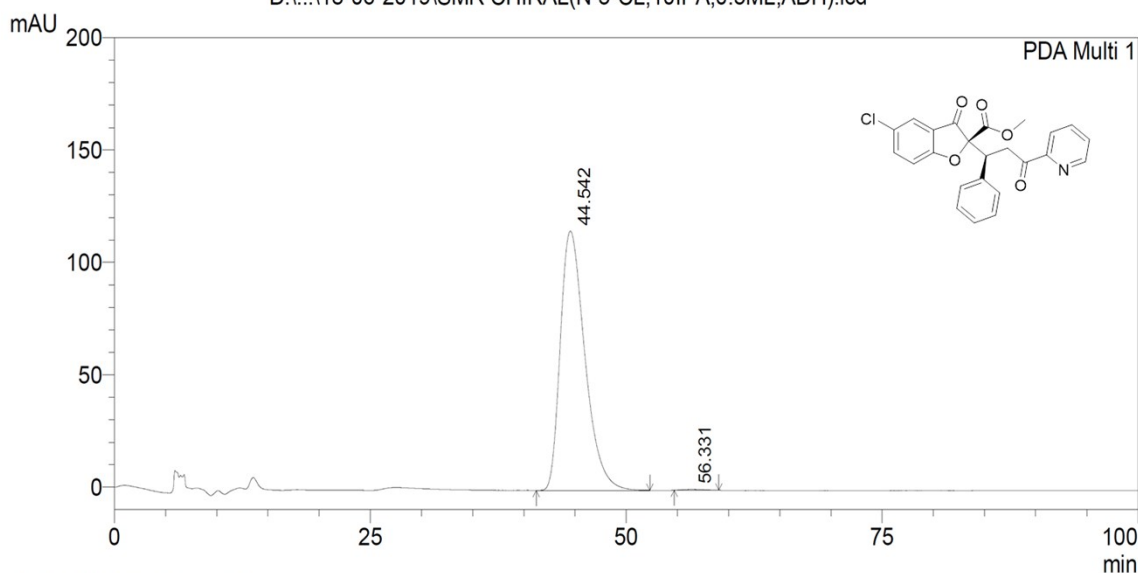

1 PDA Multi 1/254nm 4nm

PeakTable

PDA Ch1 254nm 4nm

| Peak# | Ret. Time | Area     | Height | Area %  | Height % |
|-------|-----------|----------|--------|---------|----------|
| 1     | 44.542    | 19252288 | 115330 | 99.681  | 99.629   |
| 2     | 56.331    | 61690    | 429    | 0.319   | 0.371    |
| Total |           | 19313978 | 115760 | 100.000 | 100.000  |

## HPLC chromatogram of compound 4j (Major Diastereomer)

D:\...\Substituted Benzofuranone+Acetyl pyridine Chalcone\26-05-2019\N-5-Br\SMR Rac(5-Br,10ipa,0.5ml,ASH).lcd

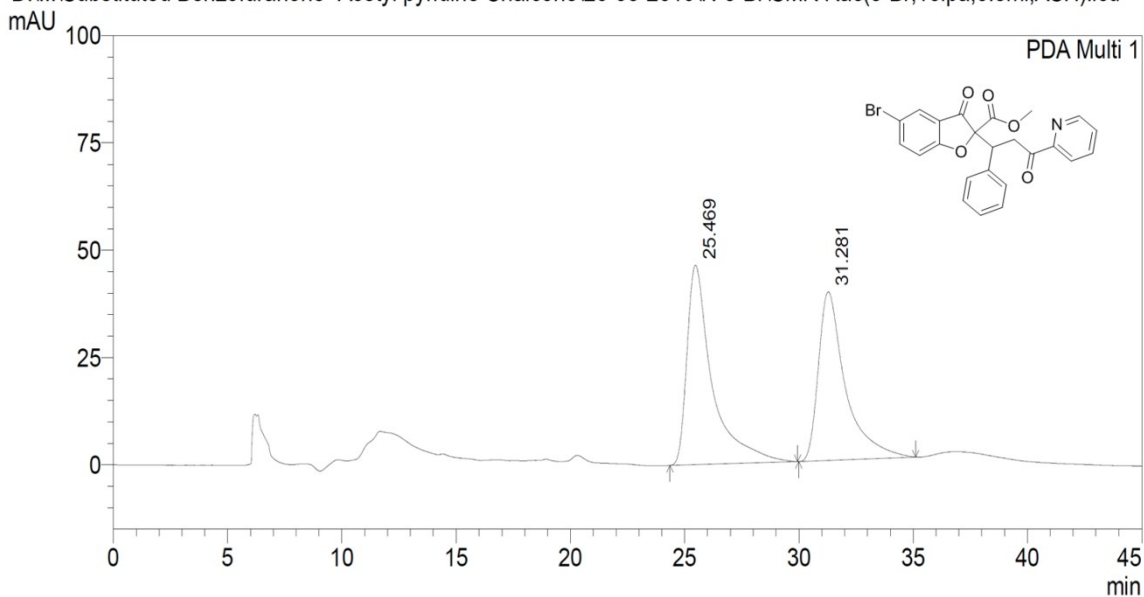

1 PDA Multi 1/254nm 4nm

PeakTable

PDA Ch1 254nm 4nm

| Peak# | Ret. Time | Area    | Height | Area %  | Height % |
|-------|-----------|---------|--------|---------|----------|
| 1     | 25.469    | 3574689 | 46475  | 52.480  | 54.184   |
| 2     | 31.281    | 3236778 | 39297  | 47.520  | 45.816   |
| Total |           | 6811468 | 85772  | 100.000 | 100.000  |

D:\...\26-05-2019\N-5-Br\SMR Chiral(5-Br,10ipa,0.5ml,ASH)dia1.lcd

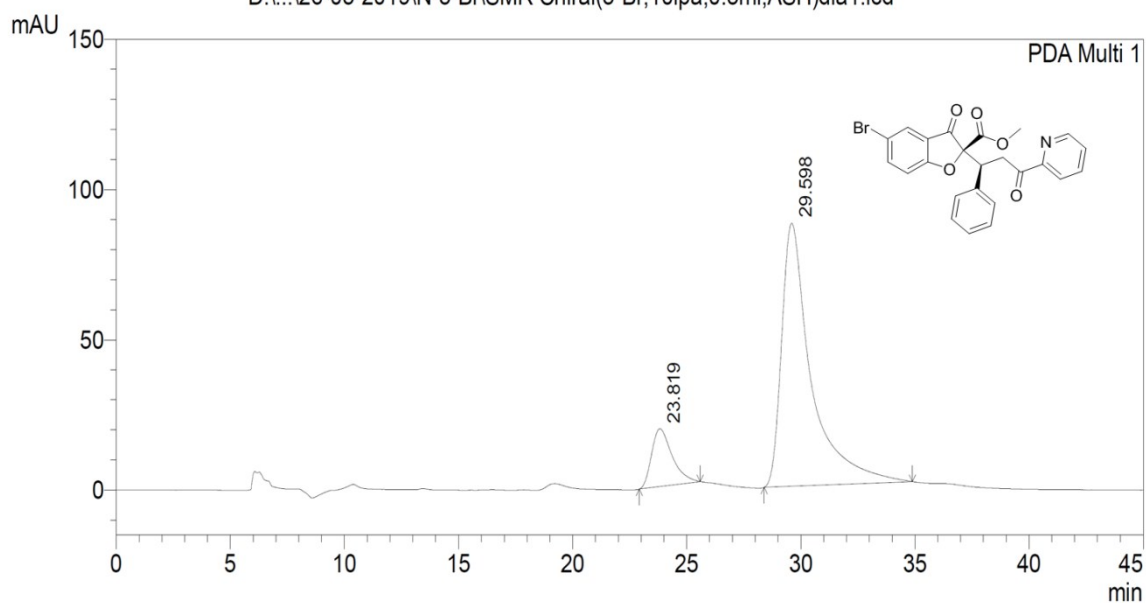

1 PDA Multi 1/254nm 4nm

PeakTable

PDA Ch1 254nm 4nm

| Peak# | Ret. Time | Area    | Height | Area %  | Height % |
|-------|-----------|---------|--------|---------|----------|
| 1     | 23.819    | 1205631 | 19220  | 13.252  | 18.005   |
| 2     | 29.598    | 7891864 | 87526  | 86.748  | 81.995   |
| Total |           | 9097495 | 106746 | 100.000 | 100.000  |

## HPLC chromatogram of compound 4j (Minor Diastereomer)

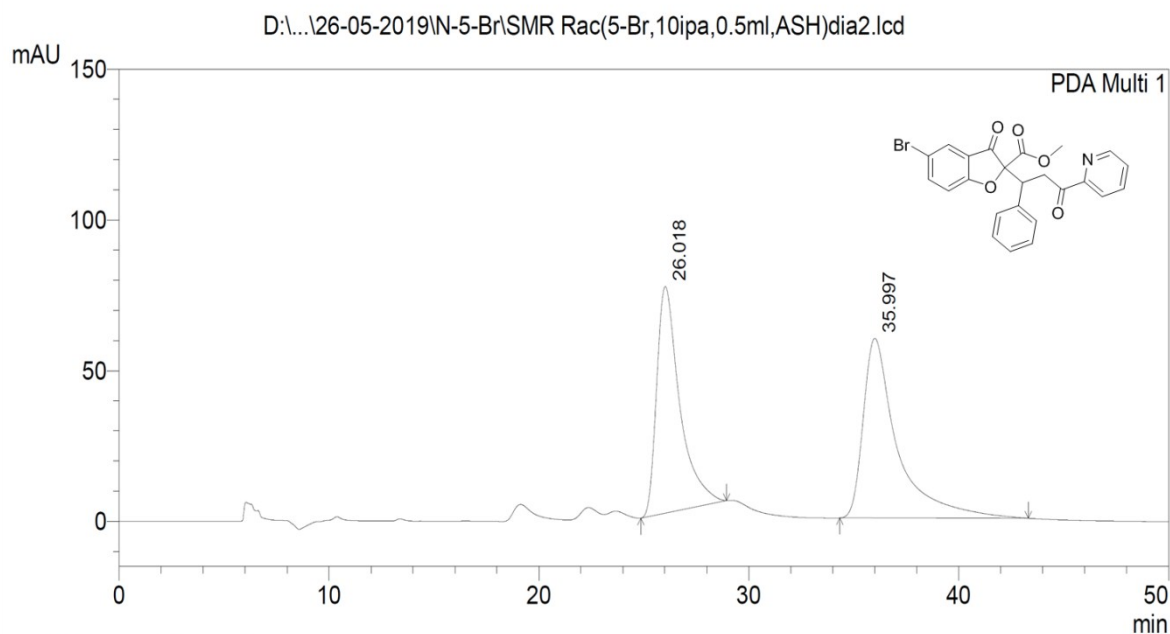

1 PDA Multi 1/254nm 4nm

PeakTable

PDA Ch1 254nm 4nm

| Peak# | Ret. Time | Area     | Height | Area %  | Height % |
|-------|-----------|----------|--------|---------|----------|
| 1     | 26.018    | 5752780  | 75231  | 45.978  | 55.801   |
| 2     | 35.997    | 6759265  | 59589  | 54.022  | 44.199   |
| Total |           | 12512045 | 134820 | 100.000 | 100.000  |

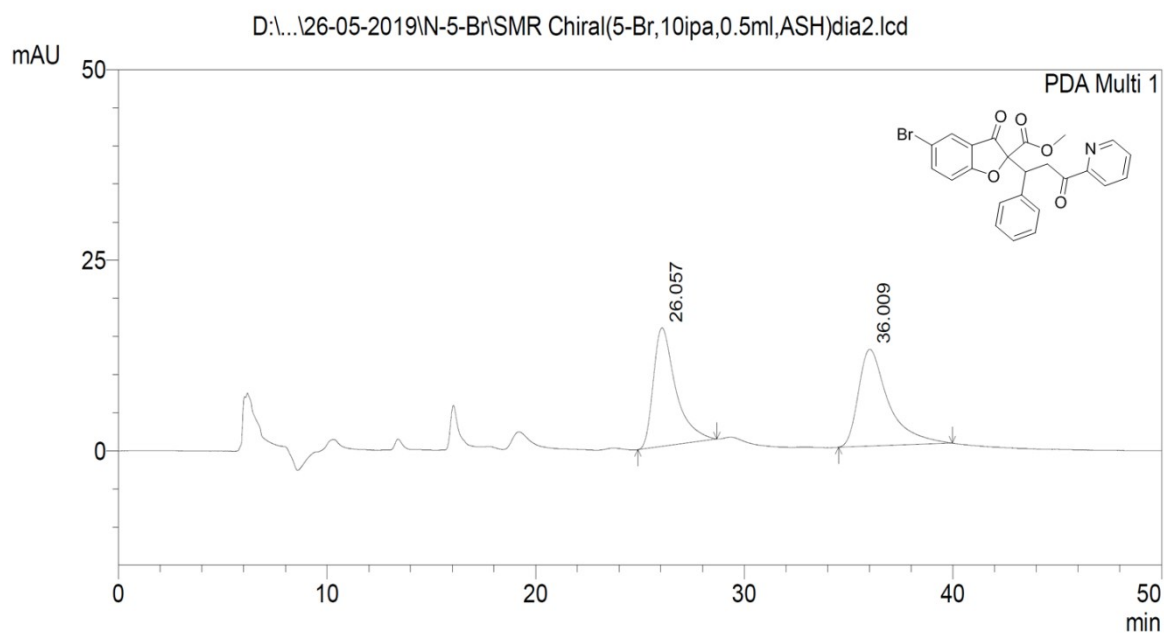

1 PDA Multi 1/254nm 4nm

PeakTable

PDA Ch1 254nm 4nm

| Peak# | Ret. Time | Area    | Height | Area %  | Height % |
|-------|-----------|---------|--------|---------|----------|
| 1     | 26.057    | 1165873 | 15566  | 47.798  | 55.066   |
| 2     | 36.009    | 1273303 | 12702  | 52.202  | 44.934   |
| Total |           | 2439177 | 28268  | 100.000 | 100.000  |

## HPLC chromatogram of compound 4k(Major Diastereomer)

D:\...\Substituted Benzofuranone+Acetyl pyridine Chalcone\26-05-2019\N-5-I\SMR Rac(N-5-I,10ipa,1ml,Ash)dia1.lcd  
mAU

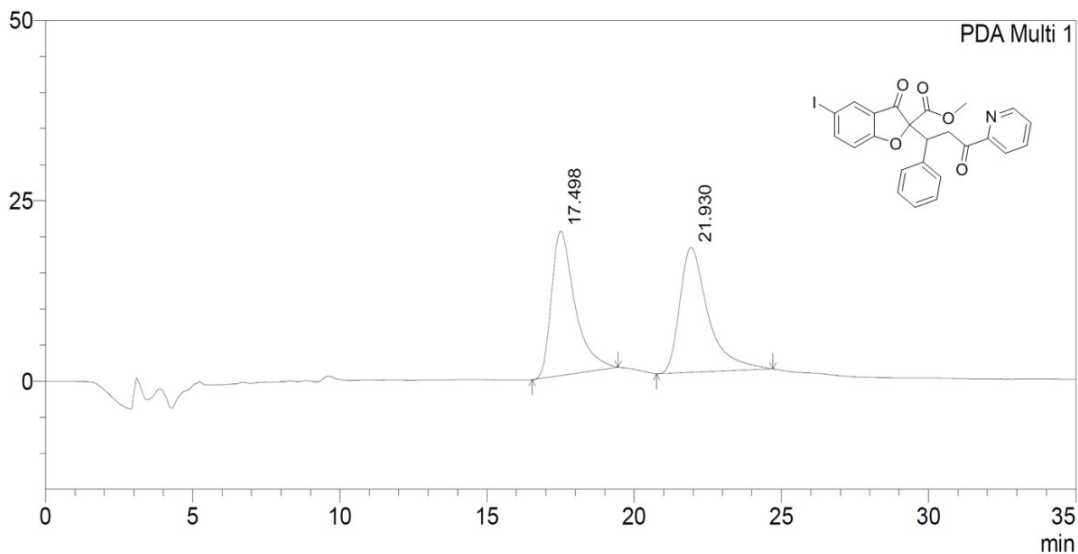

1 PDA Multi 1/254nm 4nm

PeakTable

PDA Ch1 254nm 4nm

| Peak# | Ret. Time | Area    | Height | Area %  | Height % |
|-------|-----------|---------|--------|---------|----------|
| 1     | 17.498    | 1116097 | 20032  | 48.877  | 53.657   |
| 2     | 21.930    | 1167381 | 17302  | 51.123  | 46.343   |
| Total |           | 2283478 | 37334  | 100.000 | 100.000  |

D:\...\26-05-2019\N-5-I\Dia 1\SMR Chiral(N-5-I,10ipa,1ml,Ash)dia1.lcd

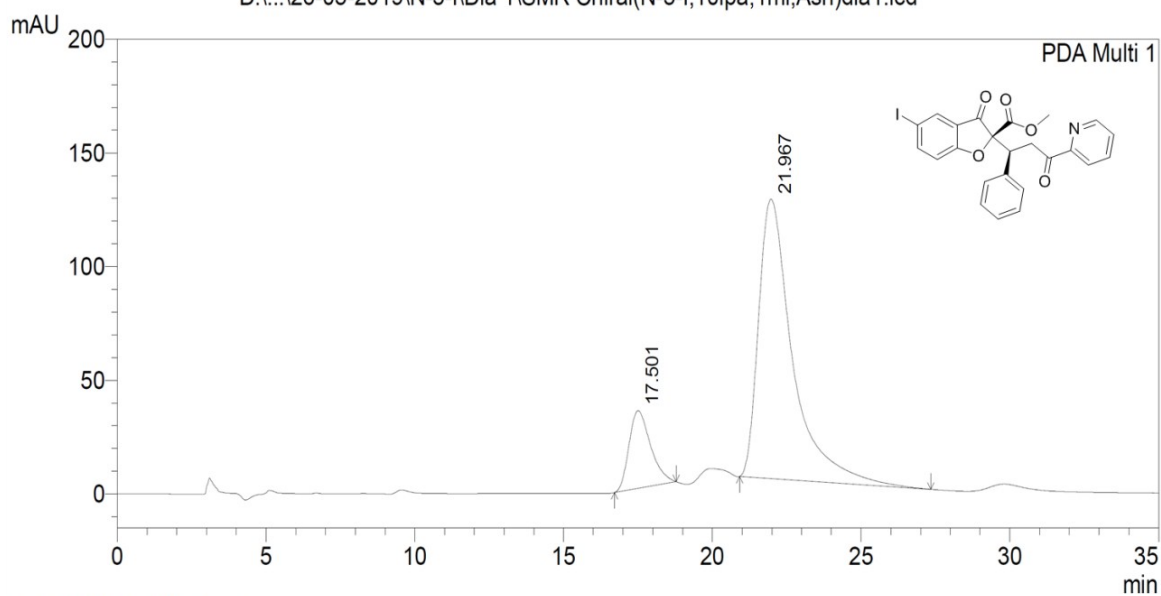

1 PDA Multi 1/254nm 4nm

PeakTable

PDA Ch1 254nm 4nm

| Peak# | Ret. Time | Area     | Height | Area %  | Height % |
|-------|-----------|----------|--------|---------|----------|
| 1     | 17.501    | 1728095  | 34172  | 15.005  | 21.754   |
| 2     | 21.967    | 9788756  | 122908 | 84.995  | 78.246   |
| Total |           | 11516851 | 157080 | 100.000 | 100.000  |

## HPLC chromatogram of compound 4k(Minor Diastereomer)

D:\...\Substituted Benzofuranone+Acetyl pyridine Chalcone\26-05-2019\N-5-I-SMR Rac(N-5-I,10ipa,1ml,Ash)dia2.lcd

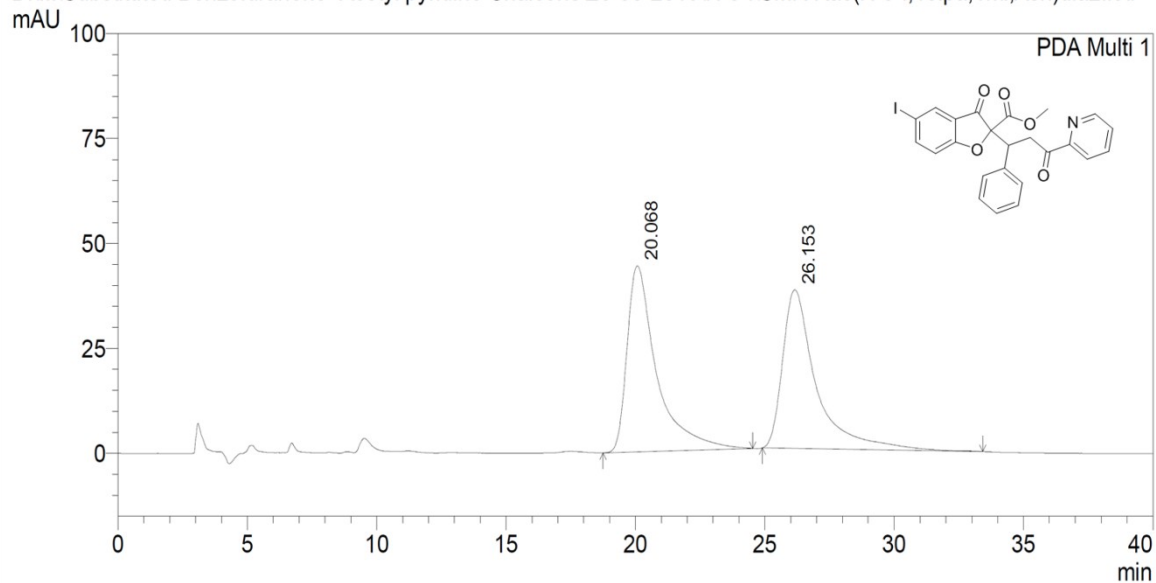

1 PDA Multi 1/254nm 4nm

PeakTable

PDA Ch1 254nm 4nm

| Peak# | Ret. Time | Area    | Height | Area %  | Height % |
|-------|-----------|---------|--------|---------|----------|
| 1     | 20.068    | 3527270 | 44315  | 50.751  | 53.951   |
| 2     | 26.153    | 3422942 | 37825  | 49.249  | 46.049   |
| Total |           | 6950212 | 82140  | 100.000 | 100.000  |

D:\...\26-05-2019\N-5-I-SMR Chiral(N-5-I,10ipa,1ml,Ash)dia2.lcd

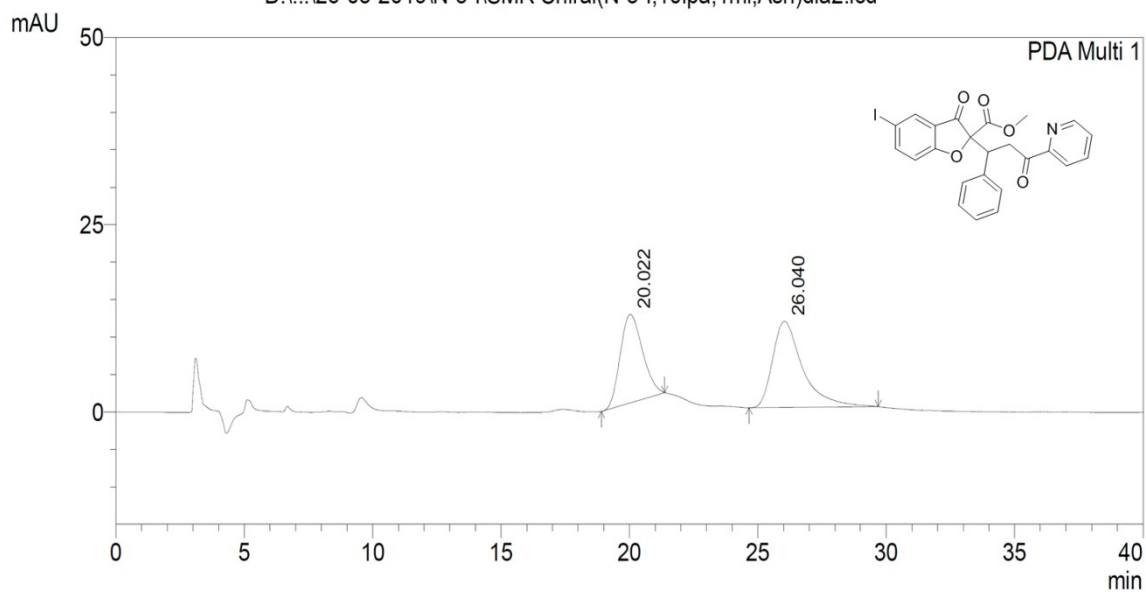

1 PDA Multi 1/254nm 4nm

PeakTable

PDA Ch1 254nm 4nm

| Peak# | Ret. Time | Area    | Height | Area %  | Height % |
|-------|-----------|---------|--------|---------|----------|
| 1     | 20.022    | 713217  | 11816  | 43.188  | 50.643   |
| 2     | 26.040    | 938222  | 11516  | 56.812  | 49.357   |
| Total |           | 1651439 | 23331  | 100.000 | 100.000  |

## HPLC chromatogram of compound 4l

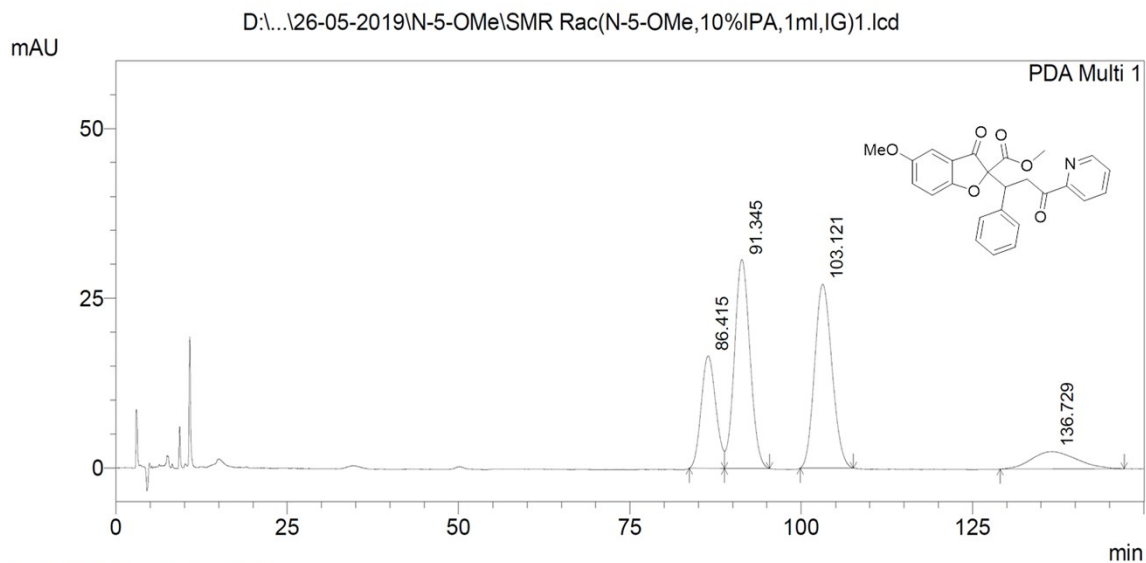

1 PDA Multi 1/254nm 4nm

PeakTable

PDA Ch1 254nm 4nm

| Peak# | Ret. Time | Area     | Height | Area %  | Height % |
|-------|-----------|----------|--------|---------|----------|
| 1     | 86.415    | 2455154  | 16581  | 18.546  | 21.532   |
| 2     | 91.345    | 4851457  | 30770  | 36.648  | 39.957   |
| 3     | 103.121   | 4778773  | 27113  | 36.099  | 35.208   |
| 4     | 136.729   | 1152747  | 2544   | 8.708   | 3.303    |
| Total |           | 13238130 | 77008  | 100.000 | 100.000  |

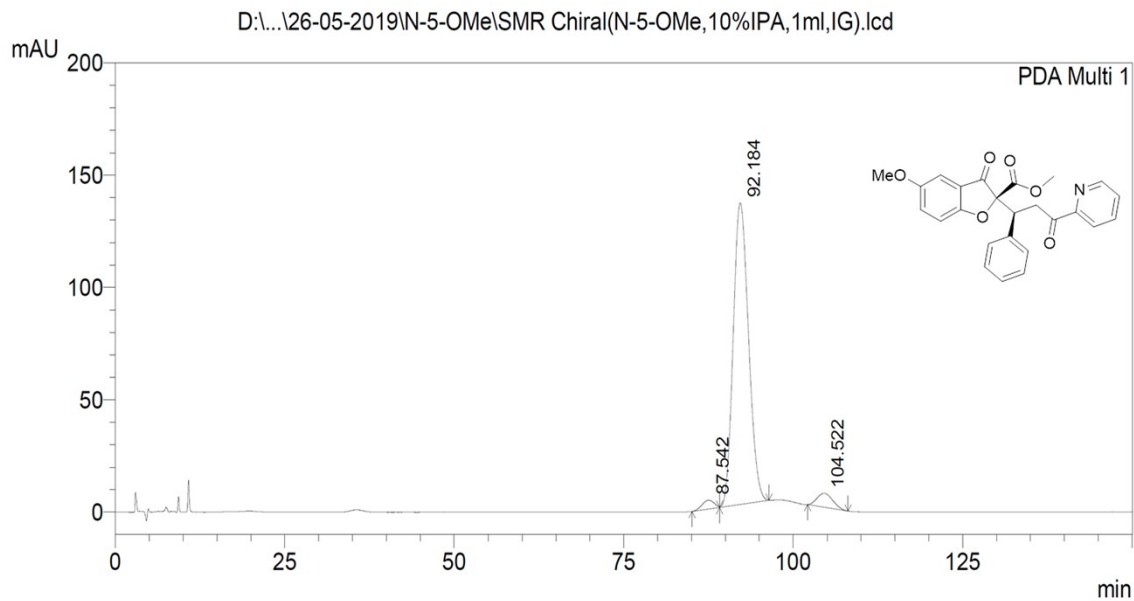

1 PDA Multi 1/254nm 4nm

PeakTable

PDA Ch1 254nm 4nm

| Peak# | Ret. Time | Area     | Height | Area %  | Height % |
|-------|-----------|----------|--------|---------|----------|
| 1     | 87.542    | 483755   | 3954   | 2.146   | 2.737    |
| 2     | 92.184    | 21056680 | 134304 | 93.394  | 92.965   |
| 3     | 104.522   | 1005532  | 6210   | 4.460   | 4.298    |
| Total |           | 22545967 | 144468 | 100.000 | 100.000  |

## HPLC chromatogram of compound 4m

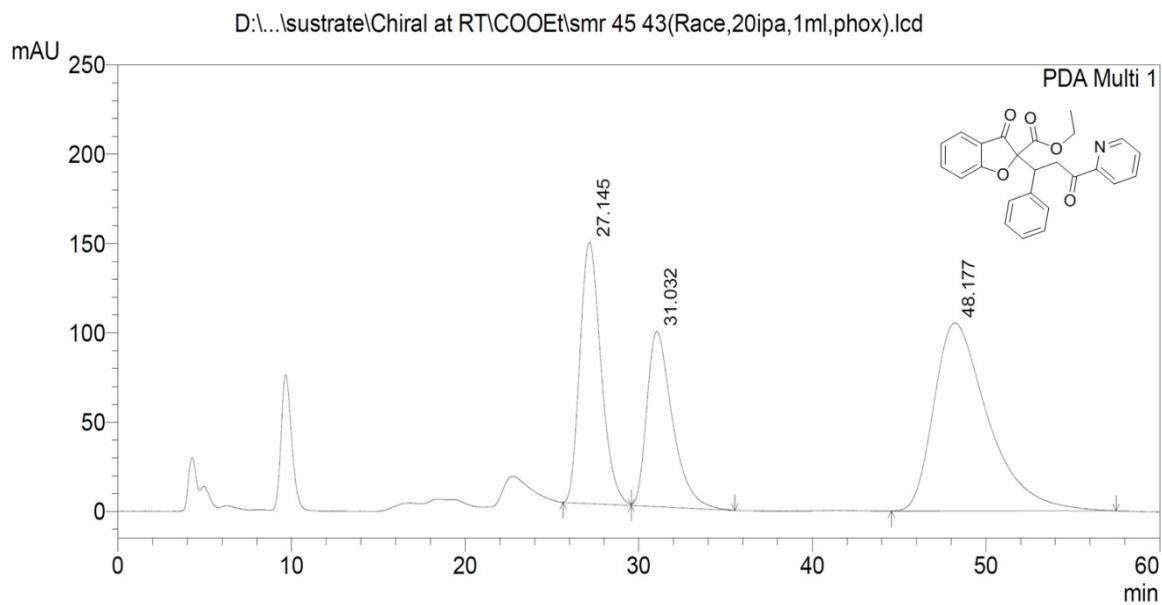

PeakTable

PDA Ch1 210nm 4nm

| Peak# | Ret. Time | Area     | Height | Area %  | Height % |
|-------|-----------|----------|--------|---------|----------|
| 1     | 27.145    | 12403705 | 146237 | 27.371  | 41.825   |
| 2     | 31.032    | 10042460 | 98104  | 22.160  | 28.058   |
| 3     | 48.177    | 22871029 | 105302 | 50.469  | 30.117   |
| Total |           | 45317194 | 349642 | 100.000 | 100.000  |

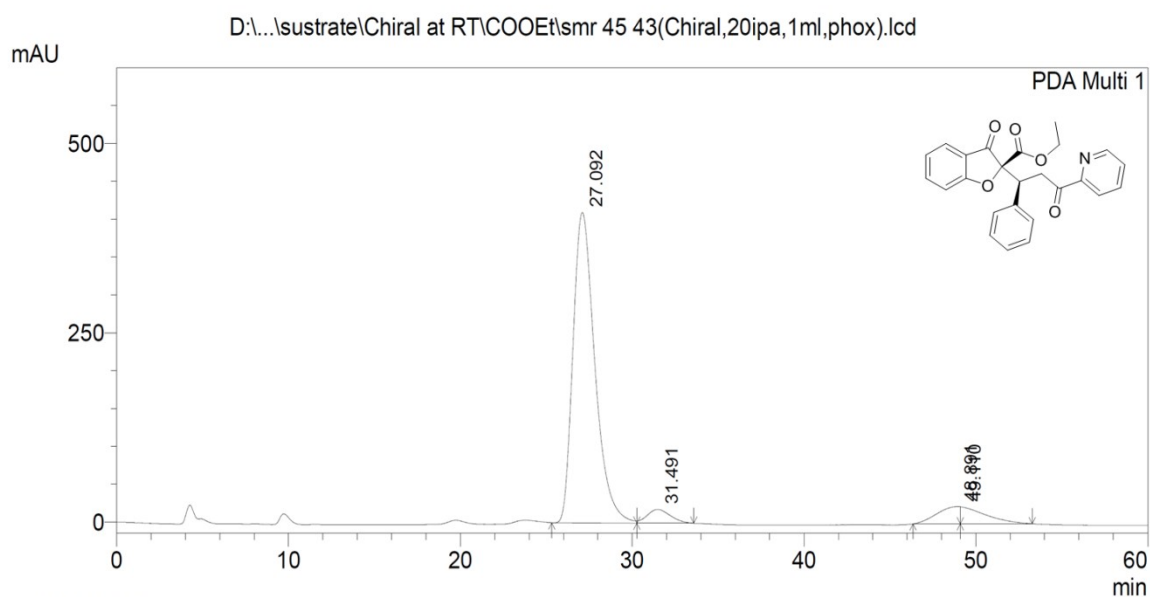

PeakTable

PDA Ch1 210nm 4nm

| Peak# | Ret. Time | Area     | Height | Area %  | Height % |
|-------|-----------|----------|--------|---------|----------|
| 1     | 27.092    | 36244800 | 410095 | 85.696  | 86.625   |
| 2     | 31.491    | 1695956  | 18101  | 4.010   | 3.824    |
| 3     | 48.891    | 2083272  | 22758  | 4.926   | 4.807    |
| 4     | 49.110    | 2270385  | 22462  | 5.368   | 4.745    |
| Total |           | 42294412 | 473416 | 100.000 | 100.000  |

## HPLC chromatogram of compound 4n

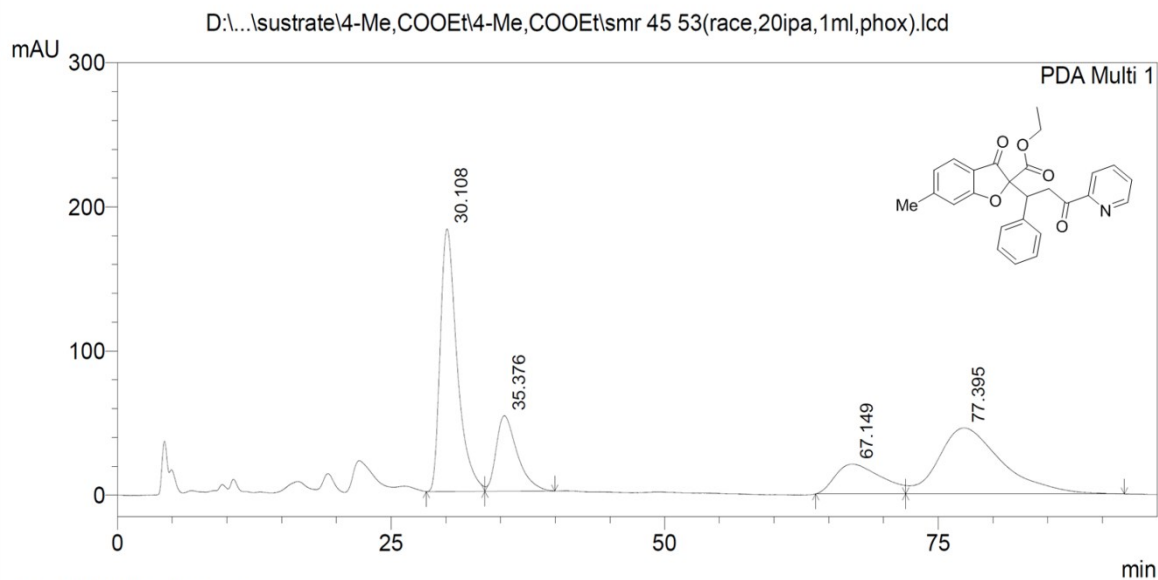

1 PDA Multi 1/210nm 4nm

PeakTable

| Peak# | Ret. Time | Area     | Height | Area %  | Height % |
|-------|-----------|----------|--------|---------|----------|
| 1     | 30.108    | 19555171 | 182082 | 38.327  | 60.525   |
| 2     | 35.376    | 7032233  | 52331  | 13.783  | 17.395   |
| 3     | 67.149    | 5993492  | 20662  | 11.747  | 6.868    |
| 4     | 77.395    | 18440367 | 45761  | 36.143  | 15.211   |
| Total |           | 51021263 | 300836 | 100.000 | 100.000  |

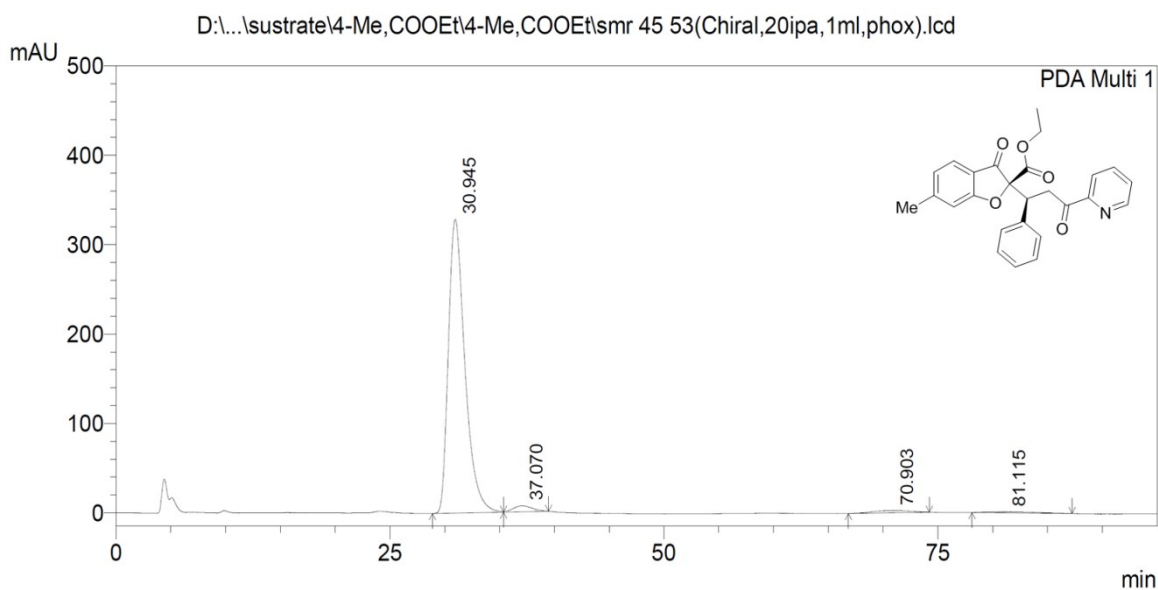

1 PDA Multi 1/210nm 4nm

PeakTable

| Peak# | Ret. Time | Area     | Height | Area %  | Height % |
|-------|-----------|----------|--------|---------|----------|
| 1     | 30.945    | 34448261 | 328655 | 94.971  | 96.823   |
| 2     | 37.070    | 829246   | 6862   | 2.286   | 2.022    |
| 3     | 70.903    | 590263   | 2604   | 1.627   | 0.767    |
| 4     | 81.115    | 404443   | 1320   | 1.115   | 0.389    |
| Total |           | 36272213 | 339441 | 100.000 | 100.000  |

## HPLC chromatogram of compound 40

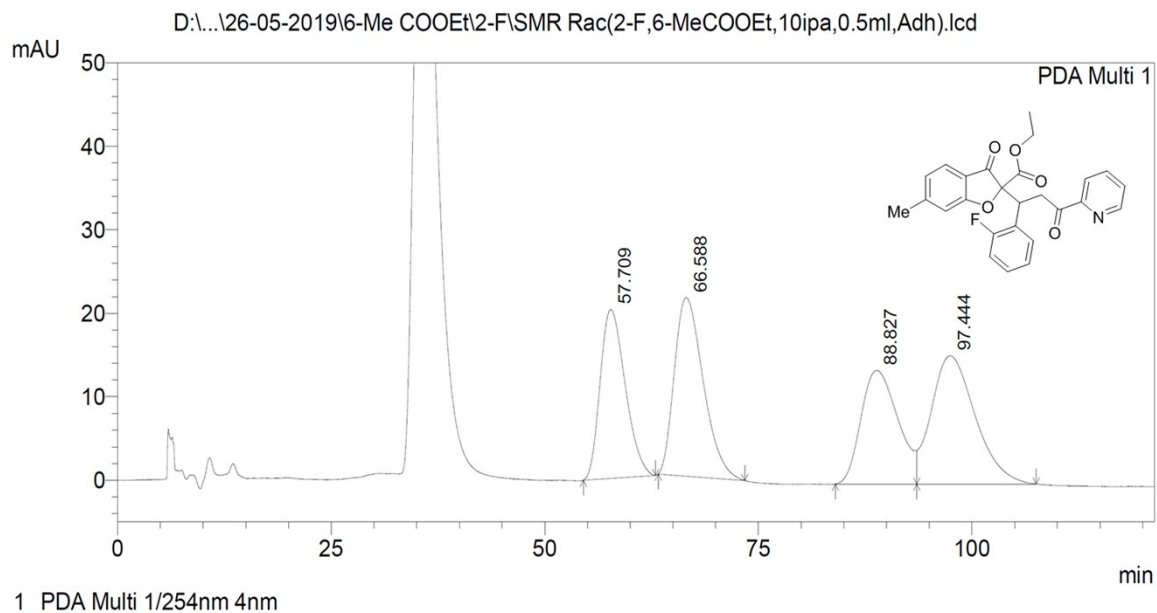

PeakTable

| Peak# | Ret. Time | Area     | Height | Area %  | Height % |
|-------|-----------|----------|--------|---------|----------|
| 1     | 57.709    | 4123258  | 20221  | 21.978  | 28.641   |
| 2     | 66.588    | 5035246  | 21397  | 26.839  | 30.306   |
| 3     | 88.827    | 4112555  | 13621  | 21.921  | 19.293   |
| 4     | 97.444    | 5489777  | 15363  | 29.262  | 21.760   |
| Total |           | 18760837 | 70601  | 100.000 | 100.000  |

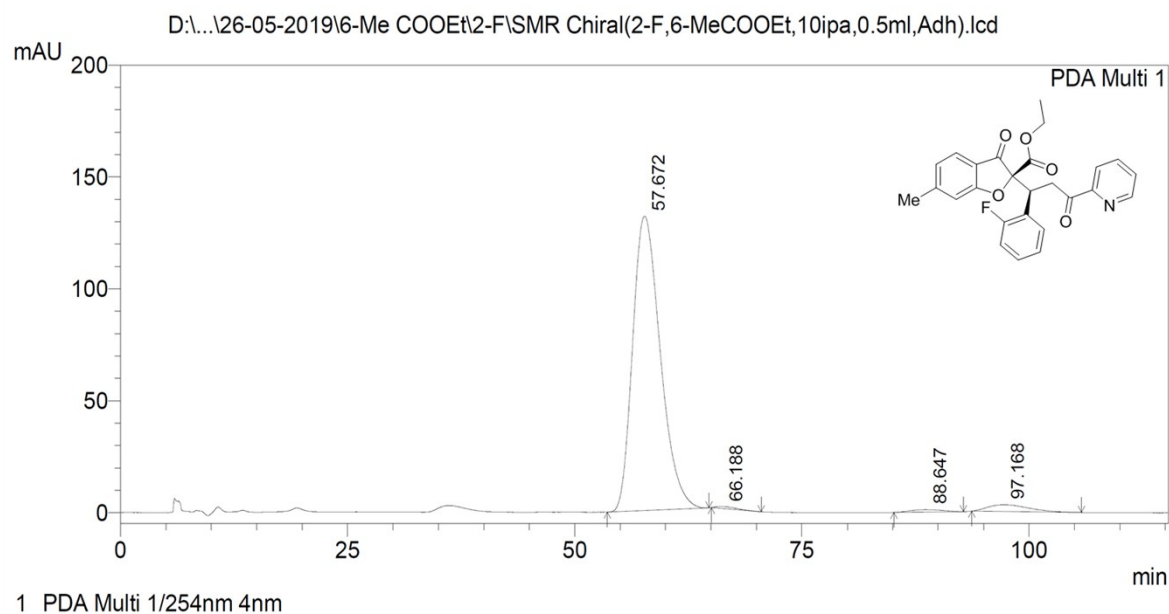

PeakTable

| Peak# | Ret. Time | Area     | Height | Area %  | Height % |
|-------|-----------|----------|--------|---------|----------|
| 1     | 57.672    | 27855249 | 131629 | 95.407  | 96.347   |
| 2     | 66.188    | 128925   | 818    | 0.442   | 0.599    |
| 3     | 88.647    | 264396   | 1126   | 0.906   | 0.825    |
| 4     | 97.168    | 947658   | 3046   | 3.246   | 2.230    |
| Total |           | 29196228 | 136620 | 100.000 | 100.000  |

## HPLC chromatogram of compound 4p

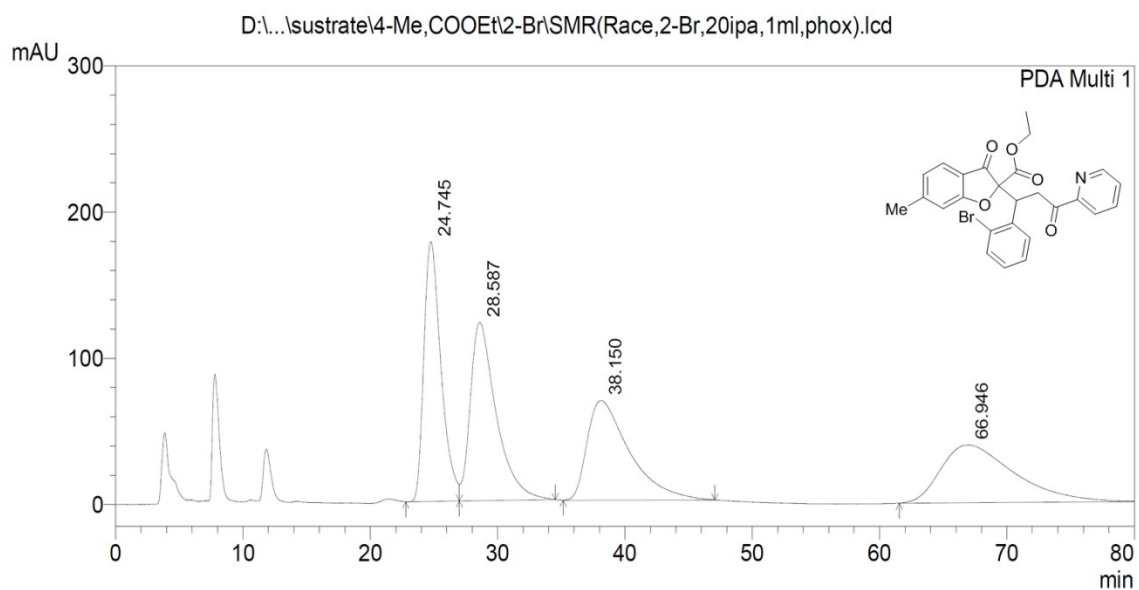

PeakTable

PDA Ch1 210nm 4nm

| Peak# | Ret. Time | Area     | Height | Area %  | Height % |
|-------|-----------|----------|--------|---------|----------|
| 1     | 24.745    | 16633543 | 177630 | 25.380  | 43.622   |
| 2     | 28.587    | 17247983 | 121864 | 26.317  | 29.927   |
| 3     | 38.150    | 15738685 | 68110  | 24.014  | 16.726   |
| 4     | 66.946    | 15918432 | 39600  | 24.289  | 9.725    |
| Total |           | 65538643 | 407204 | 100.000 | 100.000  |

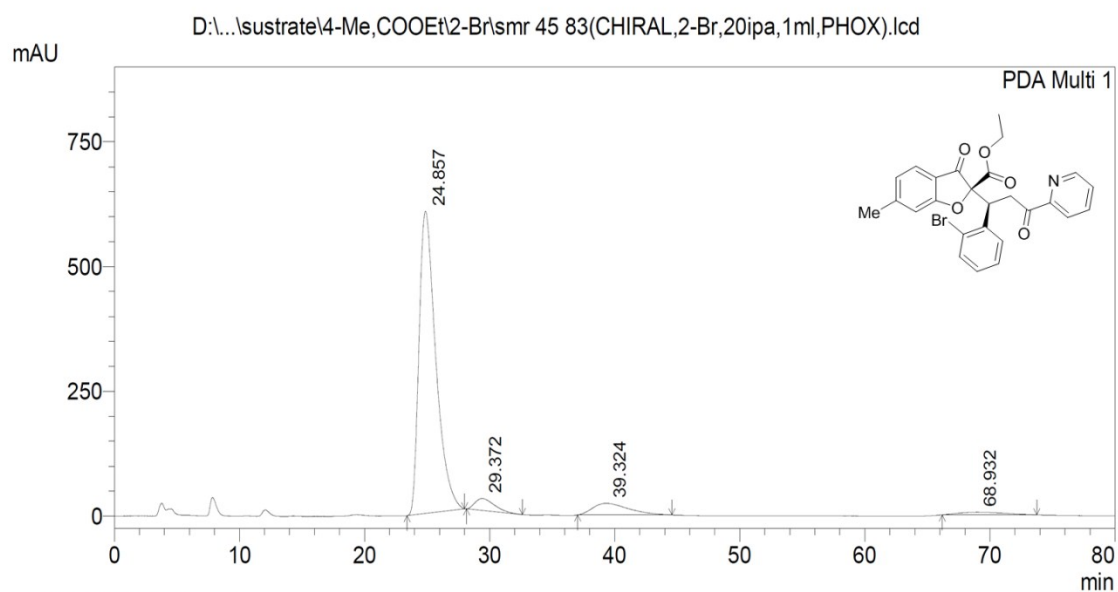

PeakTable

PDA Ch1 210nm 4nm

| Peak# | Ret. Time | Area     | Height | Area %  | Height % |
|-------|-----------|----------|--------|---------|----------|
| 1     | 24.857    | 56438686 | 605715 | 86.670  | 91.987   |
| 2     | 29.372    | 2611243  | 23906  | 4.010   | 3.631    |
| 3     | 39.324    | 4688514  | 23429  | 7.200   | 3.558    |
| 4     | 68.932    | 1380604  | 5426   | 2.120   | 0.824    |
| Total |           | 65119047 | 658476 | 100.000 | 100.000  |

## HPLC chromatogram of compound 4q

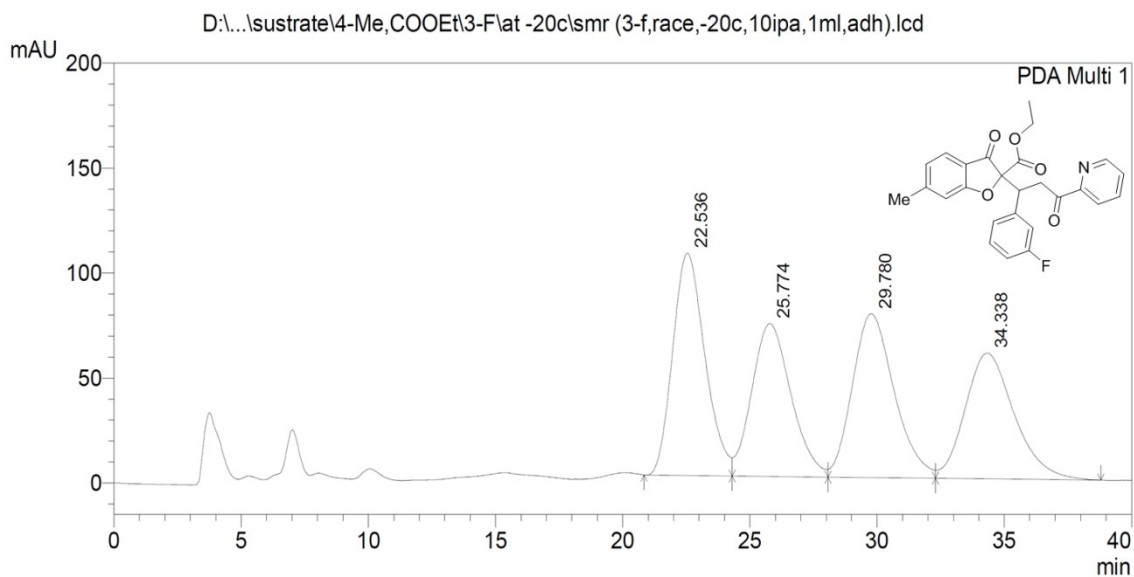

1 PDA Multi 1/210nm 4nm

PeakTable

PDA Ch1 210nm 4nm

| Peak# | Ret. Time | Area     | Height | Area %  | Height % |
|-------|-----------|----------|--------|---------|----------|
| 1     | 22.536    | 9361311  | 105956 | 27.426  | 33.457   |
| 2     | 25.774    | 7817838  | 72824  | 22.904  | 22.995   |
| 3     | 29.780    | 8922847  | 78045  | 26.142  | 24.643   |
| 4     | 34.338    | 8030663  | 59872  | 23.528  | 18.905   |
| Total |           | 34132659 | 316696 | 100.000 | 100.000  |

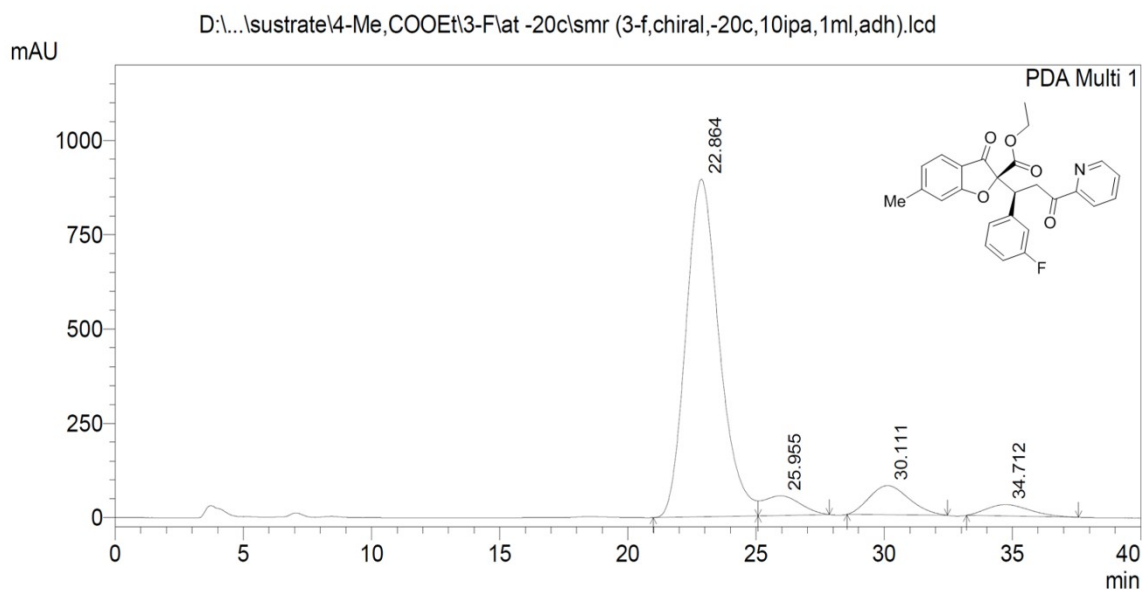

1 PDA Multi 1/210nm 4nm

PeakTable

PDA Ch1 210nm 4nm

| Peak# | Ret. Time | Area     | Height  | Area %  | Height % |
|-------|-----------|----------|---------|---------|----------|
| 1     | 22.864    | 81107805 | 894934  | 82.526  | 84.847   |
| 2     | 25.955    | 5234704  | 52178   | 5.326   | 4.947    |
| 3     | 30.111    | 8365410  | 77425   | 8.512   | 7.341    |
| 4     | 34.712    | 3573832  | 30228   | 3.636   | 2.866    |
| Total |           | 98281751 | 1054765 | 100.000 | 100.000  |

## HPLC chromatogram of compound 4r

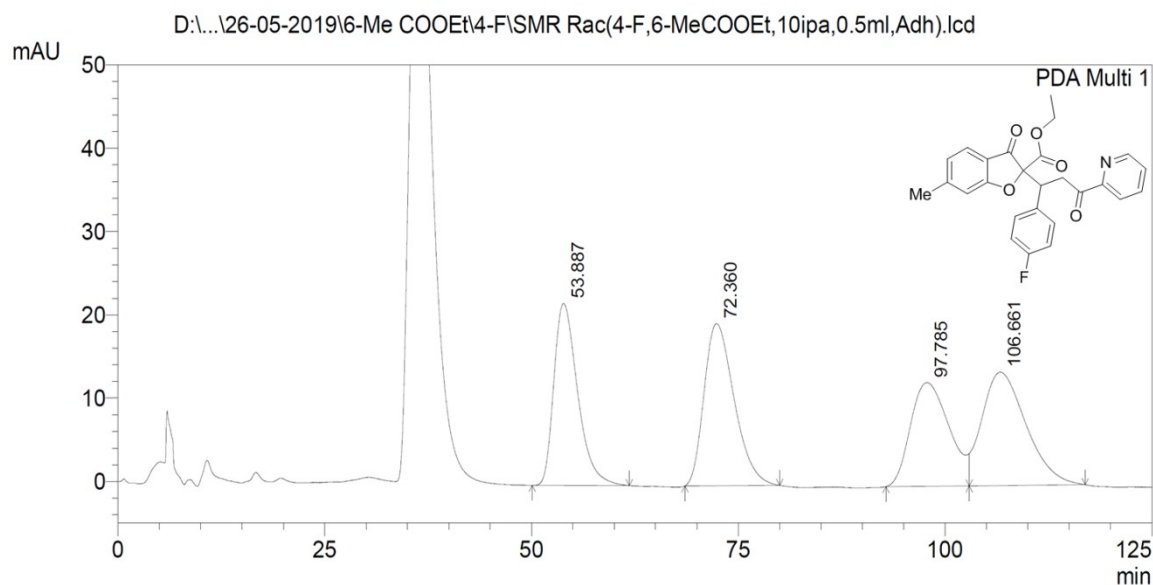

PeakTable

PDA Ch1 254nm 4nm

| Peak# | Ret. Time | Area     | Height | Area %  | Height % |
|-------|-----------|----------|--------|---------|----------|
| 1     | 53.887    | 4368979  | 21838  | 23.725  | 32.422   |
| 2     | 72.360    | 4933314  | 19469  | 26.790  | 28.905   |
| 3     | 97.785    | 4064720  | 12442  | 22.073  | 18.473   |
| 4     | 106.661   | 5047736  | 13605  | 27.411  | 20.200   |
| Total |           | 18414750 | 67354  | 100.000 | 100.000  |

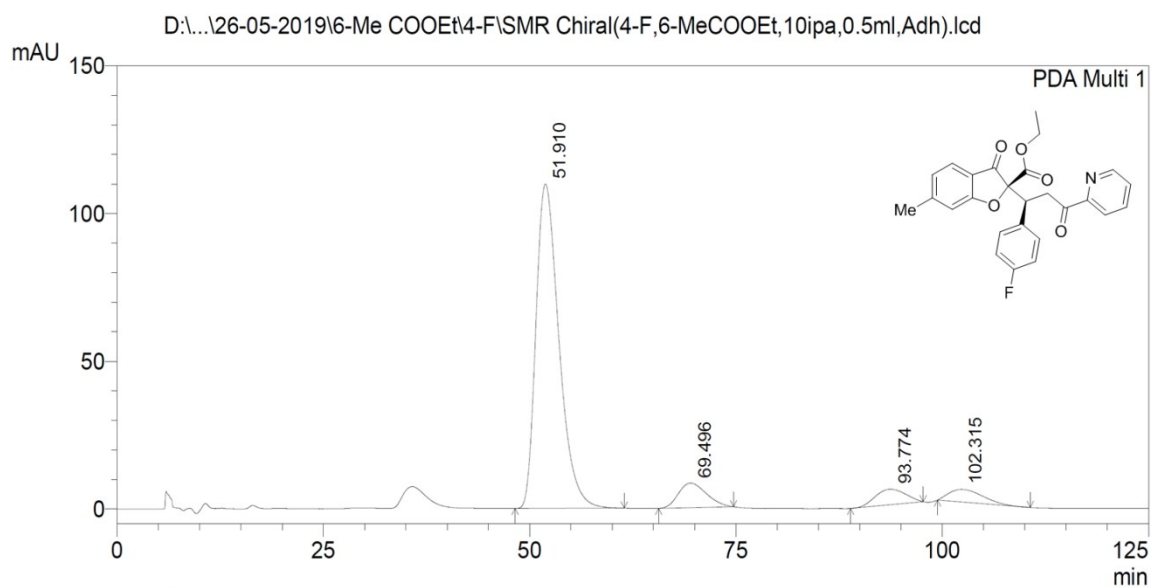

PeakTable

PDA Ch1 254nm 4nm

| Peak# | Ret. Time | Area     | Height | Area %  | Height % |
|-------|-----------|----------|--------|---------|----------|
| 1     | 51.910    | 21289720 | 109735 | 82.383  | 86.014   |
| 2     | 69.496    | 1971003  | 8321   | 7.627   | 6.522    |
| 3     | 93.774    | 1343261  | 5237   | 5.198   | 4.105    |
| 4     | 102.315   | 1238386  | 4286   | 4.792   | 3.359    |
| Total |           | 25842370 | 127579 | 100.000 | 100.000  |

## HPLC chromatogram of compound 4s

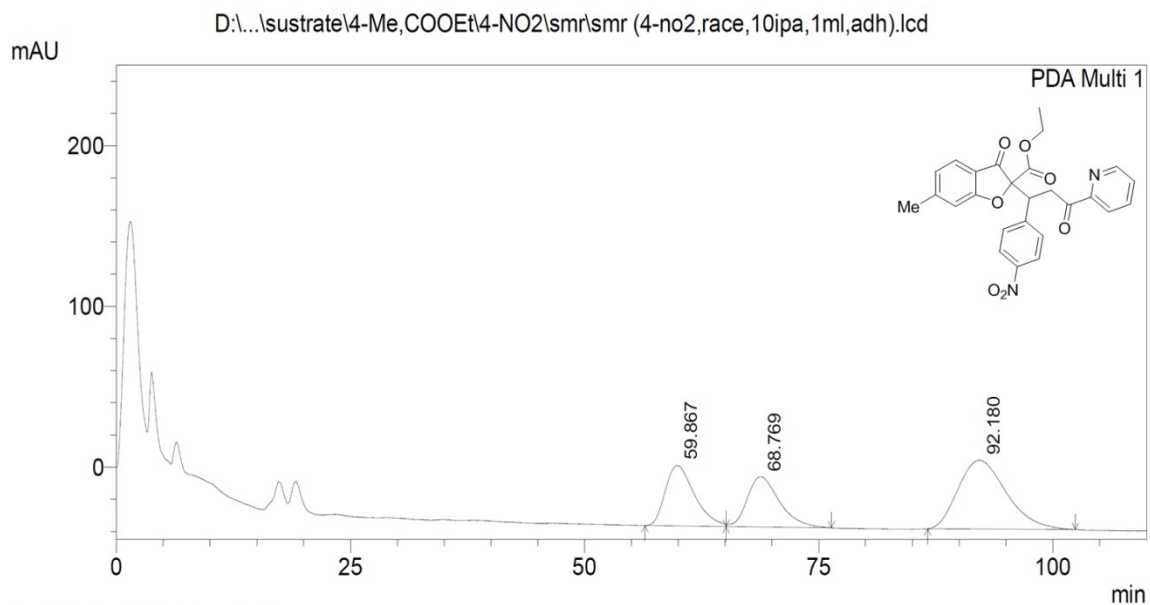

1 PDA Multi 1/210nm 4nm

PeakTable

PDA Ch1 210nm 4nm

| Peak# | Ret. Time | Area     | Height | Area %  | Height % |
|-------|-----------|----------|--------|---------|----------|
| 1     | 59.867    | 8141377  | 37624  | 26.317  | 33.712   |
| 2     | 68.769    | 7454790  | 31223  | 24.098  | 27.977   |
| 3     | 92.180    | 15339762 | 42756  | 49.586  | 38.311   |
| Total |           | 30935929 | 111603 | 100.000 | 100.000  |

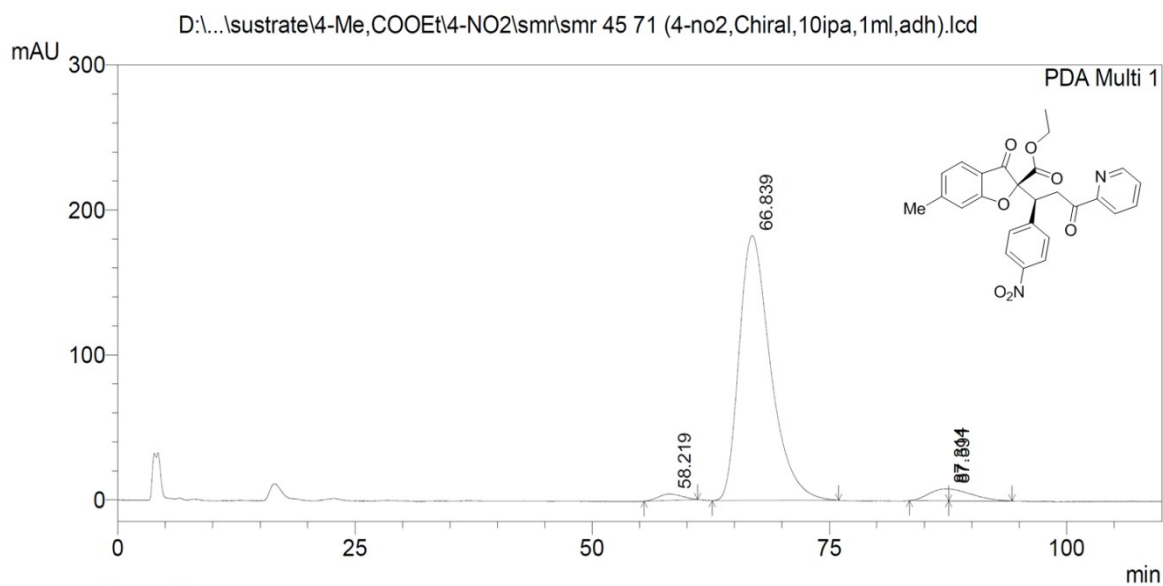

1 PDA Multi 1/210nm 4nm

PeakTable

PDA Ch1 210nm 4nm

| Peak# | Ret. Time | Area     | Height | Area %  | Height % |
|-------|-----------|----------|--------|---------|----------|
| 1     | 58.219    | 758117   | 4343   | 1.672   | 2.135    |
| 2     | 66.839    | 42089688 | 182607 | 92.840  | 89.784   |
| 3     | 87.314    | 1119469  | 8253   | 2.469   | 4.058    |
| 4     | 87.591    | 1368288  | 8182   | 3.018   | 4.023    |
| Total |           | 45335562 | 203384 | 100.000 | 100.000  |

## HPLC chromatogram of compound 4t

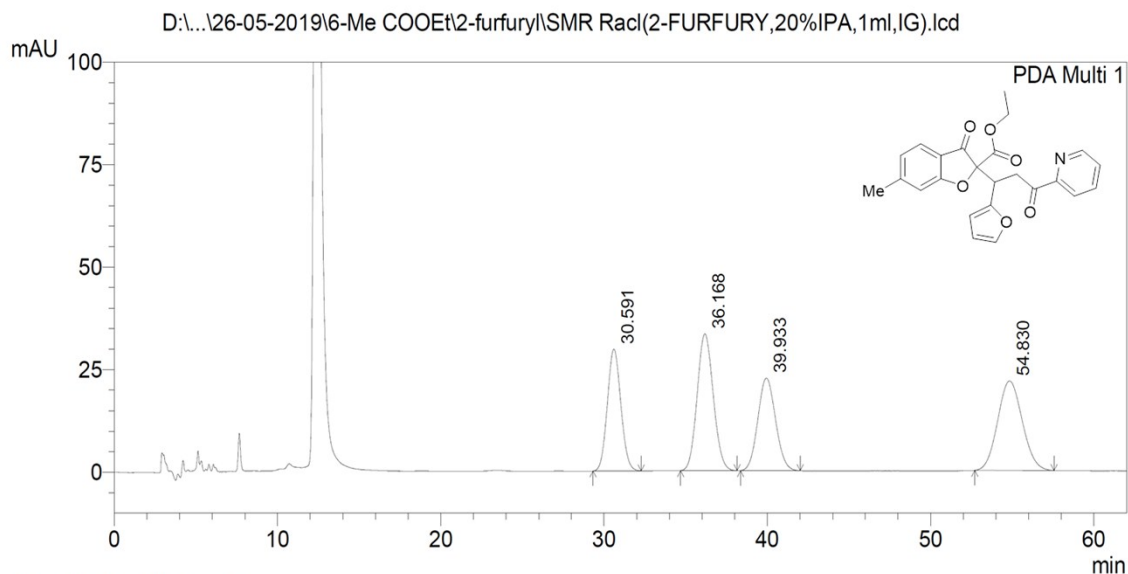

PeakTable

PDA Ch1 254nm 4nm

| Peak# | Ret. Time | Area    | Height | Area %  | Height % |
|-------|-----------|---------|--------|---------|----------|
| 1     | 30.591    | 1709091 | 29690  | 21.388  | 27.630   |
| 2     | 36.168    | 2291149 | 33356  | 28.672  | 31.042   |
| 3     | 39.933    | 1703069 | 22576  | 21.312  | 21.010   |
| 4     | 54.830    | 2287682 | 21833  | 28.628  | 20.318   |
| Total |           | 7990990 | 107455 | 100.000 | 100.000  |

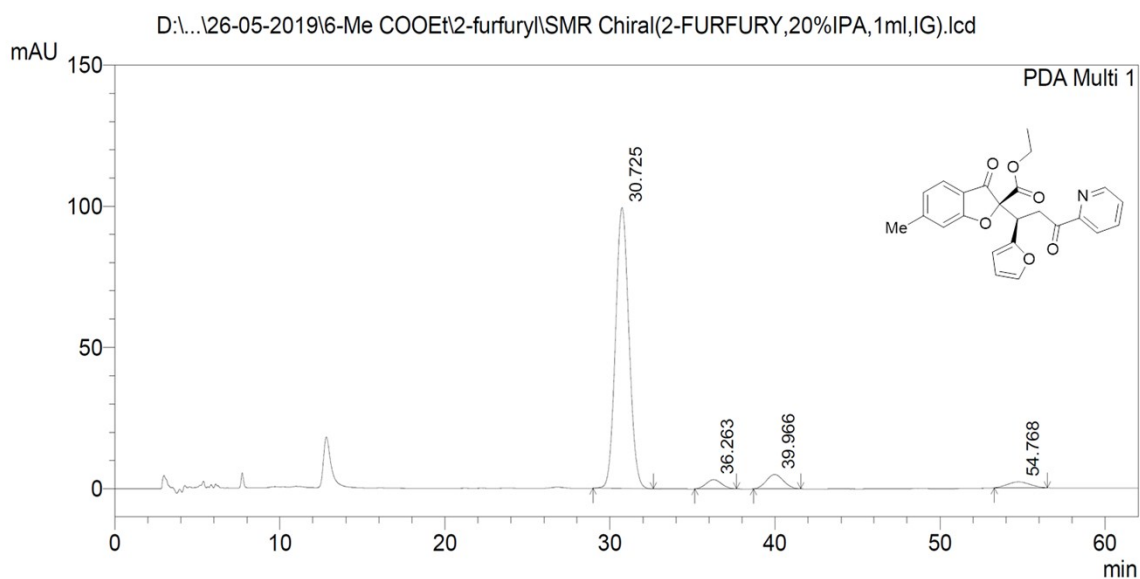

PeakTable

PDA Ch1 254nm 4nm

| Peak# | Ret. Time | Area    | Height | Area %  | Height % |
|-------|-----------|---------|--------|---------|----------|
| 1     | 30.725    | 5643251 | 99501  | 87.999  | 90.553   |
| 2     | 36.263    | 209451  | 3223   | 3.266   | 2.933    |
| 3     | 39.966    | 364689  | 5063   | 5.687   | 4.607    |
| 4     | 54.768    | 195501  | 2096   | 3.049   | 1.907    |
| Total |           | 6412893 | 109882 | 100.000 | 100.000  |

## 9. HPLC chromatogram of compound ent-4a

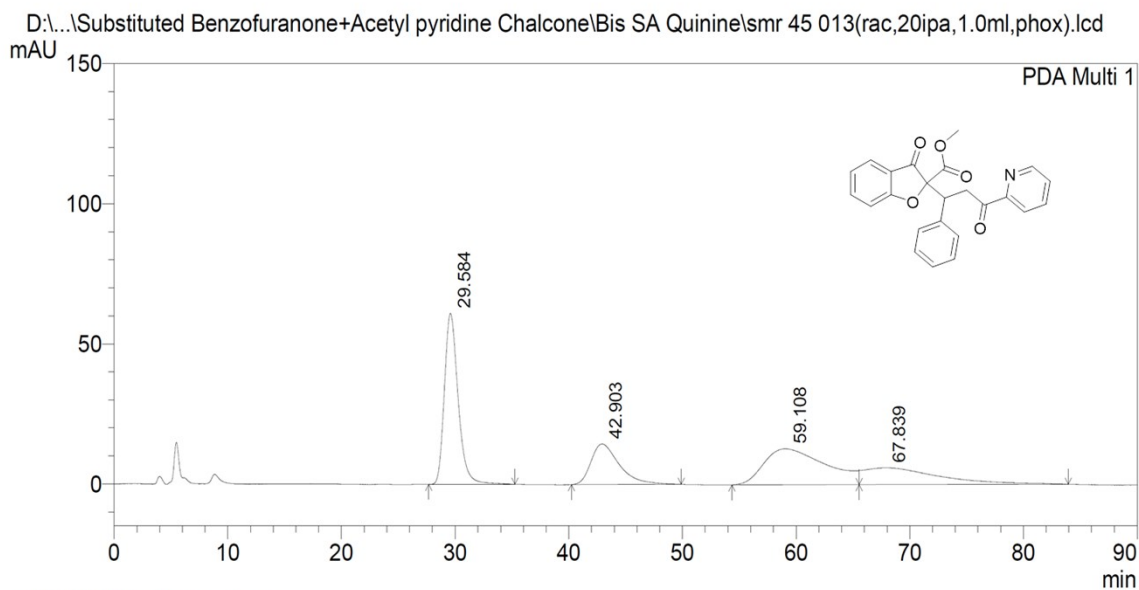

1 PDA Multi 1/254nm 4nm

PeakTable

PDA Ch1 254nm 4nm

| Peak# | Ret. Time | Area     | Height | Area %  | Height % |
|-------|-----------|----------|--------|---------|----------|
| 1     | 29.584    | 5122101  | 60978  | 33.582  | 64.661   |
| 2     | 42.903    | 2501021  | 14480  | 16.397  | 15.355   |
| 3     | 59.108    | 4876433  | 12842  | 31.971  | 13.618   |
| 4     | 67.839    | 2753025  | 6003   | 18.050  | 6.366    |
| Total |           | 15252580 | 94304  | 100.000 | 100.000  |

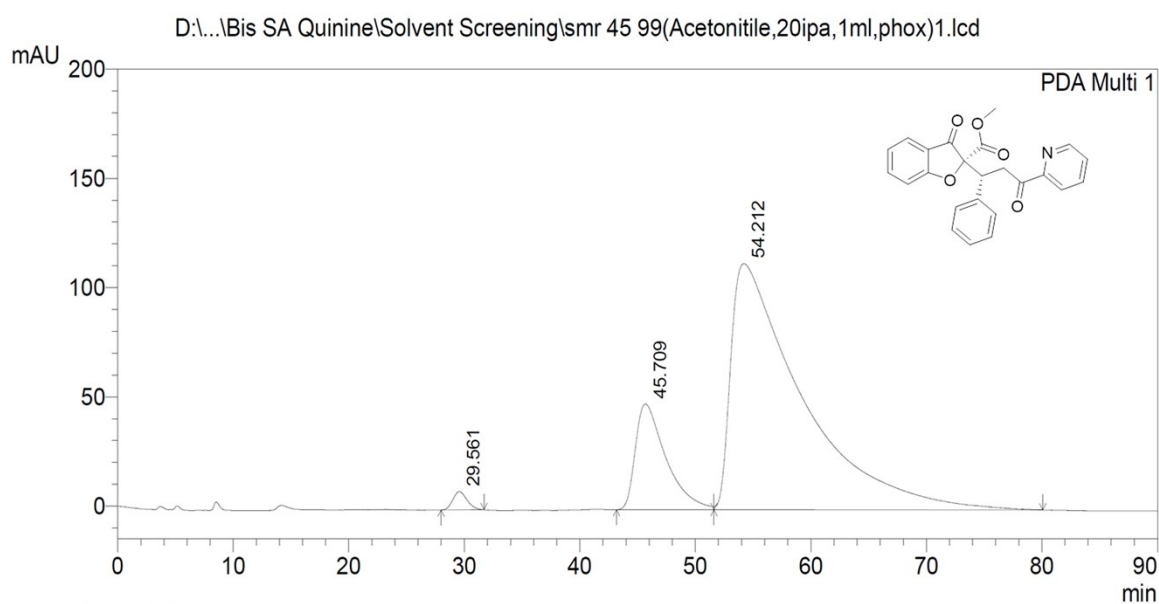

1 PDA Multi 1/254nm 4nm

PeakTable

PDA Ch1 254nm 4nm

| Peak# | Ret. Time | Area     | Height | Area %  | Height % |
|-------|-----------|----------|--------|---------|----------|
| 1     | 29.561    | 716376   | 8438   | 1.238   | 4.980    |
| 2     | 45.709    | 8880487  | 48386  | 15.348  | 28.554   |
| 3     | 54.212    | 48264790 | 112626 | 83.414  | 66.466   |
| Total |           | 57861653 | 169450 | 100.000 | 100.000  |

## HPLC chromatogram of compound ent-4b

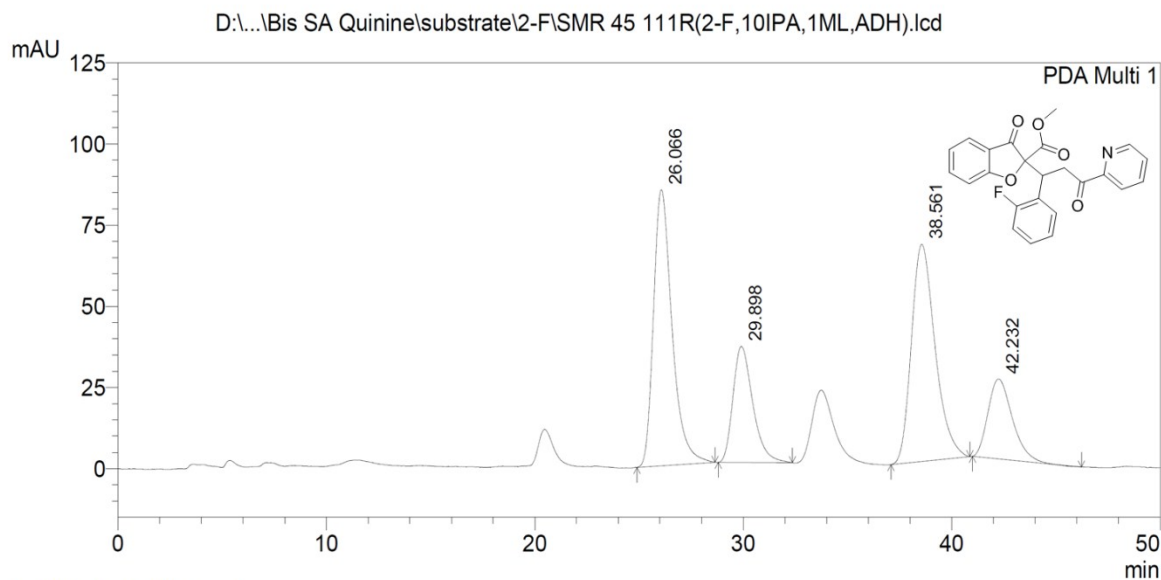

PeakTable

| Peak# | Ret. Time | Area     | Height | Area %  | Height % |
|-------|-----------|----------|--------|---------|----------|
| 1     | 26.066    | 5266225  | 85082  | 35.254  | 40.062   |
| 2     | 29.898    | 2373566  | 35768  | 15.890  | 16.842   |
| 3     | 38.561    | 5296072  | 66887  | 35.454  | 31.494   |
| 4     | 42.232    | 2002030  | 24640  | 13.402  | 11.602   |
| Total |           | 14937893 | 212378 | 100.000 | 100.000  |

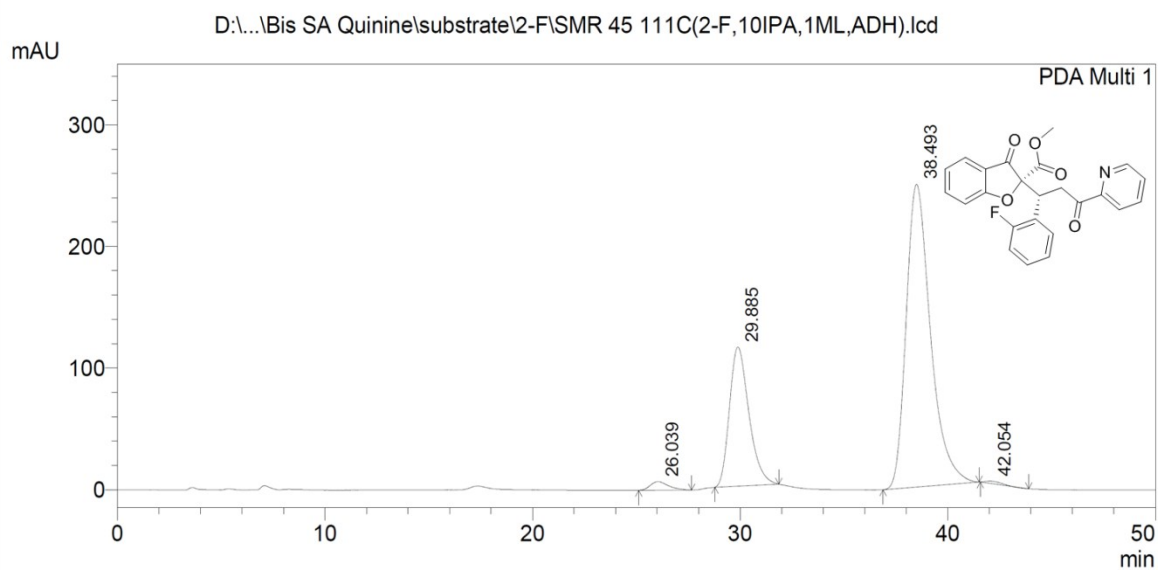

PeakTable

| Peak# | Ret. Time | Area     | Height | Area %  | Height % |
|-------|-----------|----------|--------|---------|----------|
| 1     | 26.039    | 426094   | 7042   | 1.505   | 1.891    |
| 2     | 29.885    | 7452137  | 114434 | 26.320  | 30.738   |
| 3     | 38.493    | 20347224 | 248998 | 71.864  | 66.883   |
| 4     | 42.054    | 88122    | 1813   | 0.311   | 0.487    |
| Total |           | 28313577 | 372287 | 100.000 | 100.000  |

## HPLC chromatogram of compound ent-4e

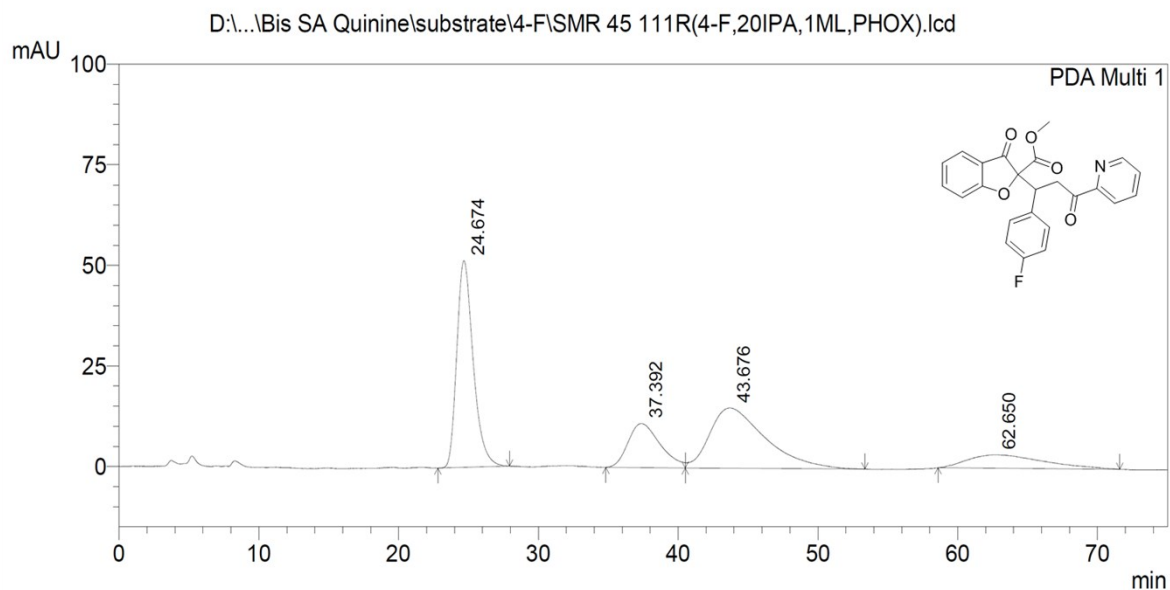

1 PDA Multi 1/254nm 4nm

PeakTable

PDA Ch1 254nm 4nm

| Peak# | Ret. Time | Area     | Height | Area %  | Height % |
|-------|-----------|----------|--------|---------|----------|
| 1     | 24.674    | 4200030  | 51430  | 37.016  | 63.684   |
| 2     | 37.392    | 1742775  | 10973  | 15.359  | 13.587   |
| 3     | 43.676    | 4140631  | 14969  | 36.492  | 18.536   |
| 4     | 62.650    | 1263132  | 3386   | 11.132  | 4.193    |
| Total |           | 11346567 | 80758  | 100.000 | 100.000  |

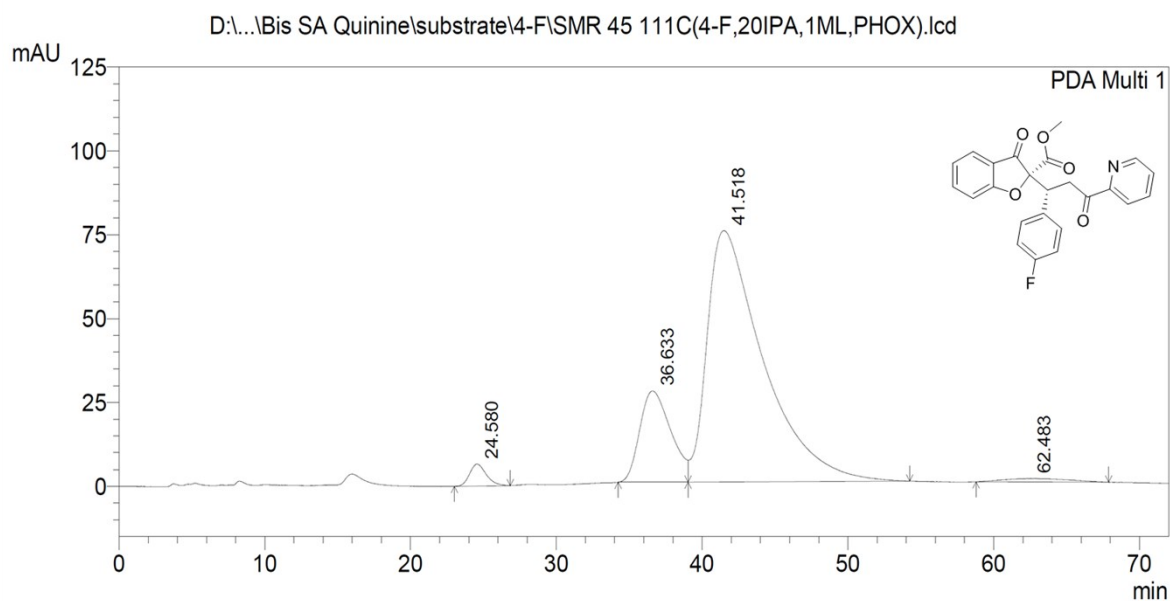

1 PDA Multi 1/254nm 4nm

PeakTable

PDA Ch1 254nm 4nm

| Peak# | Ret. Time | Area     | Height | Area %  | Height % |
|-------|-----------|----------|--------|---------|----------|
| 1     | 24.580    | 519881   | 6539   | 2.089   | 5.965    |
| 2     | 36.633    | 4022091  | 27183  | 16.163  | 24.797   |
| 3     | 41.518    | 20019400 | 74874  | 80.451  | 68.302   |
| 4     | 62.483    | 322556   | 1026   | 1.296   | 0.936    |
| Total |           | 24883928 | 109622 | 100.000 | 100.000  |

## HPLC chromatogram of compound ent-4f

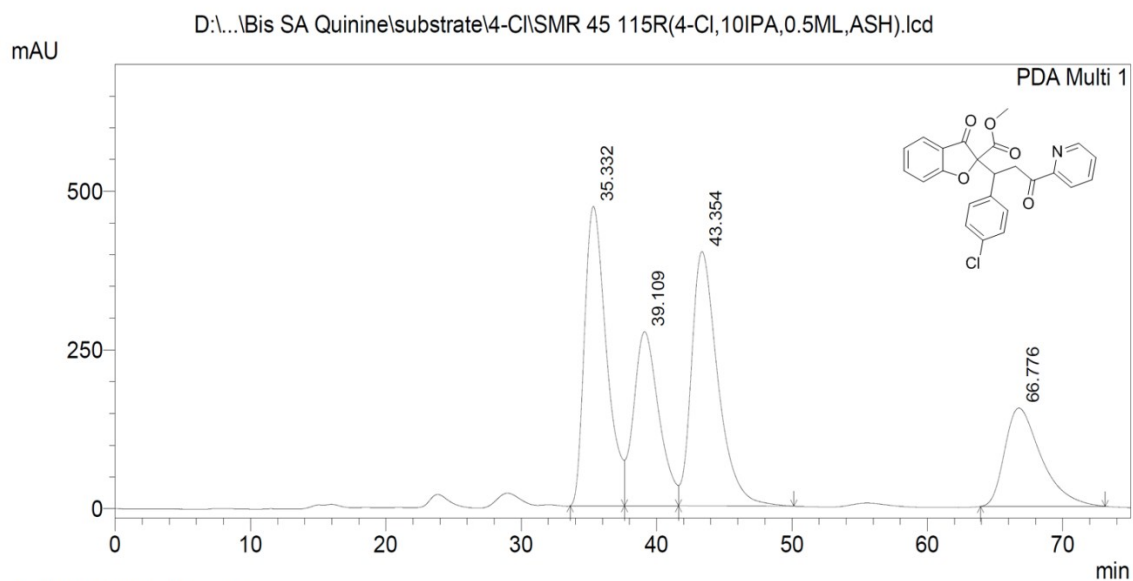

1 PDA Multi 1/254nm 4nm

PeakTable

PDA Ch1 254nm 4nm

| Peak# | Ret. Time | Area      | Height  | Area %  | Height % |
|-------|-----------|-----------|---------|---------|----------|
| 1     | 35.332    | 53038055  | 471386  | 30.766  | 36.227   |
| 2     | 39.109    | 35608088  | 274410  | 20.655  | 21.089   |
| 3     | 43.354    | 54648017  | 400569  | 31.700  | 30.784   |
| 4     | 66.776    | 29098590  | 154848  | 16.879  | 11.900   |
| Total |           | 172392749 | 1301213 | 100.000 | 100.000  |

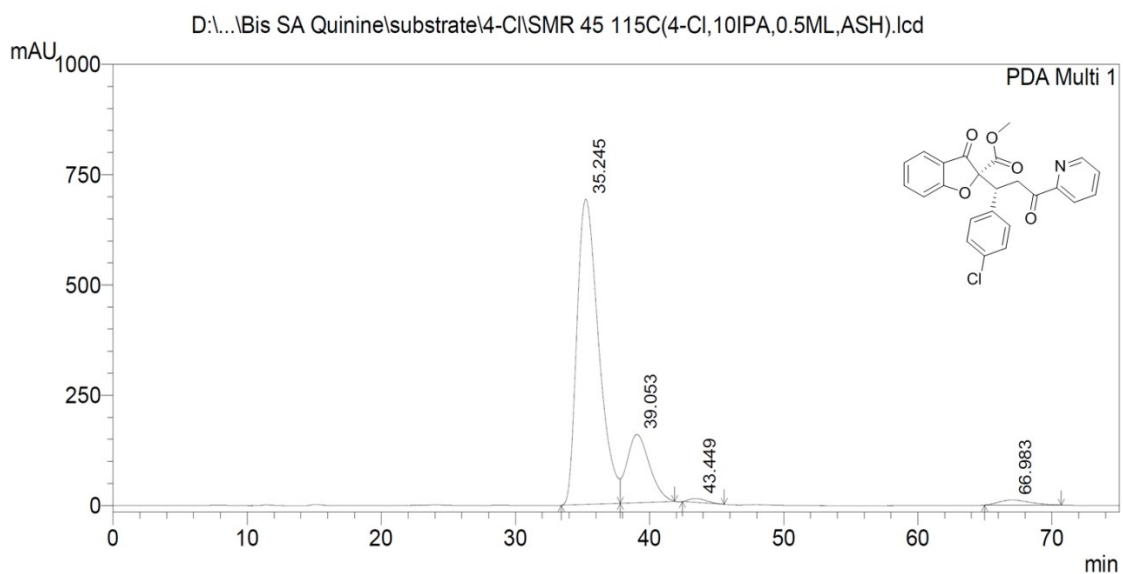

1 PDA Multi 1/254nm 4nm

PeakTable

PDA Ch1 254nm 4nm

| Peak# | Ret. Time | Area     | Height | Area %  | Height % |
|-------|-----------|----------|--------|---------|----------|
| 1     | 35.245    | 77967869 | 691961 | 78.815  | 79.788   |
| 2     | 39.053    | 18261625 | 154737 | 18.460  | 17.842   |
| 3     | 43.449    | 839055   | 8985   | 0.848   | 1.036    |
| 4     | 66.983    | 1857108  | 11568  | 1.877   | 1.334    |
| Total |           | 98925657 | 867251 | 100.000 | 100.000  |

## HPLC chromatogram of compound ent-4g

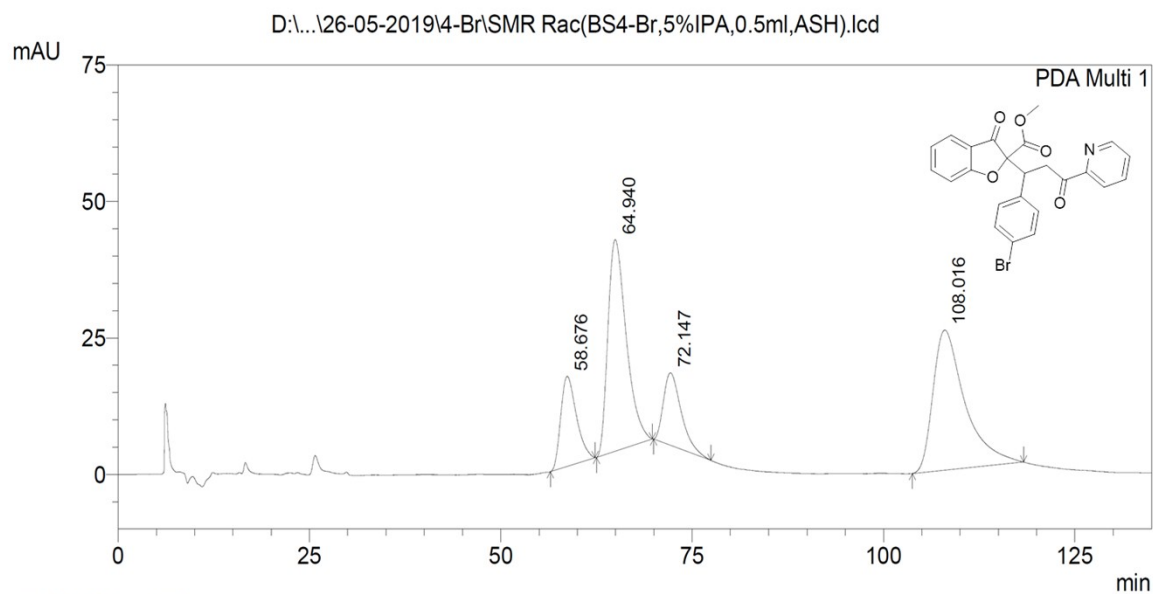

PeakTable

| Peak# | Ret. Time | Area     | Height | Area %  | Height % |
|-------|-----------|----------|--------|---------|----------|
| 1     | 58.676    | 2365309  | 16526  | 12.791  | 17.534   |
| 2     | 64.940    | 6504829  | 38780  | 35.176  | 41.144   |
| 3     | 72.147    | 2162271  | 13281  | 11.693  | 14.091   |
| 4     | 108.016   | 7459779  | 25666  | 40.340  | 27.231   |
| Total |           | 18492188 | 94253  | 100.000 | 100.000  |

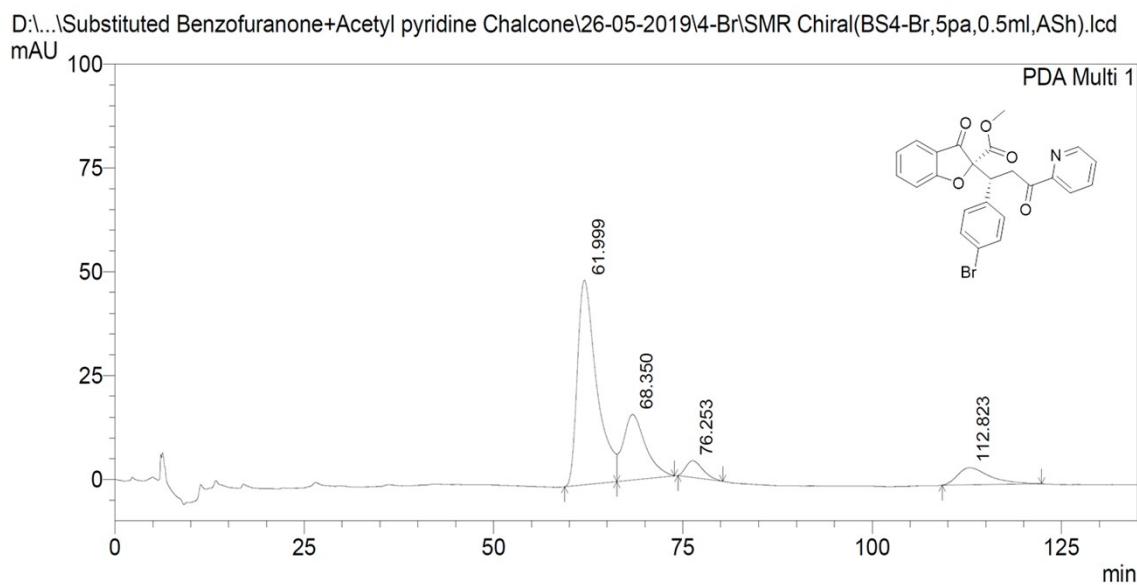

PeakTable

| Peak# | Ret. Time | Area     | Height | Area %  | Height % |
|-------|-----------|----------|--------|---------|----------|
| 1     | 61.999    | 8724041  | 49243  | 63.001  | 67.314   |
| 2     | 68.350    | 3281164  | 15775  | 23.695  | 21.564   |
| 3     | 76.253    | 624273   | 4009   | 4.508   | 5.480    |
| 4     | 112.823   | 1218095  | 4127   | 8.796   | 5.641    |
| Total |           | 13847573 | 73154  | 100.000 | 100.000  |

## HPLC chromatogram of compound ent-4n

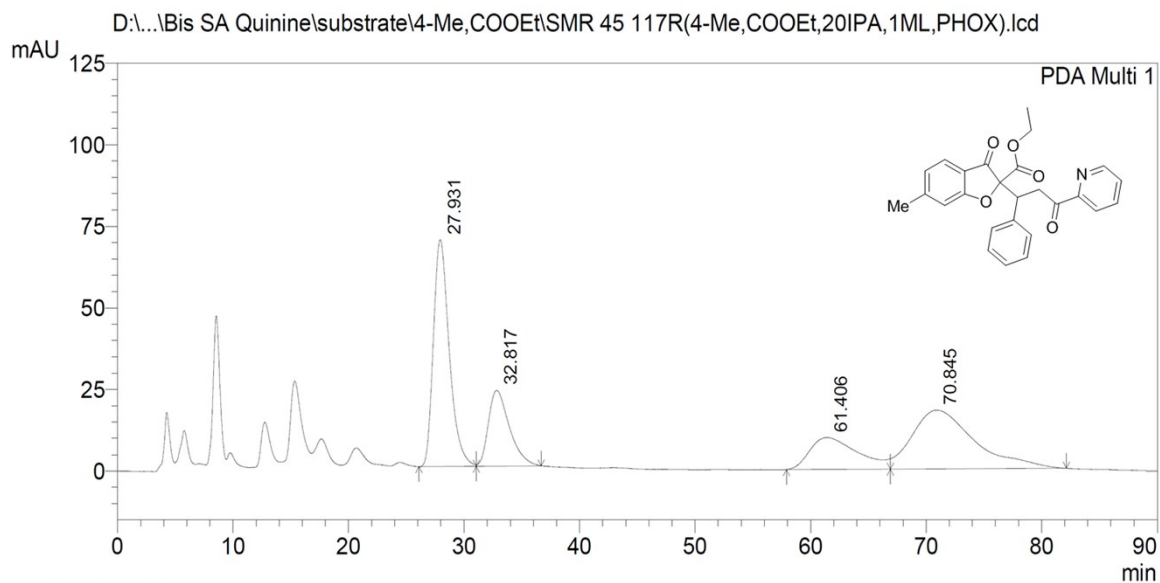

1 PDA Multi 1/254nm 4nm

PeakTable

PDA Ch1 254nm 4nm

| Peak# | Ret. Time | Area     | Height | Area %  | Height % |
|-------|-----------|----------|--------|---------|----------|
| 1     | 27.931    | 6643144  | 69561  | 34.657  | 57.674   |
| 2     | 32.817    | 2939896  | 23250  | 15.337  | 19.277   |
| 3     | 61.406    | 2831366  | 9777   | 14.771  | 8.107    |
| 4     | 70.845    | 6753711  | 18021  | 35.234  | 14.942   |
| Total |           | 19168118 | 120609 | 100.000 | 100.000  |

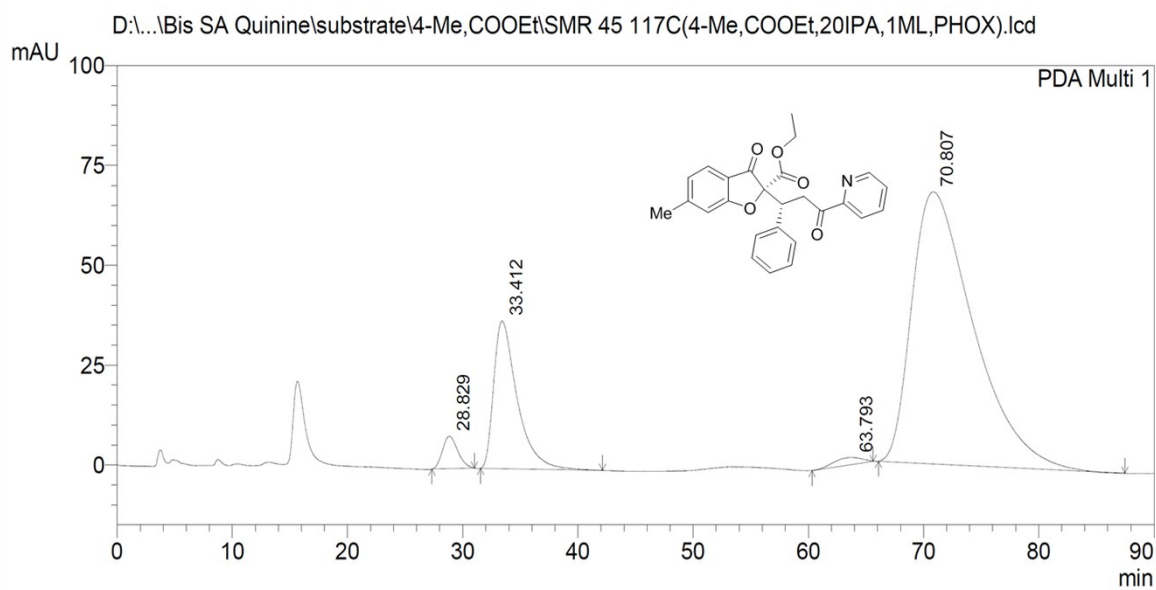

1 PDA Multi 1/254nm 4nm

PeakTable

PDA Ch1 254nm 4nm

| Peak# | Ret. Time | Area     | Height | Area %  | Height % |
|-------|-----------|----------|--------|---------|----------|
| 1     | 28.829    | 749436   | 8144   | 2.367   | 7.083    |
| 2     | 33.412    | 5243129  | 37010  | 16.563  | 32.189   |
| 3     | 63.793    | 307228   | 1730   | 0.971   | 1.505    |
| 4     | 70.807    | 25356516 | 68093  | 80.099  | 59.223   |
| Total |           | 31656309 | 114976 | 100.000 | 100.000  |

## 10. Control Experiments

# <sup>1</sup>H and <sup>13</sup>C NMR spectrum of compound 6

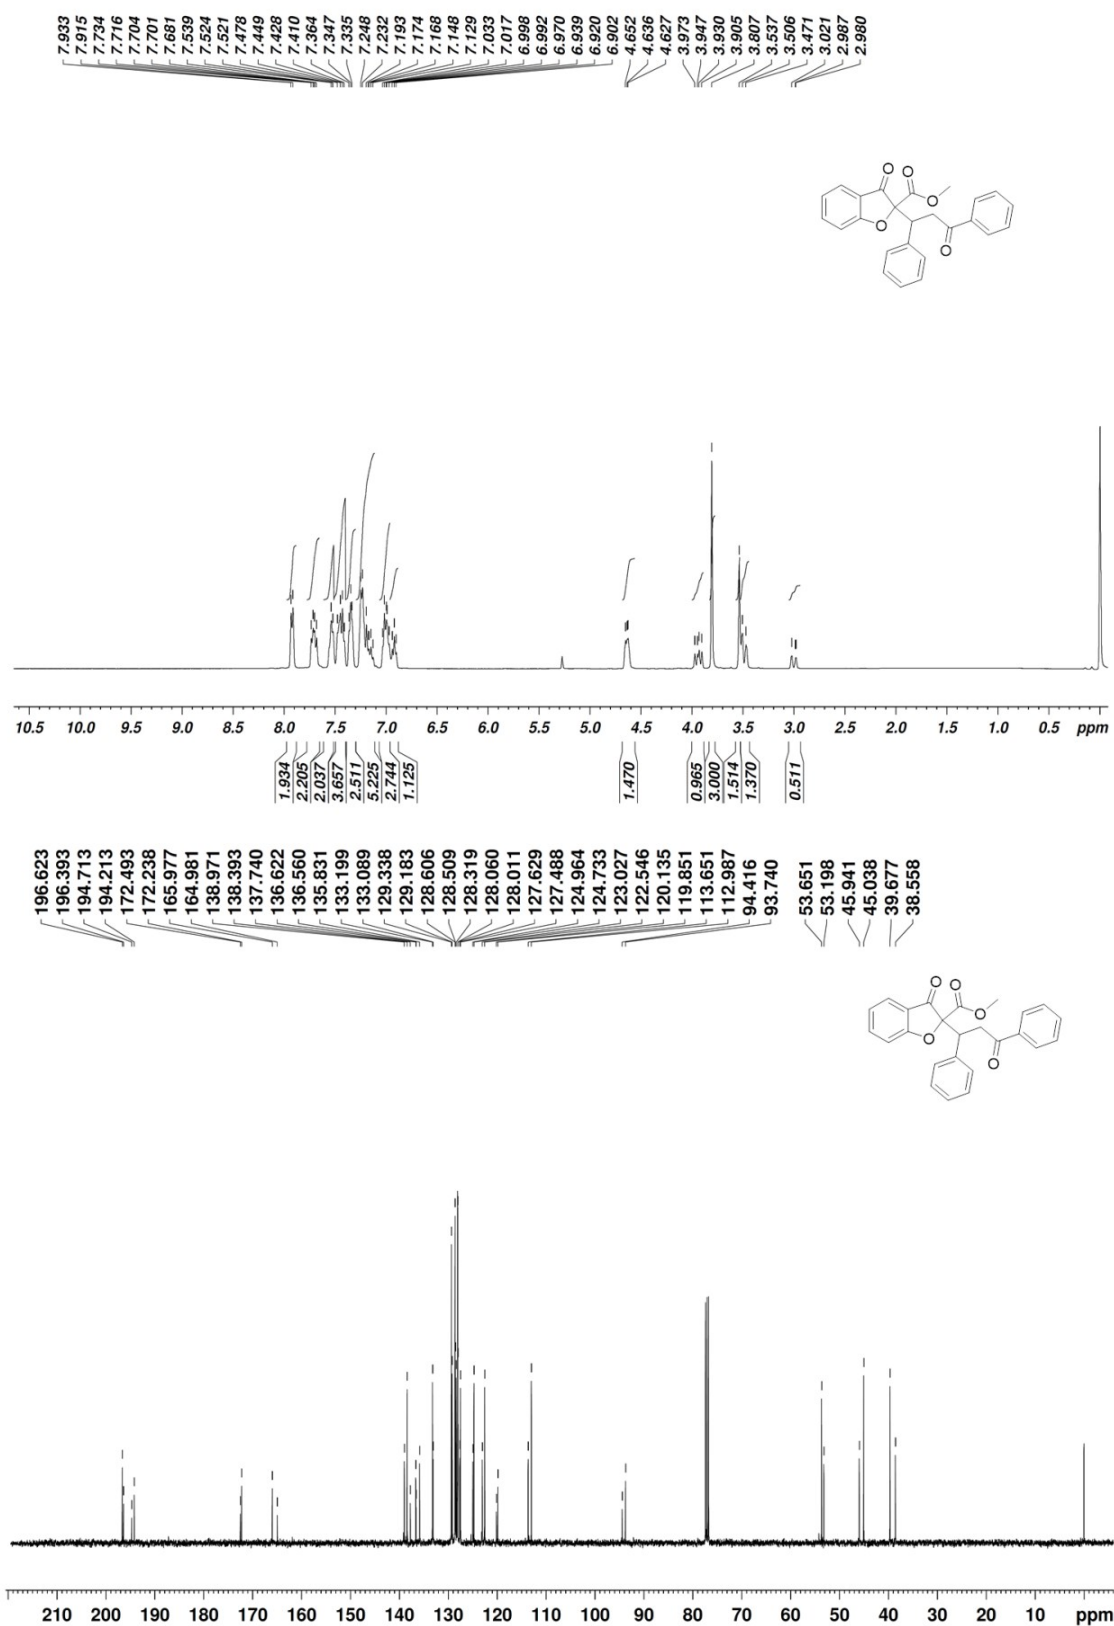

# <sup>1</sup>H and <sup>13</sup>C NMR spectrum of compound 8

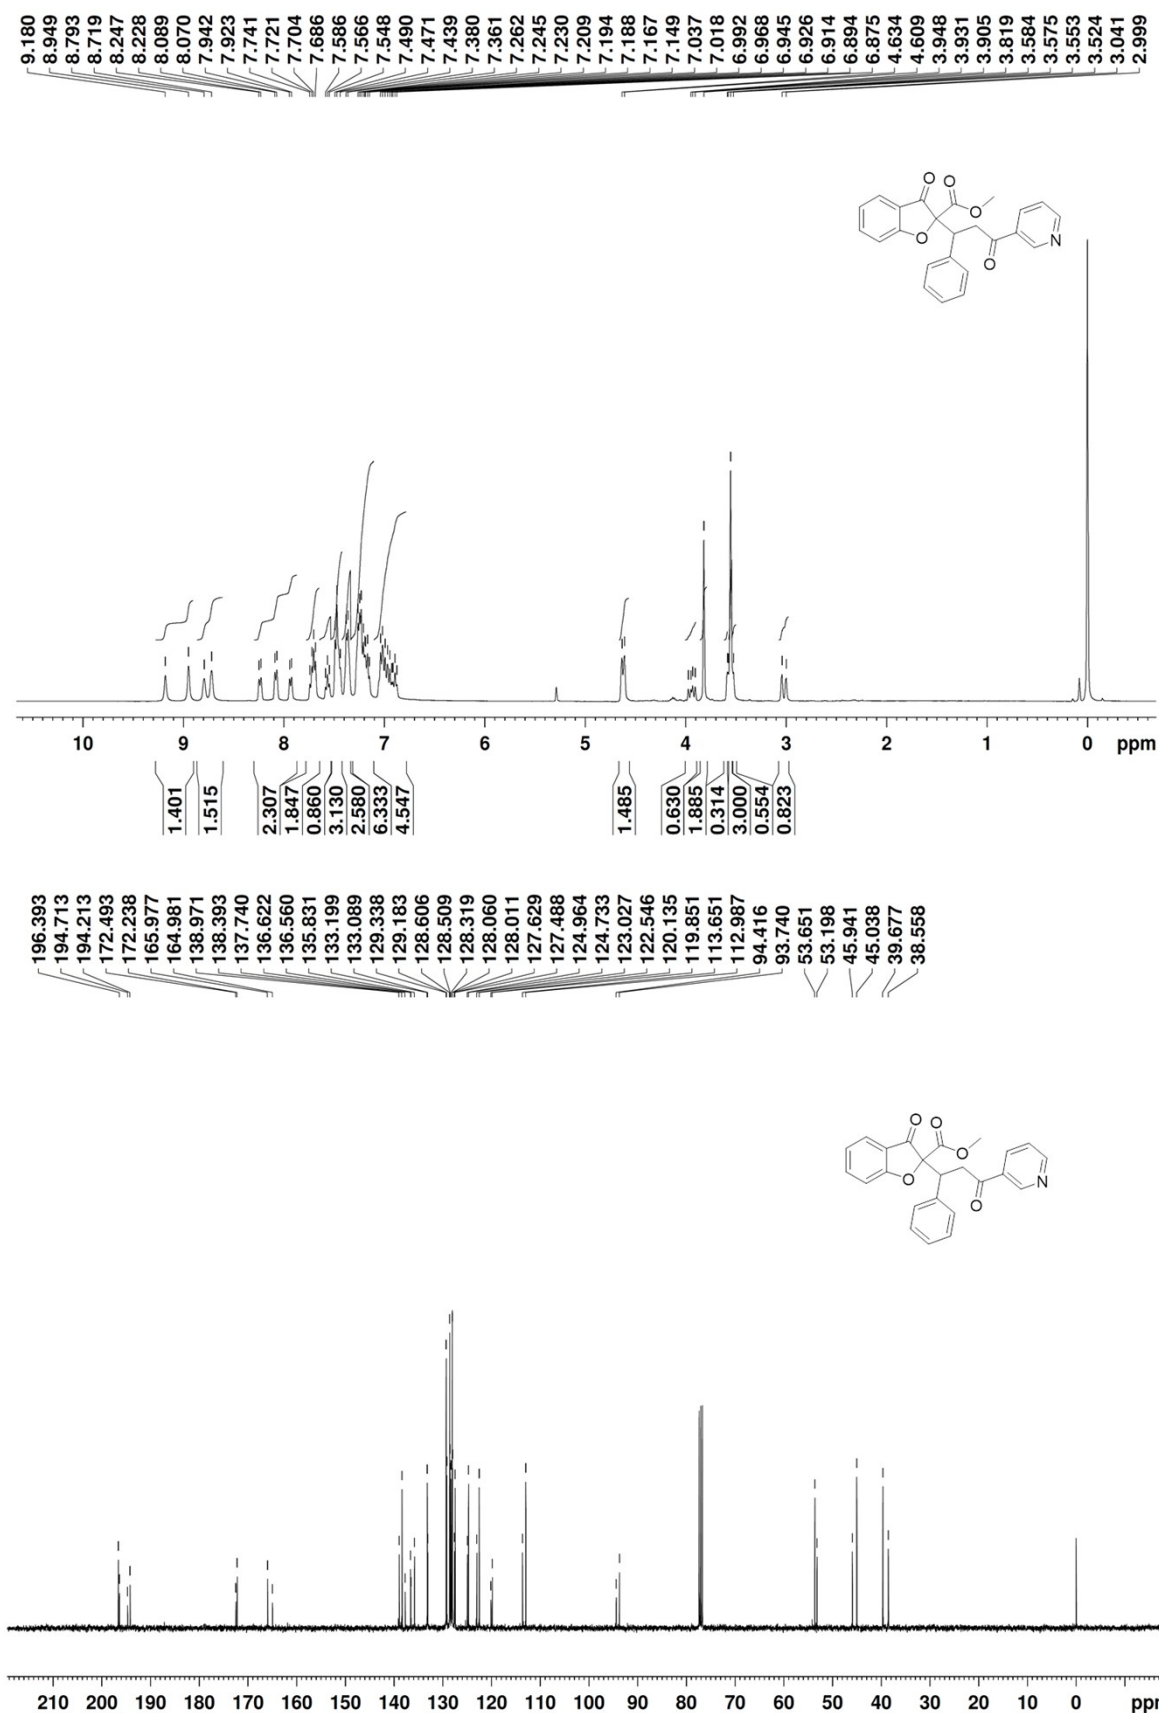

**HPLC chromatogram of compound 6 (Catalyst 3k)**

D:\...\Substituted Benzofuranone+Acetyl pyridine Chalcone\chalcone\SMR chalcone(rac,RT,20 IPA,1ML,phox).lcd

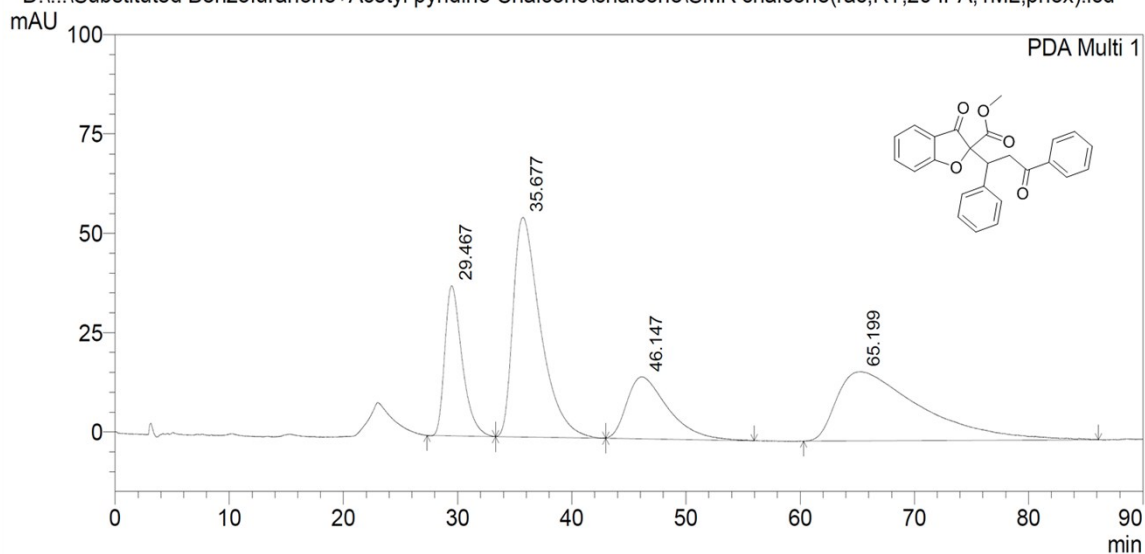

PeakTable

PDA Ch1 254nm 4nm

| Peak# | Ret. Time | Area     | Height | Area %  | Height % |
|-------|-----------|----------|--------|---------|----------|
| 1     | 29.467    | 3995415  | 37825  | 15.308  | 29.966   |
| 2     | 35.677    | 9258021  | 55293  | 35.472  | 43.803   |
| 3     | 46.147    | 3915771  | 15655  | 15.003  | 12.402   |
| 4     | 65.199    | 8930508  | 17456  | 34.217  | 13.829   |
| Total |           | 26099714 | 126229 | 100.000 | 100.000  |

D:\...\chalcone\SMR chalcone(prol basa,RT,20 IPA,1ML,phox).lcd

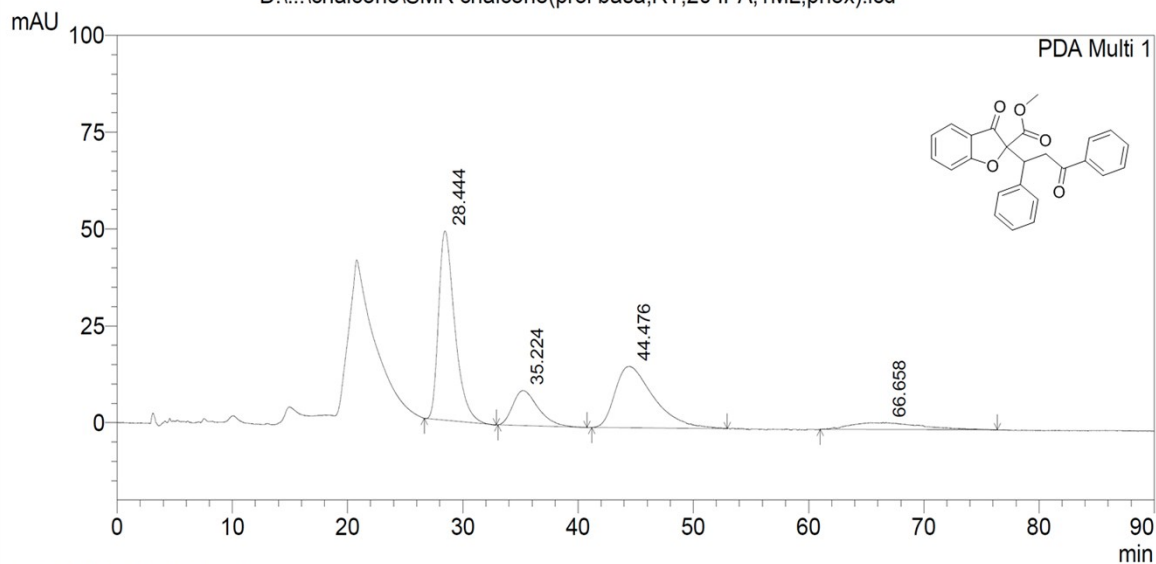

PeakTable

PDA Ch1 254nm 4nm

| Peak# | Ret. Time | Area     | Height | Area %  | Height % |
|-------|-----------|----------|--------|---------|----------|
| 1     | 28.444    | 4787278  | 48871  | 45.052  | 64.605   |
| 2     | 35.224    | 1391532  | 9096   | 13.096  | 12.025   |
| 3     | 44.476    | 3693937  | 15876  | 34.763  | 20.987   |
| 4     | 66.658    | 753257   | 1803   | 7.089   | 2.384    |
| Total |           | 10626004 | 75646  | 100.000 | 100.000  |

## HPLC chromatogram of compound 6 (Catalyst 3I)

D:\...\Substituted Benzofuranone+Acetyl pyridine Chalcone\chalcone\SMR chalcone(rac,RT,20 IPA,1ML,phox).lcd

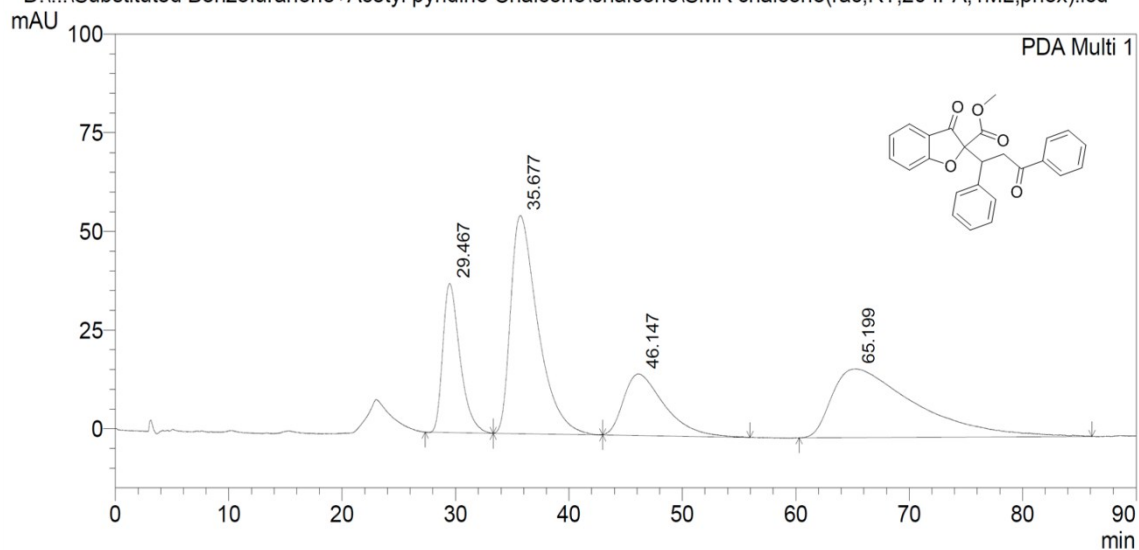

PeakTable

PDA Ch1 254nm 4nm

| Peak# | Ret. Time | Area     | Height | Area %  | Height % |
|-------|-----------|----------|--------|---------|----------|
| 1     | 29.467    | 3995415  | 37825  | 15.308  | 29.966   |
| 2     | 35.677    | 9258021  | 55293  | 35.472  | 43.803   |
| 3     | 46.147    | 3915771  | 15655  | 15.003  | 12.402   |
| 4     | 65.199    | 8930508  | 17456  | 34.217  | 13.829   |
| Total |           | 26099714 | 126229 | 100.000 | 100.000  |

D:\...\chalcone\SMR chalcone(Bis SQU QN,RT,20 IPA,1ML,phox).lcd

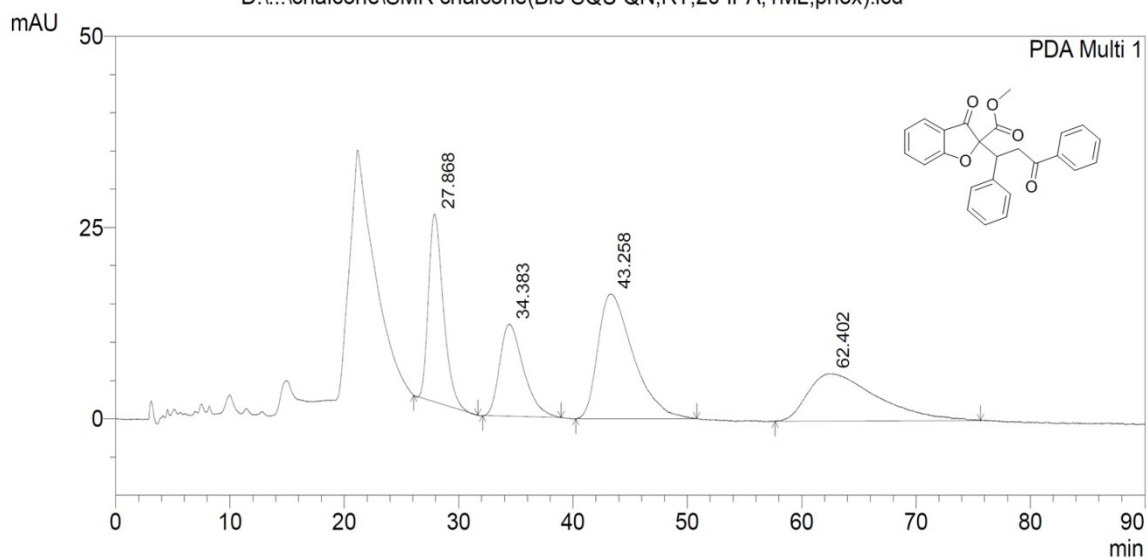

PeakTable

PDA Ch1 254nm 4nm

| Peak# | Ret. Time | Area     | Height | Area %  | Height % |
|-------|-----------|----------|--------|---------|----------|
| 1     | 27.868    | 2217423  | 24501  | 21.967  | 41.481   |
| 2     | 34.383    | 1742135  | 12018  | 17.259  | 20.346   |
| 3     | 43.258    | 3505572  | 16302  | 34.729  | 27.599   |
| 4     | 62.402    | 2629059  | 6246   | 26.045  | 10.574   |
| Total |           | 10094189 | 59066  | 100.000 | 100.000  |

## HPLC chromatogram of compound 8 (Catalyst 3k)

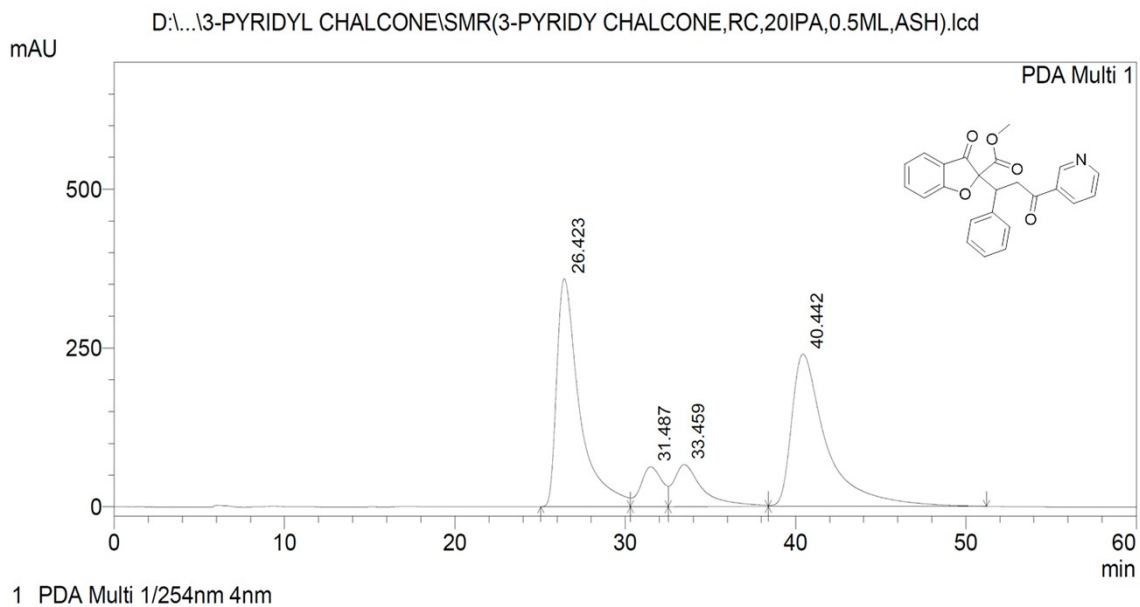

PeakTable

PDA Ch1 254nm 4nm

| Peak# | Ret. Time | Area     | Height | Area %  | Height % |
|-------|-----------|----------|--------|---------|----------|
| 1     | 26.423    | 33509147 | 358918 | 41.273  | 49.320   |
| 2     | 31.487    | 5462144  | 62675  | 6.728   | 8.612    |
| 3     | 33.459    | 7850416  | 66211  | 9.669   | 9.098    |
| 4     | 40.442    | 34368065 | 239932 | 42.331  | 32.970   |
| Total |           | 81189773 | 727736 | 100.000 | 100.000  |

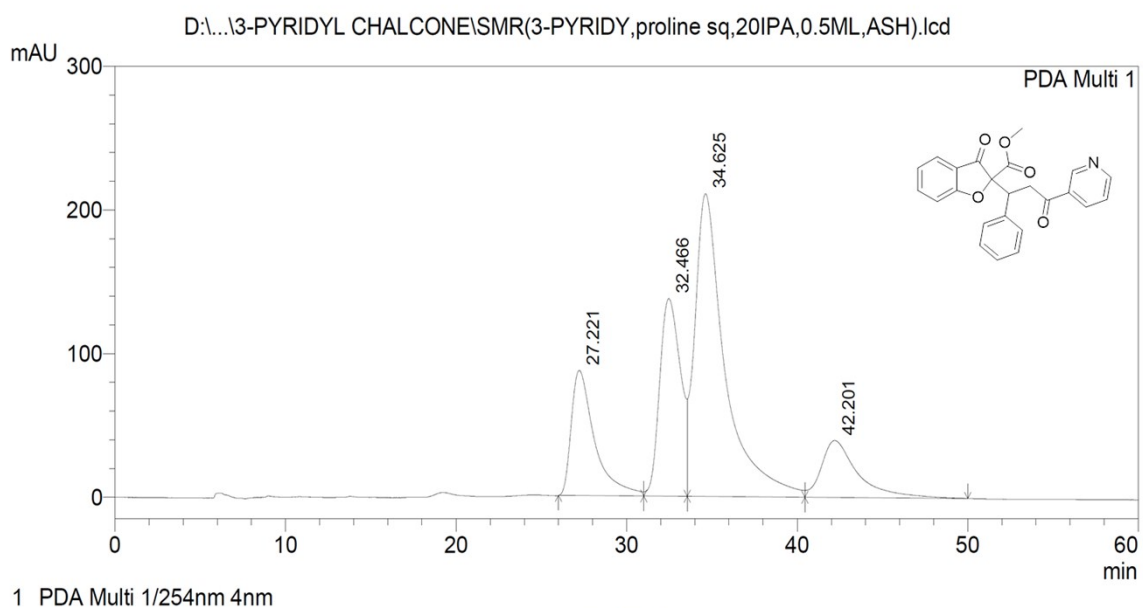

PeakTable

PDA Ch1 254nm 4nm

| Peak# | Ret. Time | Area     | Height | Area %  | Height % |
|-------|-----------|----------|--------|---------|----------|
| 1     | 27.221    | 8306244  | 87184  | 15.987  | 18.346   |
| 2     | 32.466    | 11754501 | 137570 | 22.624  | 28.949   |
| 3     | 34.625    | 25992152 | 210778 | 50.026  | 44.355   |
| 4     | 42.201    | 5903987  | 39678  | 11.363  | 8.350    |
| Total |           | 51956884 | 475210 | 100.000 | 100.000  |

## HPLC chromatogram of compound 8 (Catalyst 3l)

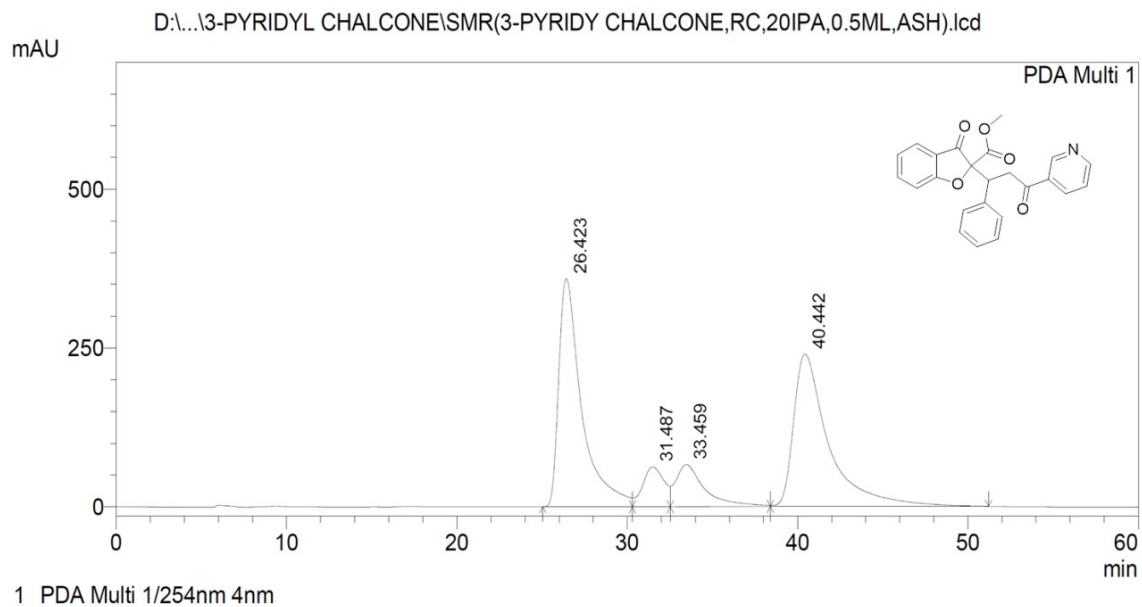

PeakTable

PDA Ch1 254nm 4nm

| Peak# | Ret. Time | Area     | Height | Area %  | Height % |
|-------|-----------|----------|--------|---------|----------|
| 1     | 26.423    | 33509147 | 358918 | 41.273  | 49.320   |
| 2     | 31.487    | 5462144  | 62675  | 6.728   | 8.612    |
| 3     | 33.459    | 7850416  | 66211  | 9.669   | 9.098    |
| 4     | 40.442    | 34368065 | 239932 | 42.331  | 32.970   |
| Total |           | 81189773 | 727736 | 100.000 | 100.000  |

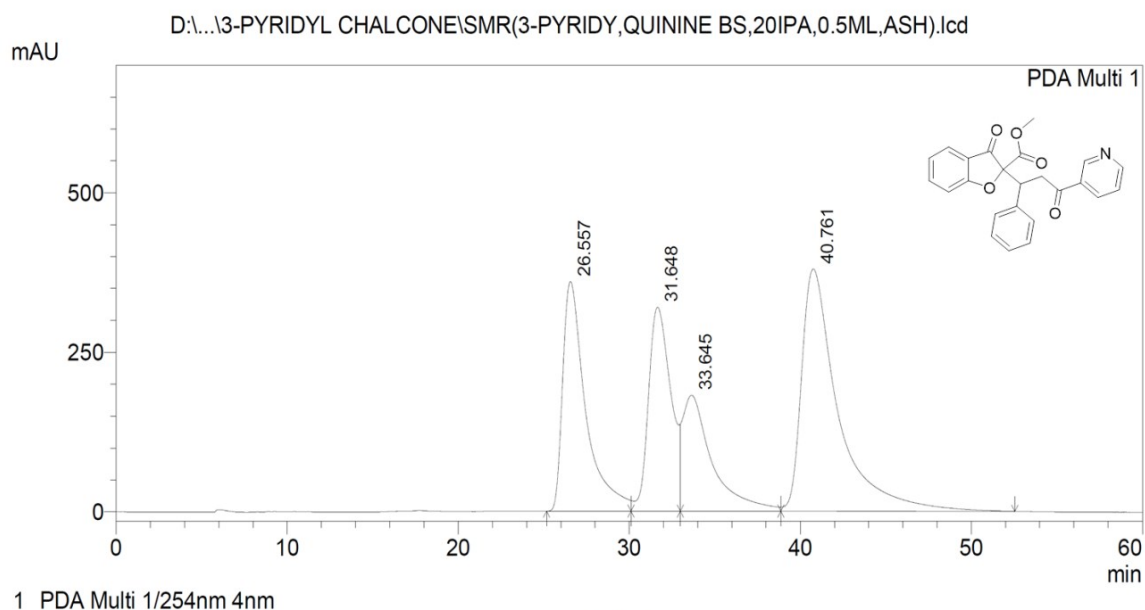

PeakTable

PDA Ch1 254nm 4nm

| Peak# | Ret. Time | Area      | Height  | Area %  | Height % |
|-------|-----------|-----------|---------|---------|----------|
| 1     | 26.557    | 33702417  | 359890  | 23.869  | 28.992   |
| 2     | 31.648    | 29193132  | 319759  | 20.676  | 25.759   |
| 3     | 33.645    | 21905059  | 181856  | 15.514  | 14.650   |
| 4     | 40.761    | 56395730  | 379827  | 39.941  | 30.598   |
| Total |           | 141196338 | 1241333 | 100.000 | 100.000  |

## 11. Catalyst Screening

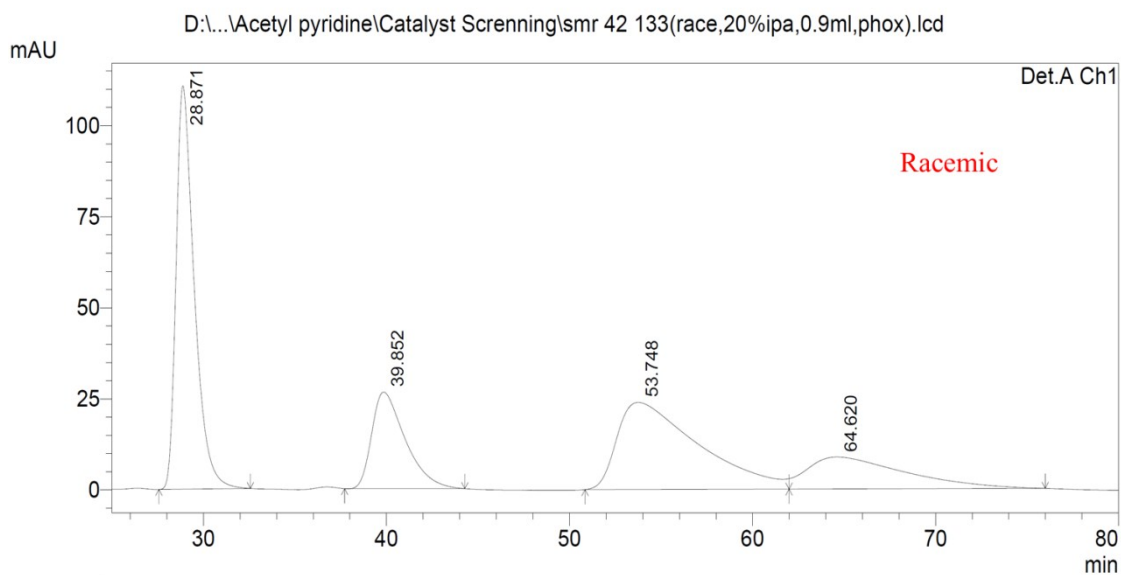

PeakTable

| Detector A Ch1 272nm |           |          |        |         |          |
|----------------------|-----------|----------|--------|---------|----------|
| Peak#                | Ret. Time | Area     | Height | Area %  | Height % |
| 1                    | 28.871    | 7642713  | 110777 | 35.269  | 65.167   |
| 2                    | 39.852    | 3375227  | 26534  | 15.576  | 15.609   |
| 3                    | 53.748    | 7391460  | 23911  | 34.110  | 14.066   |
| 4                    | 64.620    | 3260180  | 8767   | 15.045  | 5.157    |
| Total                |           | 21669581 | 169990 | 100.000 | 100.000  |

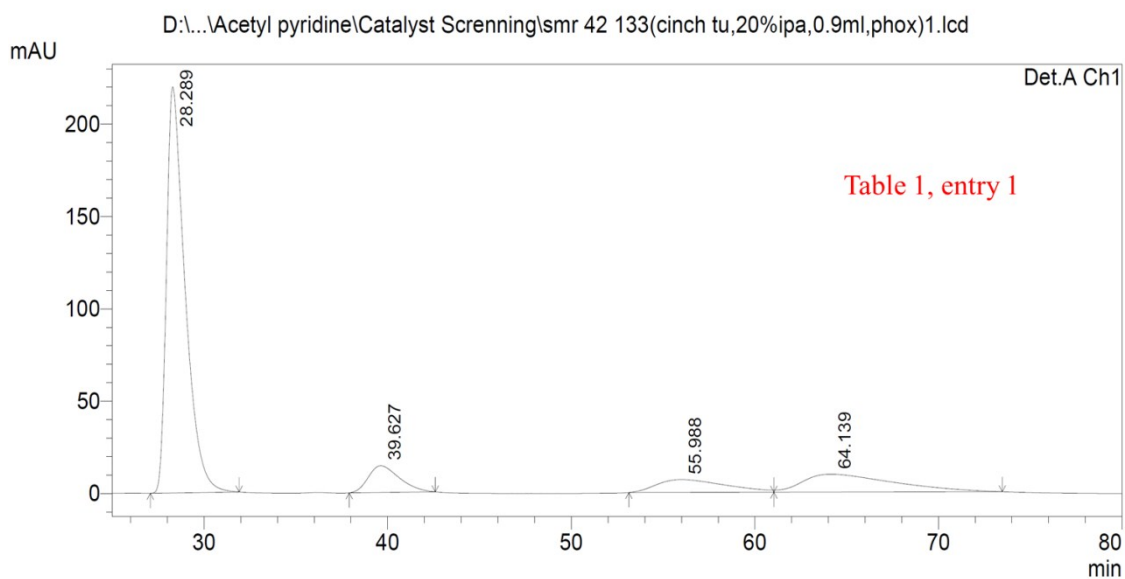

PeakTable

| Detector A Ch1 272nm |           |          |        |         |          |
|----------------------|-----------|----------|--------|---------|----------|
| Peak#                | Ret. Time | Area     | Height | Area %  | Height % |
| 1                    | 28.289    | 15434505 | 219890 | 69.149  | 87.597   |
| 2                    | 39.627    | 1706607  | 14460  | 7.646   | 5.760    |
| 3                    | 55.988    | 1819204  | 6952   | 8.150   | 2.769    |
| 4                    | 64.139    | 3360396  | 9723   | 15.055  | 3.873    |
| Total                |           | 22320713 | 251025 | 100.000 | 100.000  |

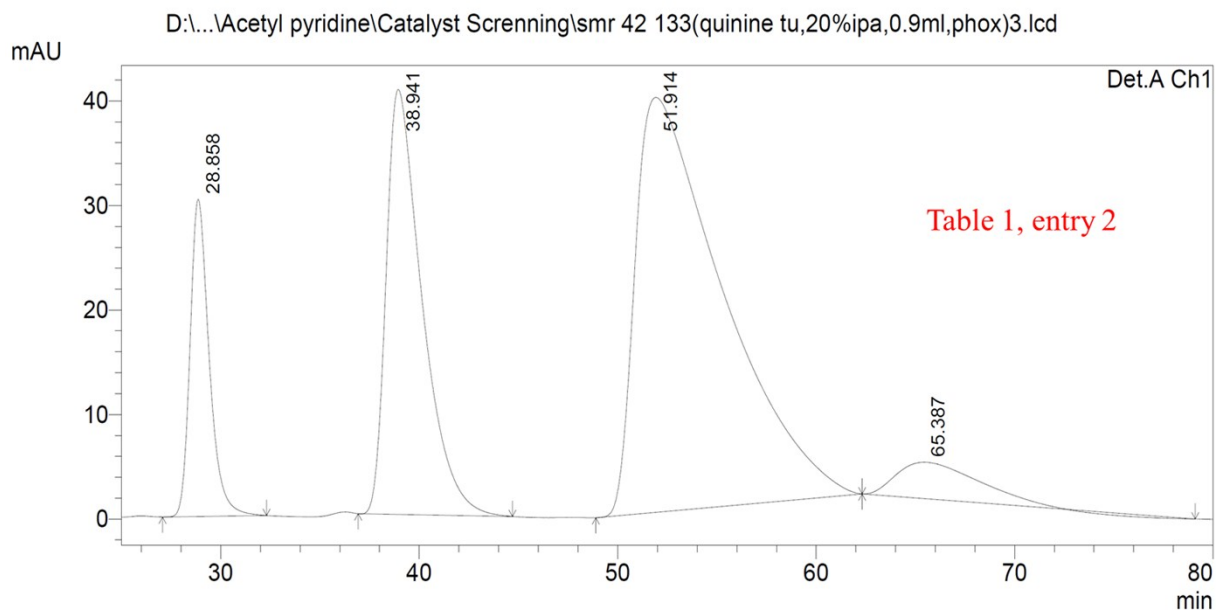

PeakTable

Detector A Ch1 272nm

| Peak# | Ret. Time | Area     | Height | Area %  | Height % |
|-------|-----------|----------|--------|---------|----------|
| 1     | 28.858    | 2036152  | 30340  | 10.012  | 26.576   |
| 2     | 38.941    | 5124526  | 40653  | 25.199  | 35.610   |
| 3     | 51.914    | 12200250 | 39698  | 59.992  | 34.773   |
| 4     | 65.387    | 975494   | 3472   | 4.797   | 3.042    |
| Total |           | 20336422 | 114163 | 100.000 | 100.000  |

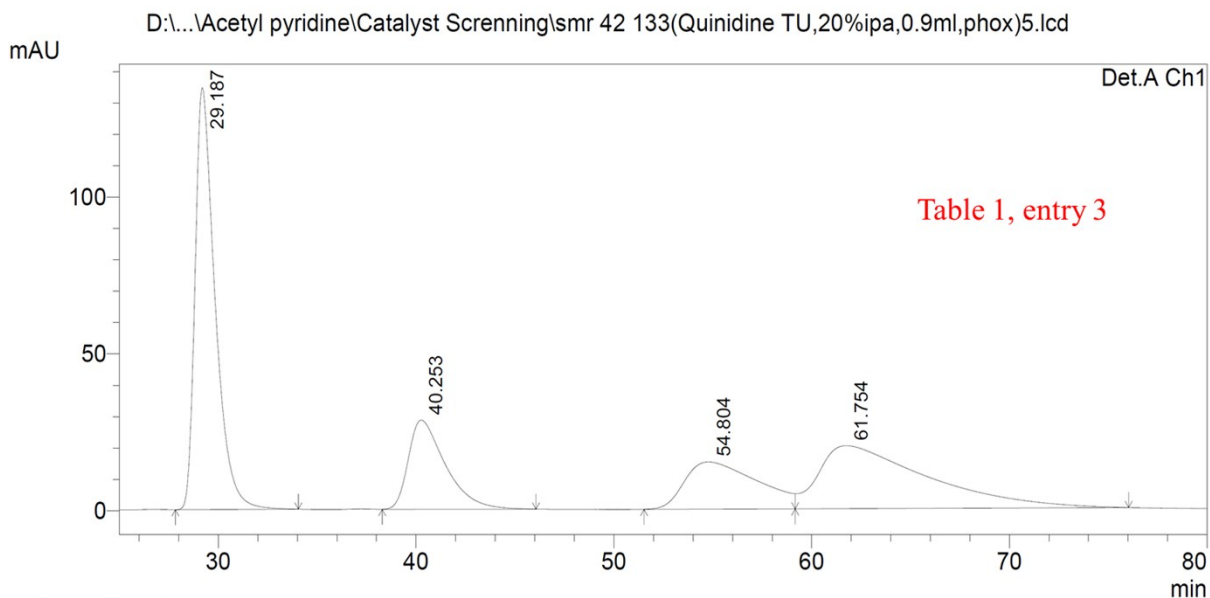

PeakTable

Detector A Ch1 272nm

| Peak# | Ret. Time | Area     | Height | Area %  | Height % |
|-------|-----------|----------|--------|---------|----------|
| 1     | 29.187    | 9457977  | 134536 | 38.298  | 67.902   |
| 2     | 40.253    | 3694914  | 28445  | 14.962  | 14.357   |
| 3     | 54.804    | 3855811  | 15060  | 15.613  | 7.601    |
| 4     | 61.754    | 7687068  | 20090  | 31.127  | 10.140   |
| Total |           | 24695770 | 198132 | 100.000 | 100.000  |

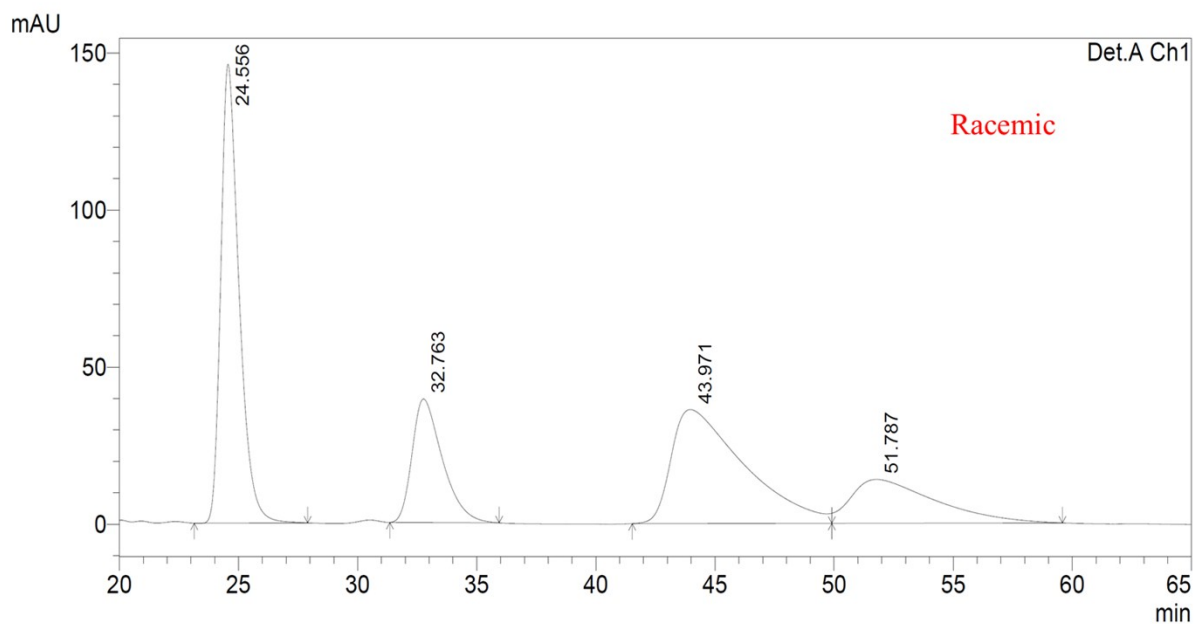

1 Det.A Ch1/272nm

PeakTable

Detector A Ch1 272nm

| Peak# | Ret. Time | Area     | Height | Area %  | Height % |
|-------|-----------|----------|--------|---------|----------|
| 1     | 24.556    | 7783178  | 146084 | 34.736  | 61.995   |
| 2     | 32.763    | 3478999  | 39342  | 15.526  | 16.696   |
| 3     | 43.971    | 7712875  | 36267  | 34.422  | 15.391   |
| 4     | 51.787    | 3431833  | 13944  | 15.316  | 5.918    |
| Total |           | 22406885 | 235637 | 100.000 | 100.000  |

D:\...\Acetyl pyridine\Catalyst Screening\smr 42 133(taki pip TU,20%ipa,0.9ml,phox)9.lcd

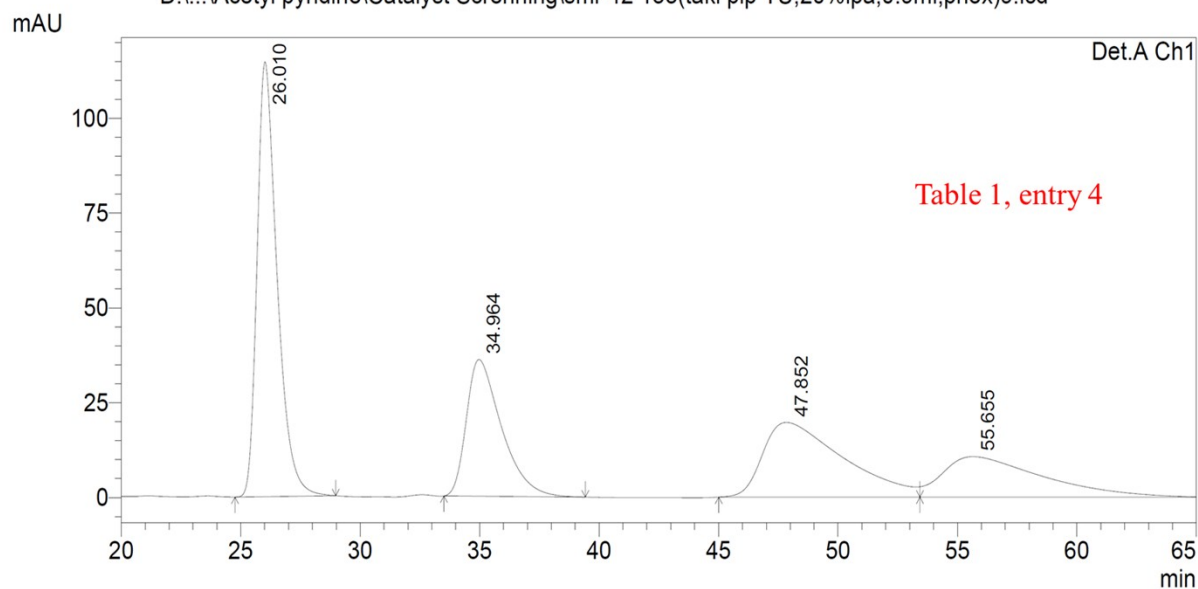

1 Det.A Ch1/272nm

PeakTable

Detector A Ch1 272nm

| Peak# | Ret. Time | Area     | Height | Area %  | Height % |
|-------|-----------|----------|--------|---------|----------|
| 1     | 26.010    | 6685421  | 114618 | 36.961  | 63.309   |
| 2     | 34.964    | 3684362  | 36049  | 20.370  | 19.912   |
| 3     | 47.852    | 4612803  | 19693  | 25.503  | 10.877   |
| 4     | 55.655    | 3105043  | 10684  | 17.167  | 5.902    |
| Total |           | 18087629 | 181044 | 100.000 | 100.000  |

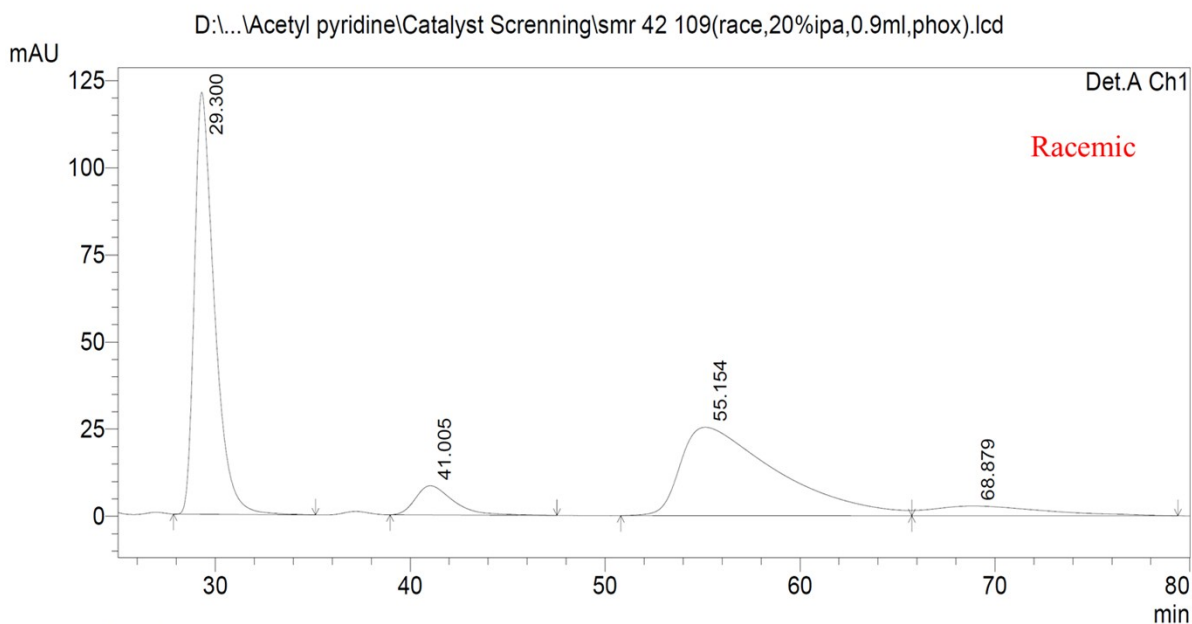

PeakTable

Detector A Ch1 272nm

| Peak# | Ret. Time | Area     | Height | Area %  | Height % |
|-------|-----------|----------|--------|---------|----------|
| 1     | 29.300    | 8650401  | 121088 | 44.004  | 76.822   |
| 2     | 41.005    | 1131997  | 8371   | 5.758   | 5.311    |
| 3     | 55.154    | 8742573  | 25367  | 44.473  | 16.093   |
| 4     | 68.879    | 1133062  | 2795   | 5.764   | 1.773    |
| Total |           | 19658033 | 157621 | 100.000 | 100.000  |

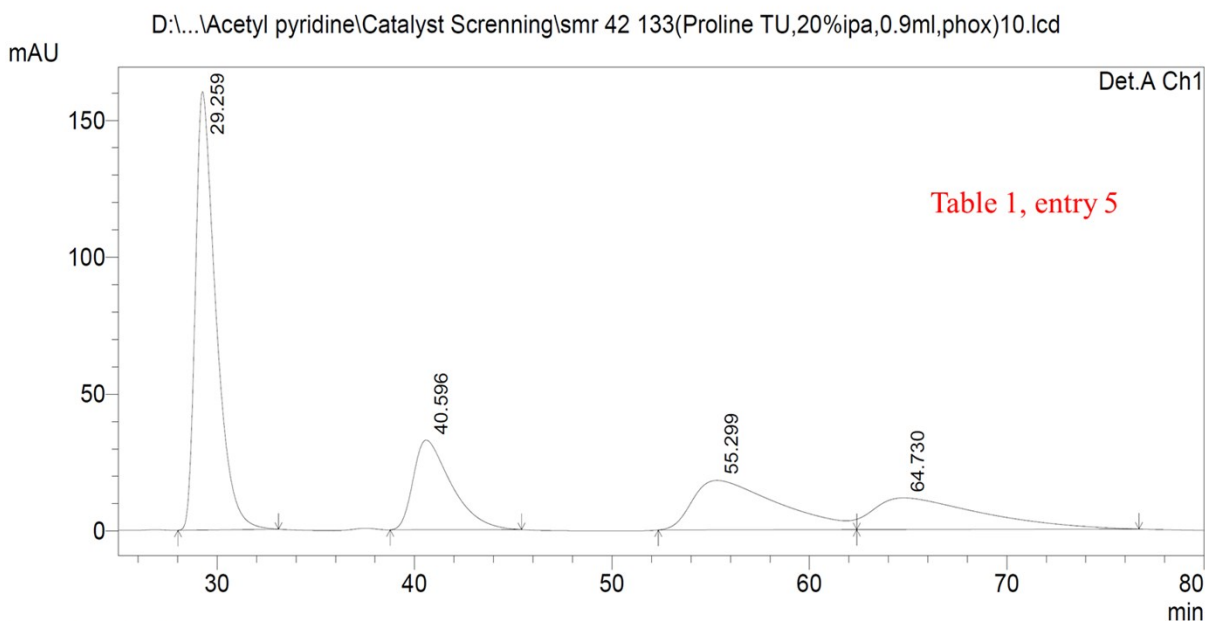

PeakTable

Detector A Ch1 272nm

| Peak# | Ret. Time | Area     | Height | Area %  | Height % |
|-------|-----------|----------|--------|---------|----------|
| 1     | 29.259    | 11557092 | 160139 | 44.664  | 71.964   |
| 2     | 40.596    | 4391703  | 32766  | 16.972  | 14.725   |
| 3     | 55.299    | 5520497  | 18065  | 21.335  | 8.118    |
| 4     | 64.730    | 4406139  | 11556  | 17.028  | 5.193    |
| Total |           | 25875431 | 222527 | 100.000 | 100.000  |

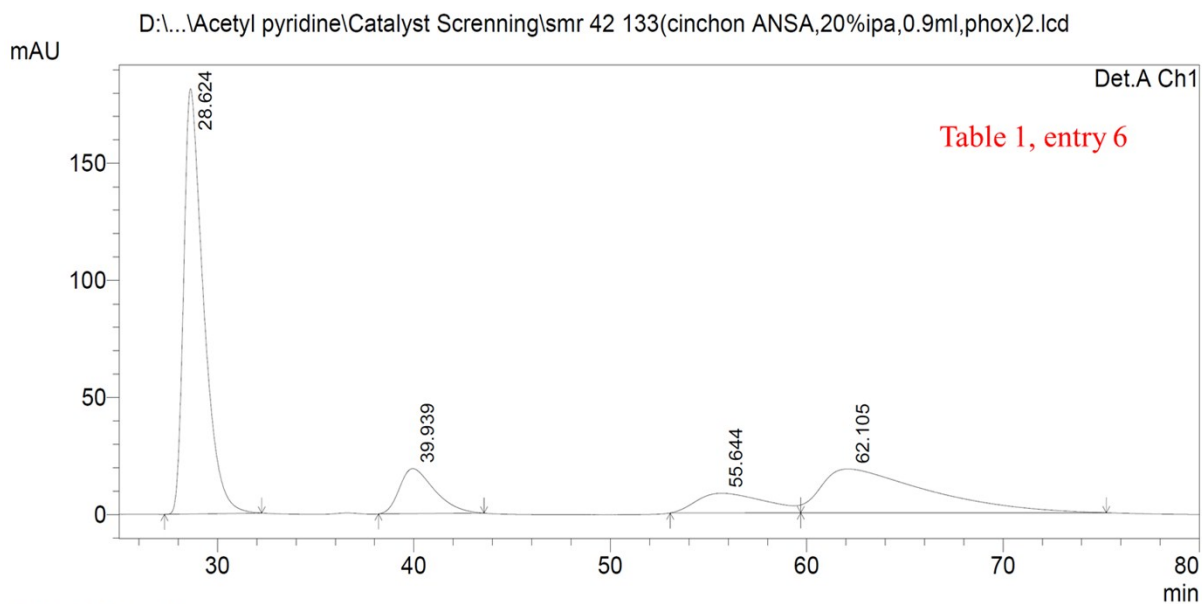

1 Det.A Ch1/272nm

PeakTable

Detector A Ch1 272nm

| Peak# | Ret. Time | Area     | Height | Area %  | Height % |
|-------|-----------|----------|--------|---------|----------|
| 1     | 28.624    | 12734800 | 181593 | 52.453  | 79.660   |
| 2     | 39.939    | 2382549  | 19244  | 9.813   | 8.442    |
| 3     | 55.644    | 2071724  | 8385   | 8.533   | 3.678    |
| 4     | 62.105    | 7089272  | 18737  | 29.200  | 8.219    |
| Total |           | 24278346 | 227958 | 100.000 | 100.000  |

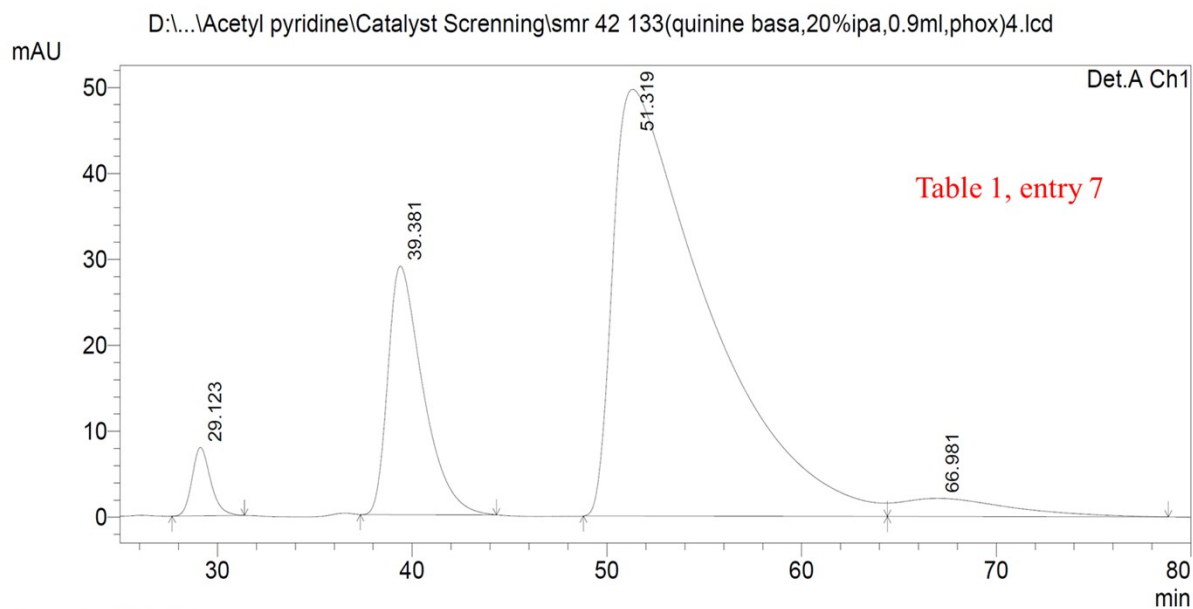

1 Det.A Ch1/272nm

PeakTable

Detector A Ch1 272nm

| Peak# | Ret. Time | Area     | Height | Area %  | Height % |
|-------|-----------|----------|--------|---------|----------|
| 1     | 29.123    | 530491   | 7975   | 2.424   | 8.992    |
| 2     | 39.381    | 3627936  | 28929  | 16.578  | 32.620   |
| 3     | 51.319    | 16883183 | 49654  | 77.147  | 55.991   |
| 4     | 66.981    | 842950   | 2126   | 3.852   | 2.397    |
| Total |           | 21884560 | 88683  | 100.000 | 100.000  |

D:\...\Acetyl pyridine\Catalyst Screnning\smr 42 133(Quinidine BASA,20%ipa,0.9ml,phox)6.lcd

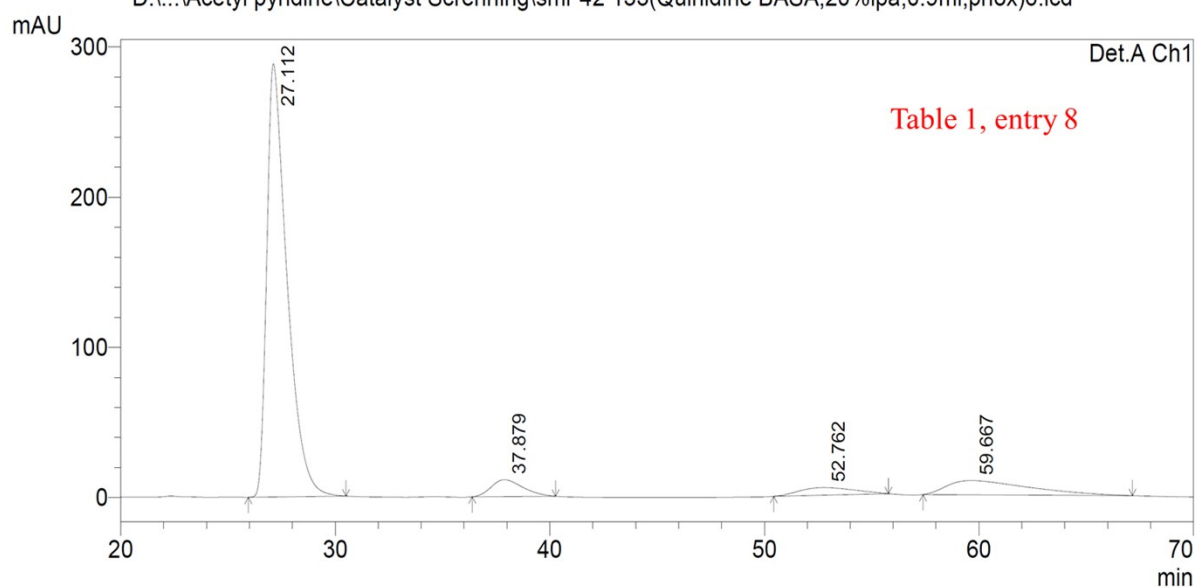

1 Det.A Ch1/272nm

PeakTable

Detector A Ch1 272nm

| Peak# | Ret. Time | Area     | Height | Area %  | Height % |
|-------|-----------|----------|--------|---------|----------|
| 1     | 27.112    | 18885079 | 288532 | 80.490  | 91.807   |
| 2     | 37.879    | 1148317  | 11242  | 4.894   | 3.577    |
| 3     | 52.762    | 889068   | 5048   | 3.789   | 1.606    |
| 4     | 59.667    | 2540160  | 9459   | 10.826  | 3.010    |
| Total |           | 23462624 | 314281 | 100.000 | 100.000  |

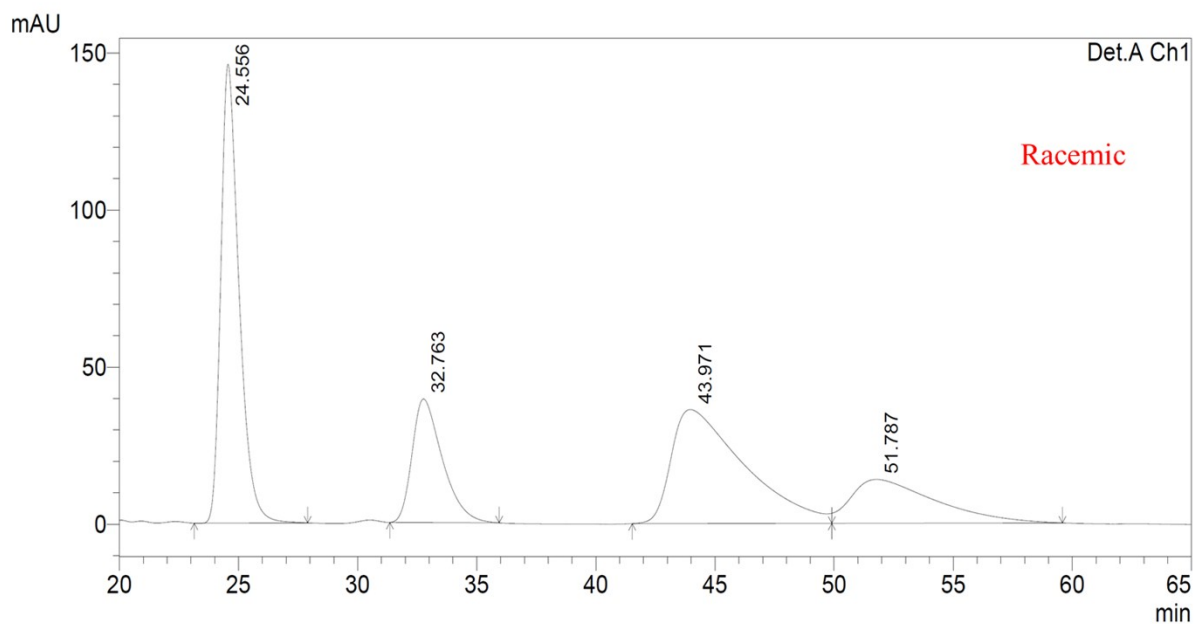

1 Det.A Ch1/272nm

PeakTable

Detector A Ch1 272nm

| Peak# | Ret. Time | Area     | Height | Area %  | Height % |
|-------|-----------|----------|--------|---------|----------|
| 1     | 24.556    | 7783178  | 146084 | 34.736  | 61.995   |
| 2     | 32.763    | 3478999  | 39342  | 15.526  | 16.696   |
| 3     | 43.971    | 7712875  | 36267  | 34.422  | 15.391   |
| 4     | 51.787    | 3431833  | 13944  | 15.316  | 5.918    |
| Total |           | 22406885 | 235637 | 100.000 | 100.000  |

D:\...\Acetyl pyridine\Catalyst Screening\smr 42 133(takimoto ANSA,20%ipa,0.9ml,phox)7.lcd

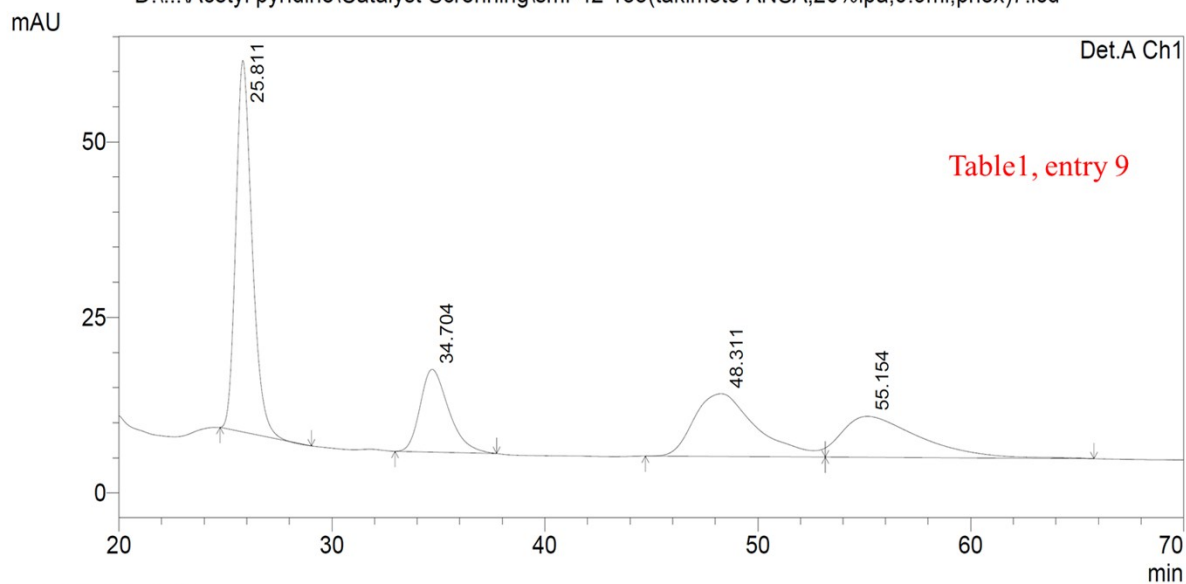

1 Det.A Ch1/272nm

PeakTable

Detector A Ch1 272nm

| Peak# | Ret. Time | Area    | Height | Area %  | Height % |
|-------|-----------|---------|--------|---------|----------|
| 1     | 25.811    | 2817471 | 52925  | 38.991  | 66.568   |
| 2     | 34.704    | 1103164 | 11792  | 15.267  | 14.831   |
| 3     | 48.311    | 1823575 | 8945   | 25.236  | 11.251   |
| 4     | 55.154    | 1481752 | 5844   | 20.506  | 7.350    |
| Total |           | 7225962 | 79505  | 100.000 | 100.000  |

D:\...\Acetyl pyridine\Catalyst Screening\smr 42 133(Takipip BASA,20%ipa,0.9ml,phox)8.lcd

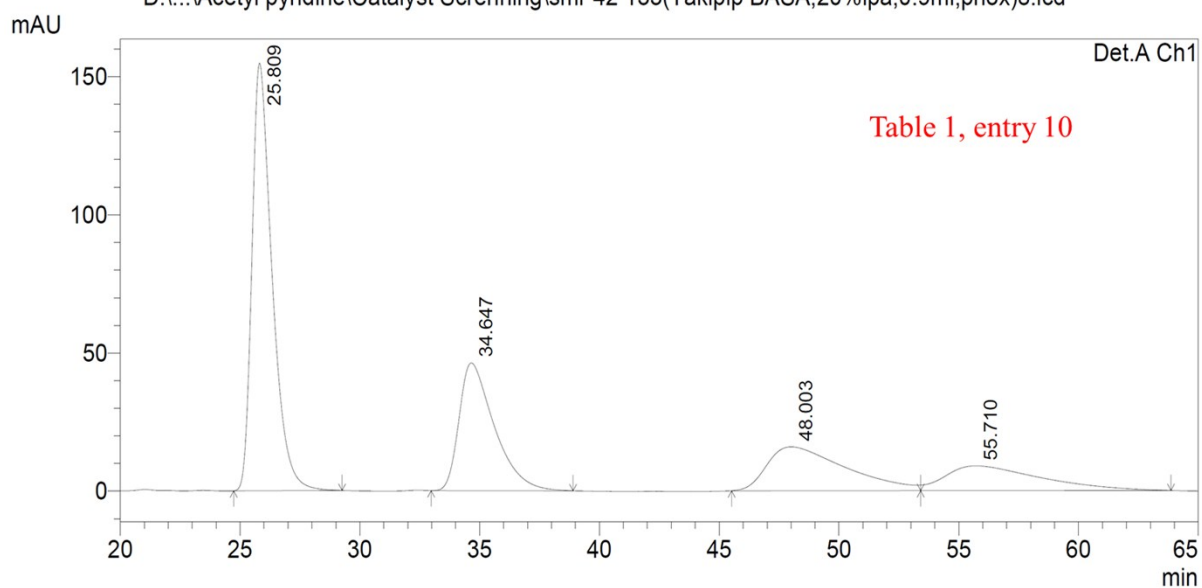

1 Det.A Ch1/272nm

PeakTable

Detector A Ch1 272nm

| Peak# | Ret. Time | Area     | Height | Area %  | Height % |
|-------|-----------|----------|--------|---------|----------|
| 1     | 25.809    | 9046705  | 154732 | 45.523  | 68.516   |
| 2     | 34.647    | 4725136  | 46240  | 23.777  | 20.475   |
| 3     | 48.003    | 3618775  | 15886  | 18.210  | 7.034    |
| 4     | 55.710    | 2482282  | 8975   | 12.491  | 3.974    |
| Total |           | 19872897 | 225834 | 100.000 | 100.000  |

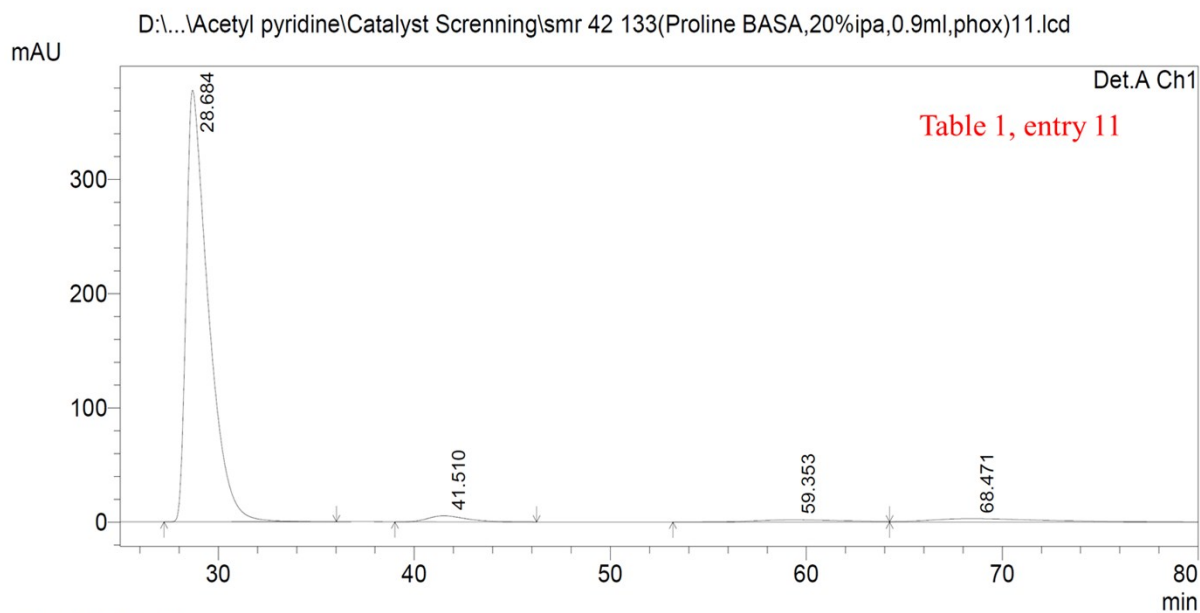

1 Det.A Ch1/272nm

PeakTable

| Peak# | Ret. Time | Area     | Height | Area %  | Height % |
|-------|-----------|----------|--------|---------|----------|
| 1     | 28.684    | 29577640 | 377875 | 92.153  | 97.367   |
| 2     | 41.510    | 734702   | 5367   | 2.289   | 1.383    |
| 3     | 59.353    | 590427   | 1889   | 1.840   | 0.487    |
| 4     | 68.471    | 1193305  | 2961   | 3.718   | 0.763    |
| Total |           | 32096075 | 388092 | 100.000 | 100.000  |

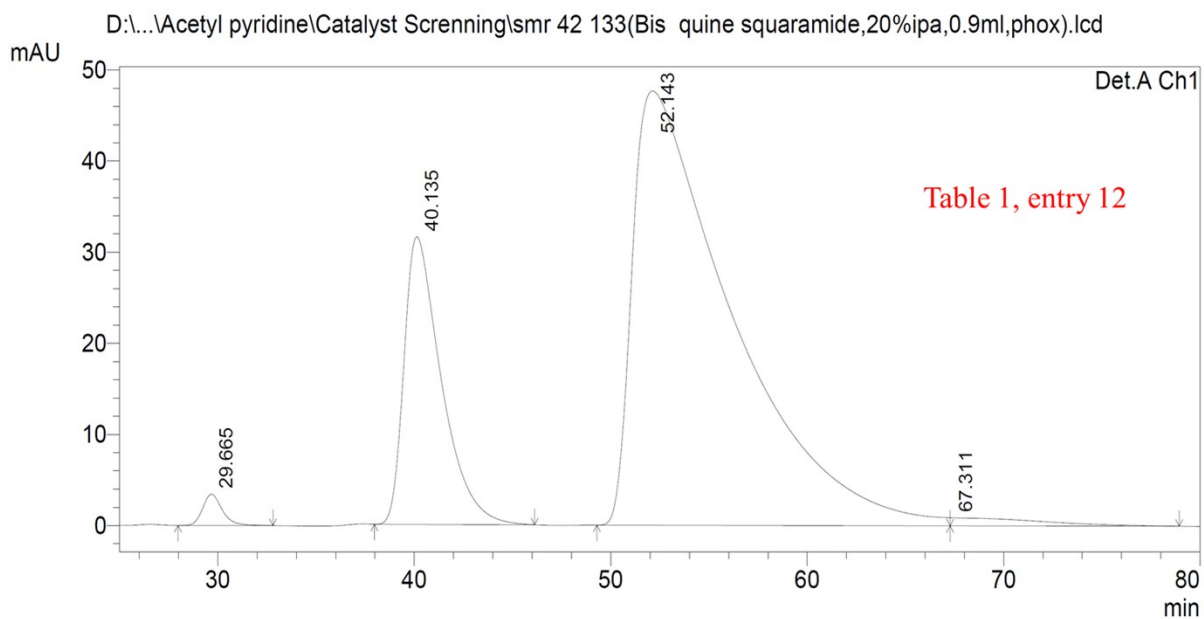

1 Det.A Ch1/272nm

PeakTable

| Peak# | Ret. Time | Area     | Height | Area %  | Height % |
|-------|-----------|----------|--------|---------|----------|
| 1     | 29.665    | 238303   | 3433   | 1.110   | 4.109    |
| 2     | 40.135    | 4172825  | 31575  | 19.442  | 37.783   |
| 3     | 52.143    | 16771578 | 47673  | 78.140  | 57.047   |
| 4     | 67.311    | 280666   | 887    | 1.308   | 1.061    |
| Total |           | 21463371 | 83568  | 100.000 | 100.000  |

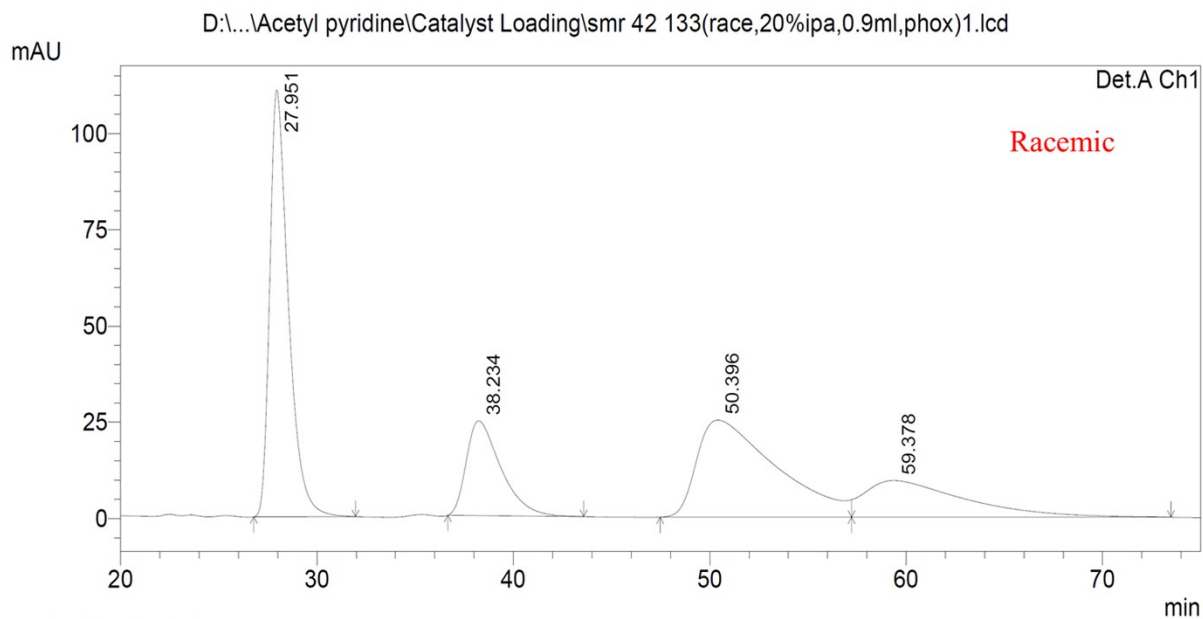

PeakTable

| Peak# | Ret. Time | Area     | Height | Area %  | Height % |
|-------|-----------|----------|--------|---------|----------|
| 1     | 27.951    | 7348053  | 110921 | 35.353  | 65.141   |
| 2     | 38.234    | 3012668  | 24632  | 14.495  | 14.466   |
| 3     | 50.396    | 7067816  | 25209  | 34.005  | 14.805   |
| 4     | 59.378    | 3356238  | 9516   | 16.148  | 5.588    |
| Total |           | 20784774 | 170278 | 100.000 | 100.000  |

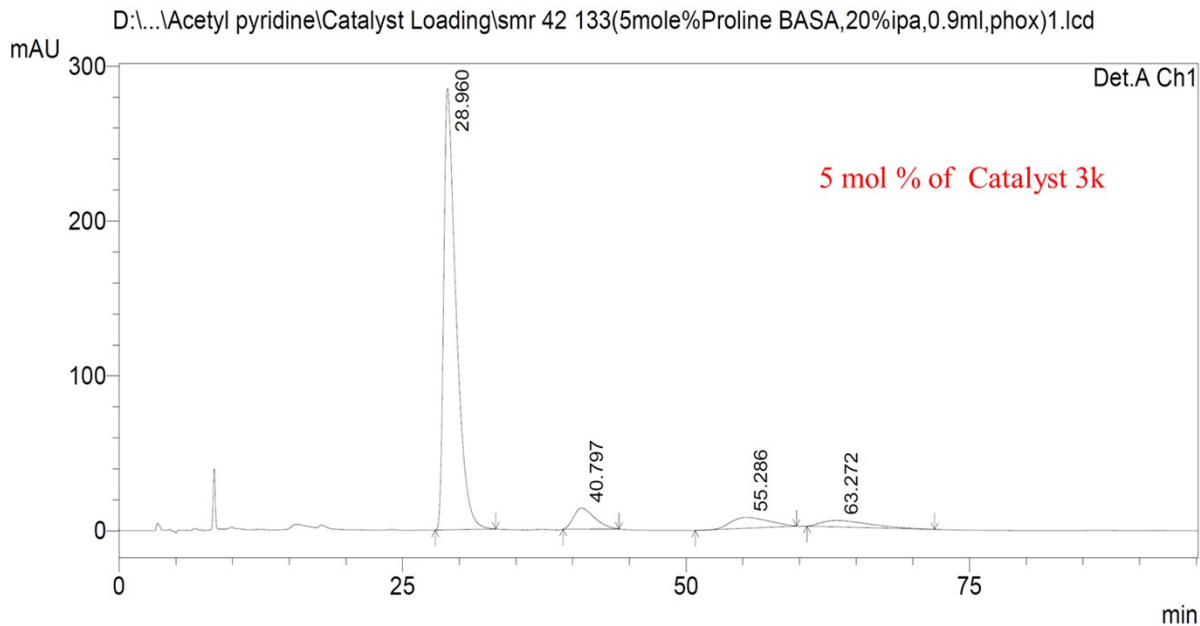

PeakTable

| Peak# | Ret. Time | Area     | Height | Area %  | Height % |
|-------|-----------|----------|--------|---------|----------|
| 1     | 28.960    | 21606997 | 285169 | 82.456  | 92.033   |
| 2     | 40.797    | 1754718  | 13587  | 6.696   | 4.385    |
| 3     | 55.286    | 1599092  | 6950   | 6.102   | 2.243    |
| 4     | 63.272    | 1243588  | 4149   | 4.746   | 1.339    |
| Total |           | 26204395 | 309854 | 100.000 | 100.000  |

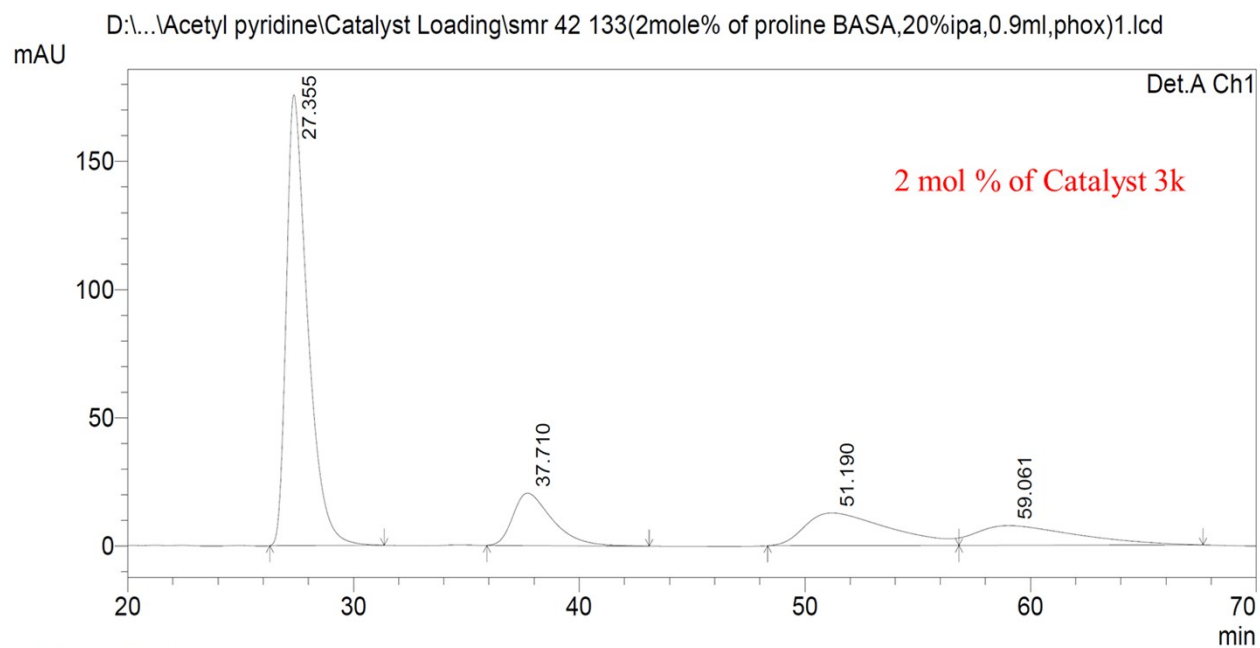

1 Det.A Ch1/272nm

PeakTable

Detector A Ch1 272nm

| Peak# | Ret. Time | Area     | Height | Area %  | Height % |
|-------|-----------|----------|--------|---------|----------|
| 1     | 27.355    | 11528933 | 175699 | 58.491  | 81.152   |
| 2     | 37.710    | 2463052  | 20425  | 12.496  | 9.434    |
| 3     | 51.190    | 3335845  | 12718  | 16.924  | 5.874    |
| 4     | 59.061    | 2382779  | 7666   | 12.089  | 3.541    |
| Total |           | 19710608 | 216507 | 100.000 | 100.000  |

## 12. Solvent Screening

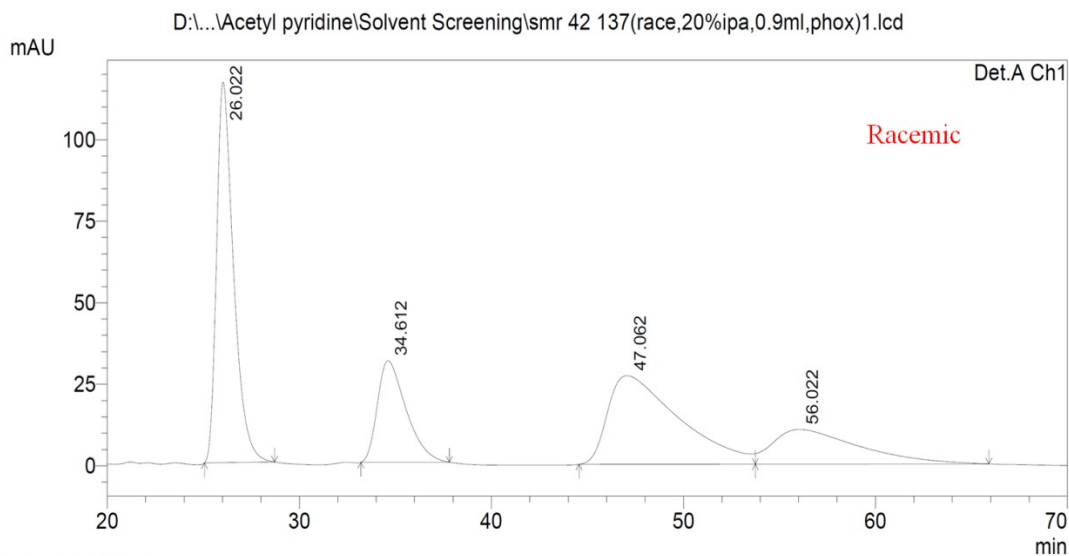

PeakTable

| Peak# | Ret. Time | Area     | Height | Area %  | Height % |
|-------|-----------|----------|--------|---------|----------|
| 1     | 26.022    | 7170989  | 116738 | 34.573  | 62.854   |
| 2     | 34.612    | 3233733  | 31167  | 15.591  | 16.781   |
| 3     | 47.062    | 7008529  | 27200  | 33.790  | 14.645   |
| 4     | 56.022    | 3328331  | 10625  | 16.047  | 5.720    |
| Total |           | 20741581 | 185730 | 100.000 | 100.000  |

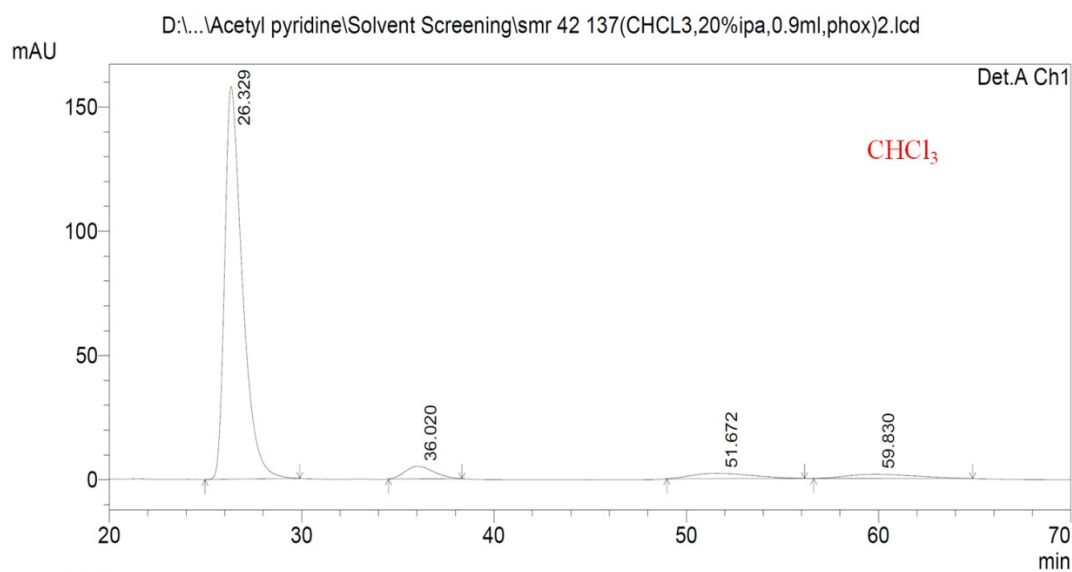

PeakTable

| Peak# | Ret. Time | Area     | Height | Area %  | Height % |
|-------|-----------|----------|--------|---------|----------|
| 1     | 26.329    | 10114934 | 158022 | 87.547  | 94.655   |
| 2     | 36.020    | 529626   | 5091   | 4.584   | 3.050    |
| 3     | 51.672    | 473612   | 2126   | 4.099   | 1.274    |
| 4     | 59.830    | 435612   | 1705   | 3.770   | 1.022    |
| Total |           | 11553783 | 166944 | 100.000 | 100.000  |

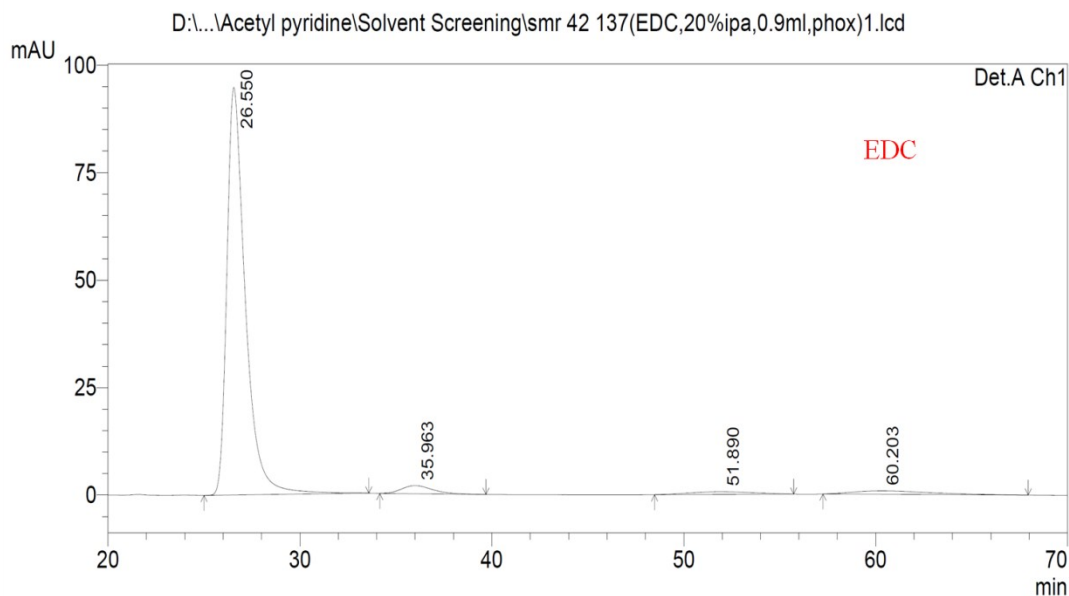

1 Det.A Ch1/272nm

PeakTable

Detector A Ch1 272nm

| Peak# | Ret. Time | Area    | Height | Area %  | Height % |
|-------|-----------|---------|--------|---------|----------|
| 1     | 26.550    | 6339858 | 94787  | 91.502  | 96.588   |
| 2     | 35.963    | 214925  | 1906   | 3.102   | 1.942    |
| 3     | 51.890    | 144550  | 639    | 2.086   | 0.651    |
| 4     | 60.203    | 229337  | 804    | 3.310   | 0.819    |
| Total |           | 6928670 | 98136  | 100.000 | 100.000  |

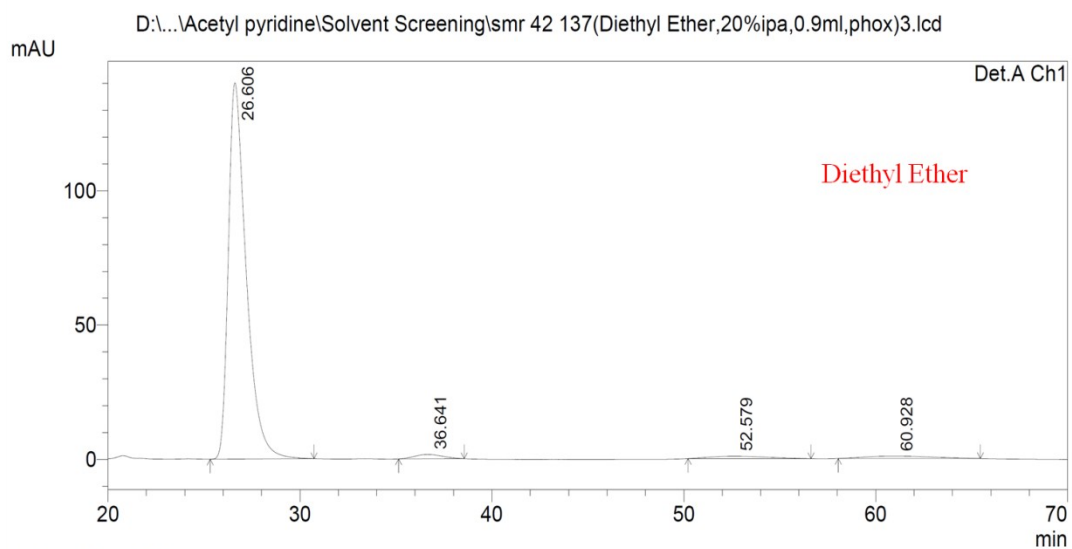

1 Det.A Ch1/272nm

PeakTable

Detector A Ch1 272nm

| Peak# | Ret. Time | Area    | Height | Area %  | Height % |
|-------|-----------|---------|--------|---------|----------|
| 1     | 26.606    | 9057349 | 140034 | 94.064  | 97.626   |
| 2     | 36.641    | 163798  | 1610   | 1.701   | 1.123    |
| 3     | 52.579    | 185303  | 879    | 1.924   | 0.613    |
| 4     | 60.928    | 222491  | 917    | 2.311   | 0.639    |
| Total |           | 9628940 | 143440 | 100.000 | 100.000  |

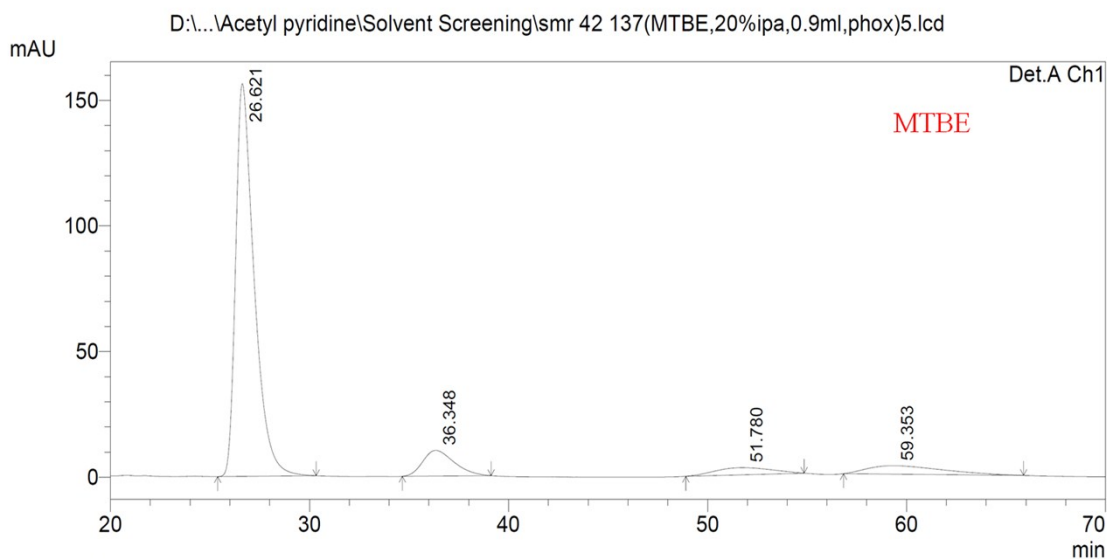

1 Det.A Ch1/272nm

PeakTable

Detector A Ch1 272nm

| Peak# | Ret. Time | Area     | Height | Area %  | Height % |
|-------|-----------|----------|--------|---------|----------|
| 1     | 26.621    | 10122361 | 156285 | 79.731  | 90.486   |
| 2     | 36.348    | 1119690  | 10223  | 8.819   | 5.919    |
| 3     | 51.780    | 558924   | 2839   | 4.402   | 1.644    |
| 4     | 59.353    | 894682   | 3370   | 7.047   | 1.951    |
| Total |           | 12695657 | 172716 | 100.000 | 100.000  |

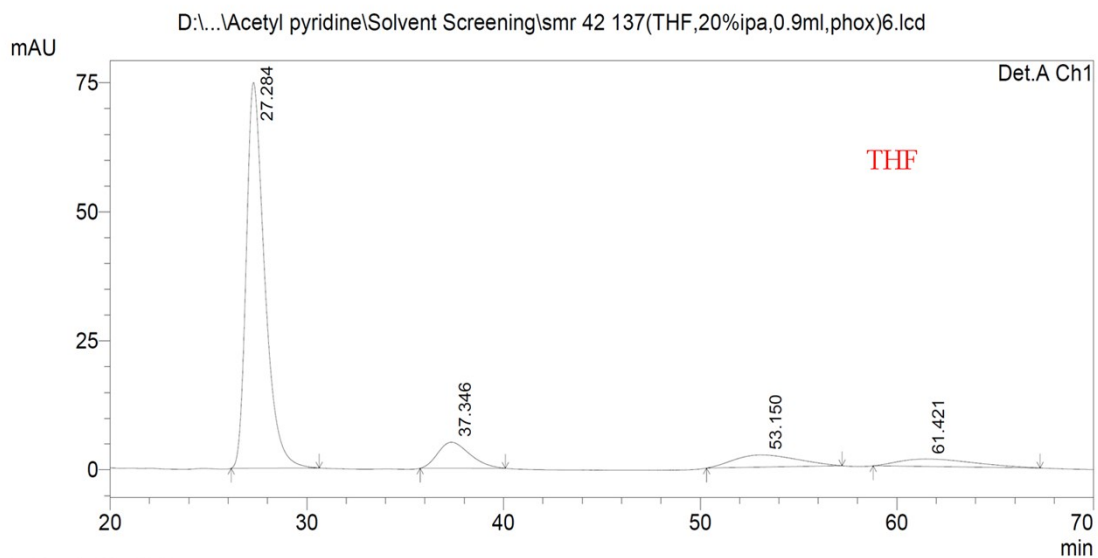

1 Det.A Ch1/272nm

PeakTable

Detector A Ch1 272nm

| Peak# | Ret. Time | Area    | Height | Area %  | Height % |
|-------|-----------|---------|--------|---------|----------|
| 1     | 27.284    | 4852966 | 74744  | 76.522  | 89.390   |
| 2     | 37.346    | 570414  | 5053   | 8.994   | 6.043    |
| 3     | 53.150    | 530010  | 2360   | 8.357   | 2.823    |
| 4     | 61.421    | 388559  | 1459   | 6.127   | 1.745    |
| Total |           | 6341949 | 83616  | 100.000 | 100.000  |

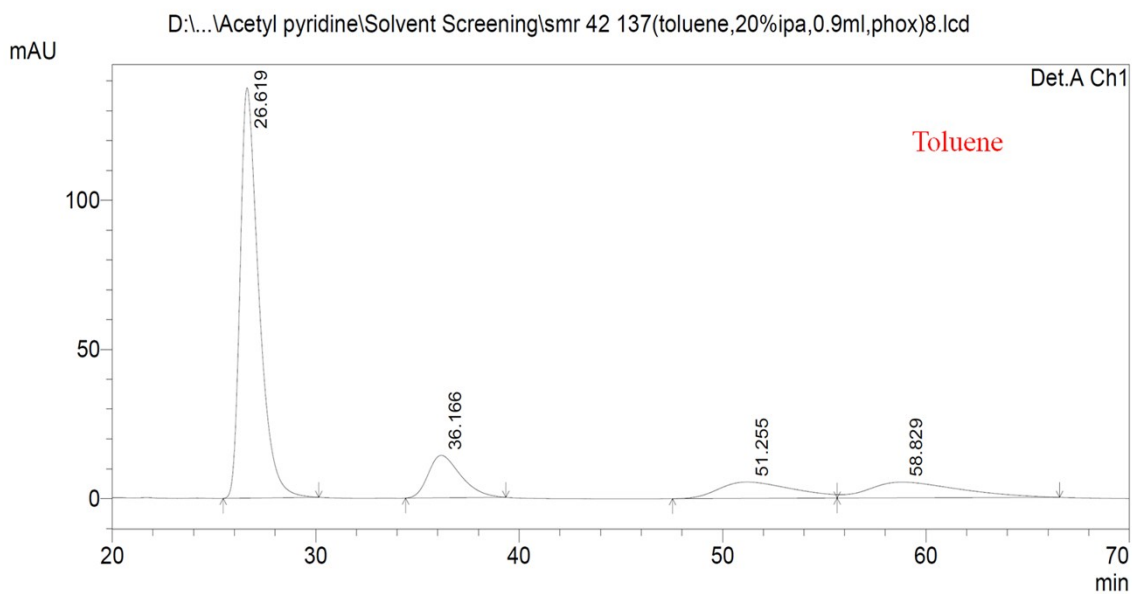

1 Det.A Ch1/272nm

PeakTable

Detector A Ch1 272nm

| Peak# | Ret. Time | Area     | Height | Area %  | Height % |
|-------|-----------|----------|--------|---------|----------|
| 1     | 26.619    | 8807638  | 137534 | 65.588  | 84.596   |
| 2     | 36.166    | 1582817  | 14248  | 11.787  | 8.764    |
| 3     | 51.255    | 1390077  | 5502   | 10.352  | 3.384    |
| 4     | 58.829    | 1648100  | 5294   | 12.273  | 3.256    |
| Total |           | 13428632 | 162578 | 100.000 | 100.000  |

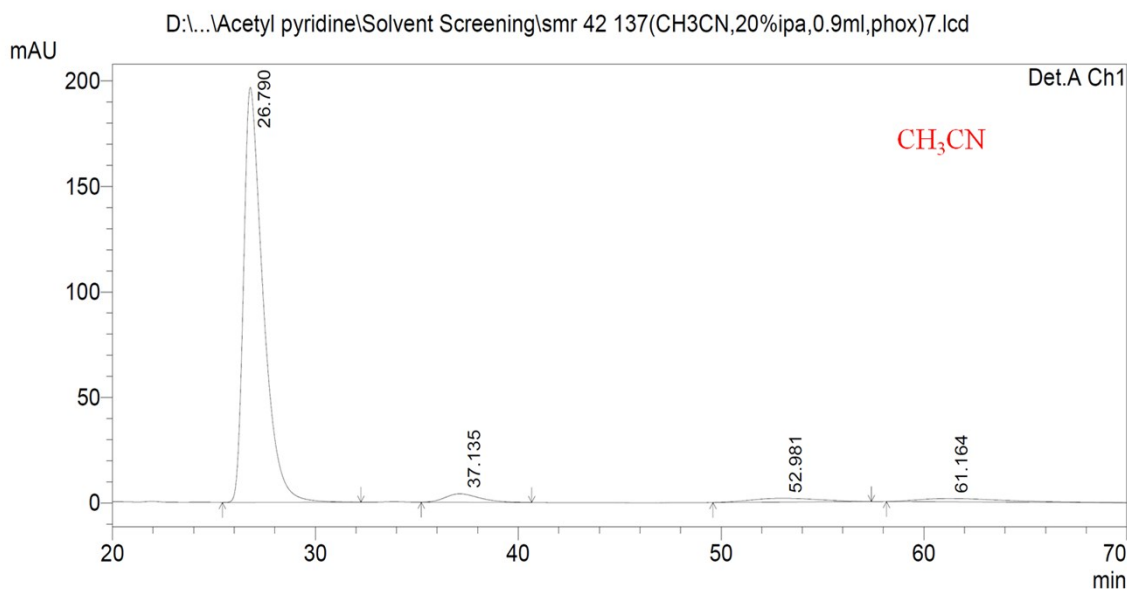

1 Det.A Ch1/272nm

PeakTable

Detector A Ch1 272nm

| Peak# | Ret. Time | Area     | Height | Area %  | Height % |
|-------|-----------|----------|--------|---------|----------|
| 1     | 26.790    | 13130707 | 196787 | 90.541  | 96.361   |
| 2     | 37.135    | 475131   | 4029   | 3.276   | 1.973    |
| 3     | 52.981    | 426560   | 1817   | 2.941   | 0.890    |
| 4     | 61.164    | 470104   | 1584   | 3.242   | 0.776    |
| Total |           | 14502502 | 204217 | 100.000 | 100.000  |
